# Supplementary material for: Kinetic study of isoprene hydroxy hydroperoxide radicals reacting with sulphur dioxide and their global-scale impact on sulphate formation
Source: Royal Society of Chemistry journal article supplement (doi:10.1039/d4em00232f), 2024-01-01
Supplement: d4em00232f1.pdf [file d4em00232f1.pdf]

*Supplementary Information*

# **Kinetic study of isoprene hydroxy hydroperoxide radicals reacting with sulphur dioxide and their global-scale impact on sulphate formation**

Hiroo HATA<sup>a,\*</sup> and Kenichi TONOKURA<sup>b</sup>

*a. Research Institute of Science for Safety and Sustainability, National Institute of Advanced Industrial Science and Technology (AIST), 16-1 Onogawa, Tsukuba, Ibaraki 305-8569, Japan*

*b. Graduate School of Frontier Sciences, The University of Tokyo, Kashiwanoha, Kashiwa, Chiba 277-8563, Japan*

\*Corresponding author. E-mail: [hata-hiroo@aist.go.jp](mailto:hata-hiroo@aist.go.jp); Tel: +81-80-2212-2713

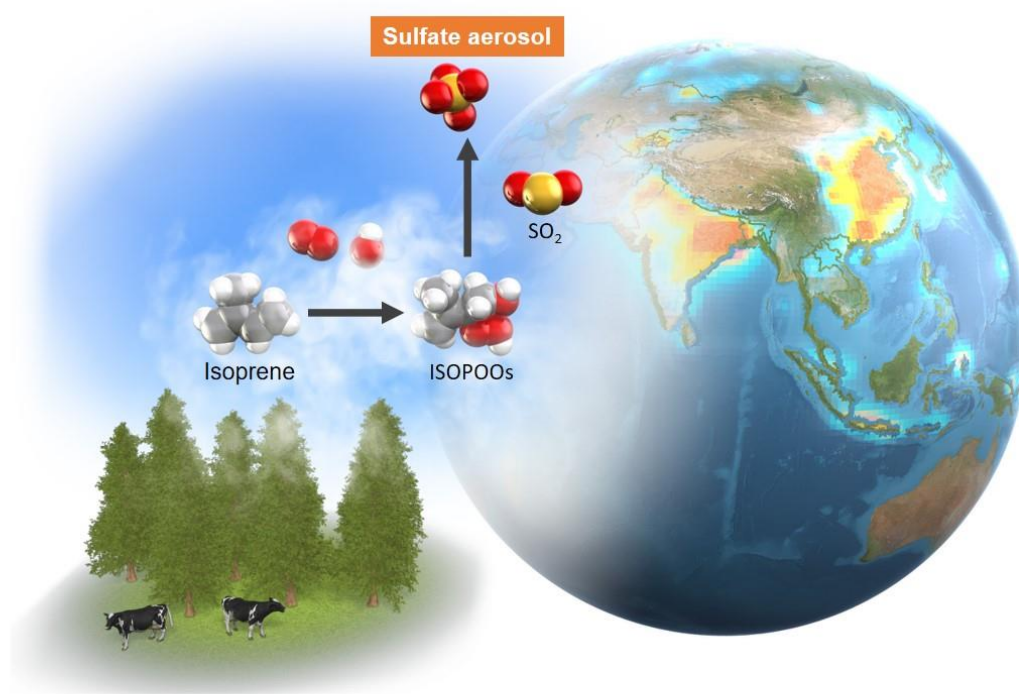

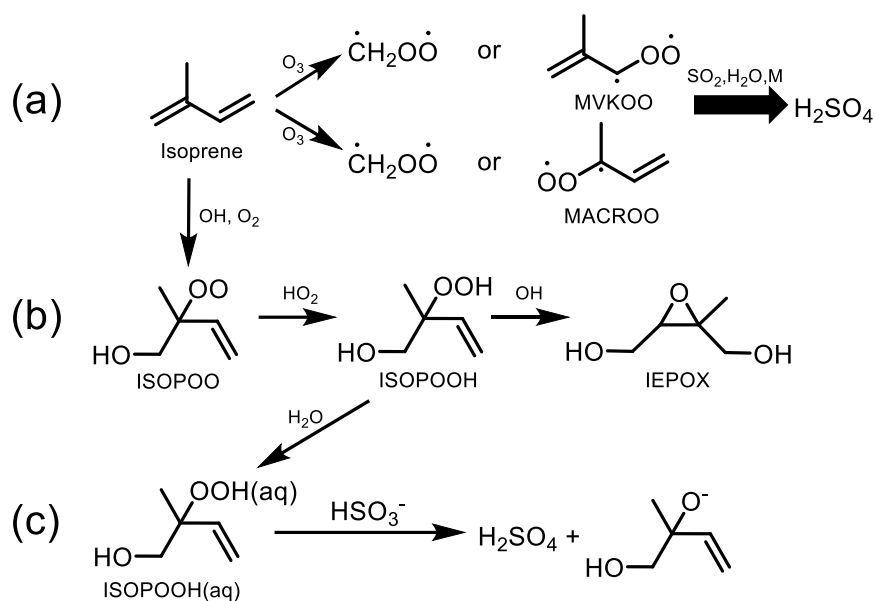

Figure S1: Chemical reactions of isoprene-derived particulate formations for the formation of (a) three Criegee intermediates (CIs), namely formaldehyde oxide ( $CH_2OO$ ), methyl-vinyl-ketone oxide (MVKOO), methacrolein oxide (MACROO) and  $SO_4^{2-}(p)$  in the gaseous phase, (b) ISOPOOs, ISOPOOHs and IEPOXs in the gaseous phase, and (c)  $SO_4^{2-}(p)$  by the oxidation of  $HSO_3^-$  from ISOPOOHs in the liquid phase. Figure S1 was obtained from Hata et al. (2023)<sup>9</sup>, which is freely licensed under CC BY 4.0 DEED.

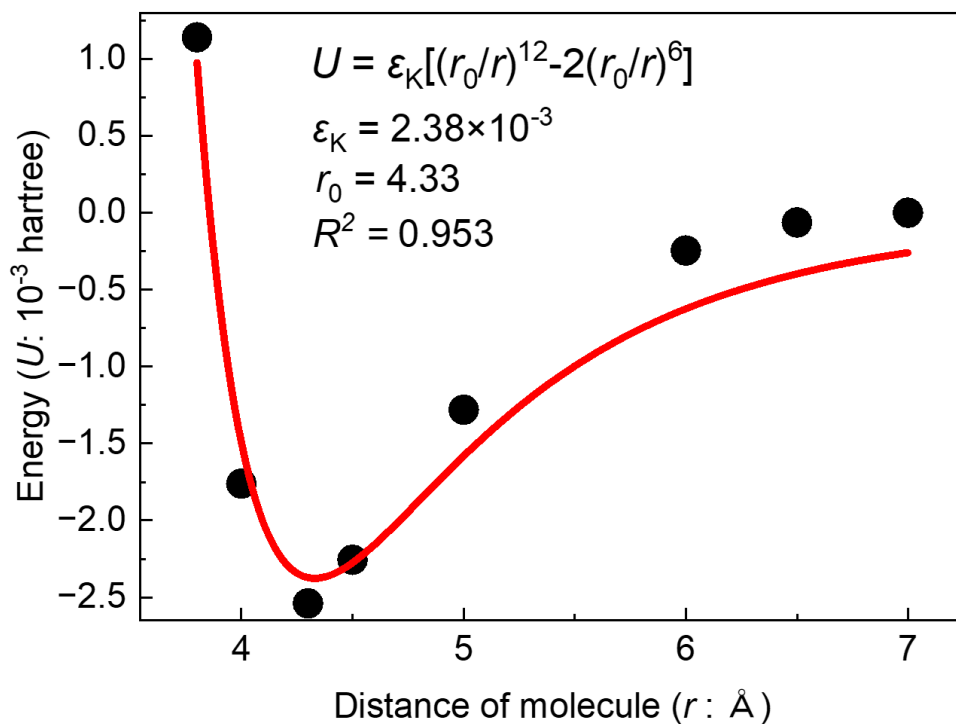

Figure S2: Lennard–Jones potential of 1,2–ISOPOOSO<sub>2</sub> calculated using G16, the theoretical level of M06-2X/aug-cc-pV(T+d)Z. Here,  $\epsilon_K$  is the well-depth of the potential (Hartree),  $r_0$  is the molecular distance (Å) when  $dU/dt = 0$  and  $R^2$  is the coefficient of determination. The collision diameter,  $\sigma$ , was determined by  $\sigma = 2^{-1/16}r_0$ .

(a) 1,2-ISOPOO

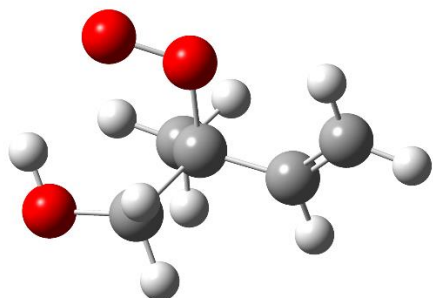

(b) 4,3-ISOPOO

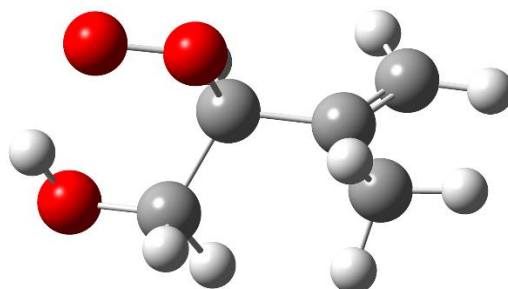

(c) Z-1,4-ISOPOO

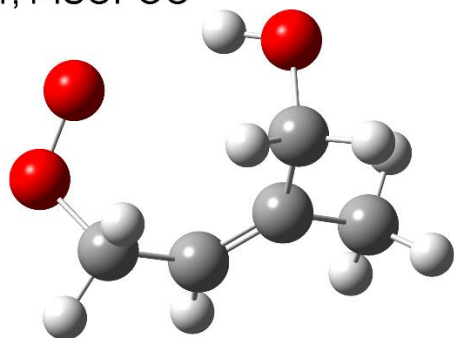

(d) Z-4,1-ISOPOO

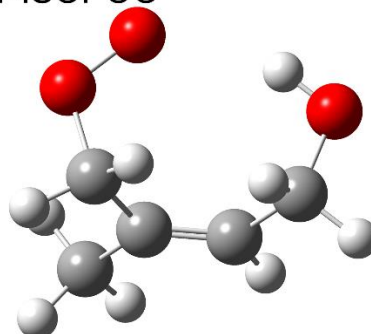

(e) E-1,4-ISOPOO

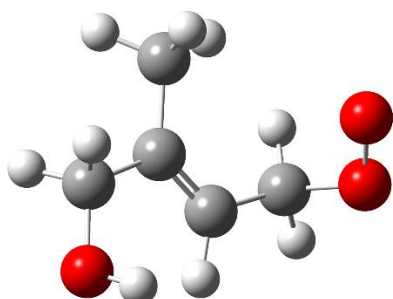

(f) E-4,1-ISOPOO

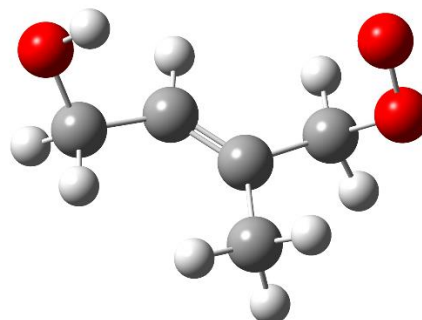

Figure S3: Optimized structures of the six ISOPOO isomers. The Cartesian coordinates of each structure are listed in Tables S1–S6.

Table S1: Optimised coordinates of 1,2-ISOPOO calculated by G16 at the M06-2X/aug-cc-pVTZ and M06-2X/aug-cc-pV(T+d)Z levels of theory.

| Atom | X         | Y         | Z         |
|------|-----------|-----------|-----------|
| C    | -0.177385 | -0.204699 | 0.231345  |
| C    | 0.70977   | -0.849466 | -0.843535 |
| C    | -1.595443 | -0.652673 | 0.032211  |
| C    | -2.567663 | 0.058122  | -0.514975 |
| O    | 2.085531  | -0.804621 | -0.576007 |
| O    | -0.191154 | 1.249124  | 0.034315  |
| O    | 0.996754  | 1.754125  | -0.07162  |
| H    | 2.333163  | 0.122045  | -0.494241 |
| H    | -2.413289 | 1.072582  | -0.854726 |
| H    | -3.557483 | -0.361444 | -0.627507 |
| H    | 0.459016  | -0.381712 | -1.80163  |
| H    | 0.438413  | -1.903509 | -0.905558 |
| H    | -1.783847 | -1.666775 | 0.368711  |
| C    | 0.313031  | -0.483105 | 1.641108  |
| H    | 0.348101  | -1.559875 | 1.803289  |
| H    | 1.315825  | -0.085839 | 1.774814  |
| H    | -0.362817 | -0.033573 | 2.36642   |

Table S2: Optimised coordinates of 4,3-ISOPOO calculated by G16 at the M06-2X/aug-cc-pVTZ and M06-2X/aug-cc-pV(T+d)Z levels of theory.

| Atom | X         | Y         | Z         |
|------|-----------|-----------|-----------|
| C    | -0.059157 | -0.030873 | -0.396237 |
| C    | -0.84549  | -1.058865 | 0.411173  |
| C    | 1.421519  | -0.073447 | -0.149096 |
| C    | 1.867788  | 0.078588  | 1.275622  |
| C    | 2.255937  | -0.262744 | -1.161613 |
| O    | -2.116257 | -1.328417 | -0.121666 |
| O    | -0.481667 | 1.322527  | -0.02481  |
| O    | -1.766722 | 1.477915  | -0.085036 |
| H    | -2.59104  | -0.492345 | -0.171597 |
| H    | -0.291269 | -0.145063 | -1.455401 |
| H    | 1.897782  | -0.364719 | -2.177616 |
| H    | 3.324526  | -0.325406 | -1.002667 |
| H    | 1.50433   | -0.748629 | 1.888748  |
| H    | 2.952958  | 0.100972  | 1.340915  |
| H    | 1.471329  | 0.998627  | 1.707129  |
| H    | -0.905856 | -0.719287 | 1.451189  |
| H    | -0.289173 | -1.996305 | 0.392298  |

Table S3: Optimised coordinates of Z-1,4-ISOPOO calculated by G16 at the M06-2X/aug-cc-pVTZ and M06-2X/aug-cc-pV(T+d)Z levels of theory.

| Atom | X         | Y         | Z         |
|------|-----------|-----------|-----------|
| C    | 0.999916  | -0.56053  | 0.119155  |
| C    | 1.123628  | 0.770557  | 0.820766  |
| C    | -0.131136 | -1.261591 | 0.051455  |
| C    | -1.432245 | -0.865062 | 0.658766  |
| O    | 1.108451  | 1.825752  | -0.121531 |
| H    | 0.231579  | 1.826062  | -0.52225  |
| H    | -1.335126 | -0.204393 | 1.515223  |
| H    | 2.088601  | 0.828161  | 1.325623  |
| H    | 0.346414  | 0.911669  | 1.573172  |
| H    | -0.144344 | -2.174667 | -0.533381 |
| C    | 2.24313   | -1.00095  | -0.59052  |
| H    | 2.592982  | -0.198603 | -1.241914 |
| H    | 3.039218  | -1.197873 | 0.130716  |
| H    | 2.078932  | -1.89705  | -1.184873 |
| O    | -2.27596  | -0.158483 | -0.307767 |
| O    | -1.792316 | 1.00004   | -0.614086 |
| H    | -2.039412 | -1.726329 | 0.927037  |

Table S4: Optimised coordinates of Z-4,1-ISOPOO calculated by G16 at the M06-2X/aug-cc-pVTZ and M06-2X/aug-cc-pV(T+d)Z levels of theory.

| Atom | X         | Y         | Z         |
|------|-----------|-----------|-----------|
| C    | 0.999916  | -0.56053  | 0.119155  |
| C    | 1.123628  | 0.770557  | 0.820766  |
| C    | -0.131136 | -1.261591 | 0.051455  |
| C    | -1.432245 | -0.865062 | 0.658766  |
| O    | 1.108451  | 1.825752  | -0.121531 |
| H    | 0.231579  | 1.826062  | -0.52225  |
| H    | -1.335126 | -0.204393 | 1.515223  |
| H    | 2.088601  | 0.828161  | 1.325623  |
| H    | 0.346414  | 0.911669  | 1.573172  |
| H    | -0.144344 | -2.174667 | -0.533381 |
| C    | 2.24313   | -1.00095  | -0.59052  |
| H    | 2.592982  | -0.198603 | -1.241914 |
| H    | 3.039218  | -1.197873 | 0.130716  |
| H    | 2.078932  | -1.89705  | -1.184873 |
| O    | -2.27596  | -0.158483 | -0.307767 |
| O    | -1.792316 | 1.00004   | -0.614086 |
| H    | -2.039412 | -1.726329 | 0.927037  |



Table S5: Optimised coordinates of *E*-1,4-ISOPOO calculated by G16 at the M06-2X/aug-cc-pVTZ and M06-2X/aug-cc-pV(T+d)Z levels of theory.

| Atom | X         | Y         | Z         |
|------|-----------|-----------|-----------|
| C    | 0.76018   | 0.413879  | 0.235058  |
| C    | 2.195876  | 0.194555  | -0.171306 |
| C    | -0.027288 | -0.613124 | 0.542749  |
| C    | -1.465408 | -0.509935 | 0.917132  |
| O    | 2.58483   | -1.147405 | -0.326967 |
| H    | 2.089679  | -1.529555 | -1.056426 |
| H    | -1.733332 | 0.44842   | 1.353896  |
| H    | 2.845191  | 0.61456   | 0.600511  |
| H    | 2.386696  | 0.770628  | -1.085182 |
| H    | 0.389229  | -1.611871 | 0.505957  |
| C    | 0.362392  | 1.858204  | 0.22286   |
| H    | -0.604923 | 2.039957  | 0.679605  |
| H    | 1.114966  | 2.462024  | 0.734159  |
| H    | 0.306667  | 2.213245  | -0.807954 |
| O    | -2.332226 | -0.690262 | -0.243998 |
| O    | -2.24998  | 0.318299  | -1.052402 |
| H    | -1.769686 | -1.313945 | 1.583411  |

Table S6: Optimised coordinates of *E*-4,1-ISOPOO calculated by G16 at the M06-2X/aug-cc-pVTZ and M06-2X/aug-cc-pV(T+d)Z levels of theory.

| Atom | X         | Y         | Z         |
|------|-----------|-----------|-----------|
| C    | 0.084581  | 0.163418  | 0.376671  |
| C    | 1.288533  | -0.67979  | 0.687322  |
| C    | -1.122352 | -0.391461 | 0.471631  |
| C    | -2.451382 | 0.255862  | 0.236035  |
| O    | 2.149006  | -0.781212 | -0.475108 |
| H    | -2.347492 | 1.289957  | -0.095348 |
| H    | 1.010152  | -1.704038 | 0.924324  |
| H    | 1.897475  | -0.250953 | 1.48302   |
| H    | -1.189309 | -1.443069 | 0.736157  |
| C    | 0.385894  | 1.58707   | 0.014193  |
| H    | 0.898084  | 2.083834  | 0.84057   |
| H    | 1.065477  | 1.624665  | -0.838027 |
| H    | -0.505866 | 2.156254  | -0.228405 |
| O    | -3.231022 | -0.49375  | -0.682724 |
| H    | -3.027058 | 0.264592  | 1.162475  |
| H    | -2.738213 | -0.578464 | -1.502979 |
| O    | 3.060154  | 0.143291  | -0.49178  |

(a) *E*-1,4-ISOPOO+SO<sub>2</sub> (complex)

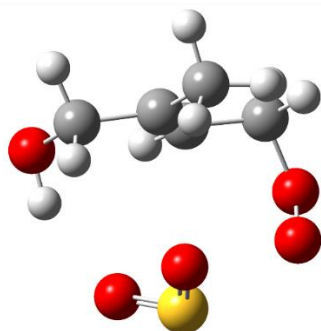

(b) *E*-1,4-ISOPO+OSO<sub>2</sub> (complex)

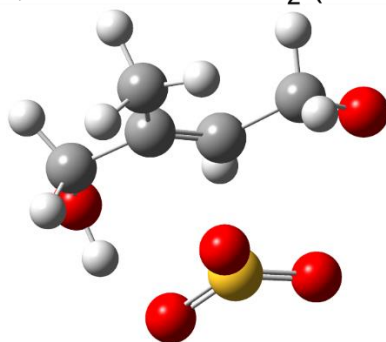

Figure S4: Optimised structures of *E*-1,4-ISOPOO+SO<sub>2</sub> and *E*-1,4-ISOPO+OSO<sub>2</sub> complexes

The Cartesian coordinates of the structures are listed in Tables S21 and S22.

Table S7: Optimised coordinates of the complex of *E*-1,4-ISOPOO+SO<sub>2</sub> calculated by G16 at the M06-2X/aug-cc-pVTZ and M06-2X/aug-cc-pV(T+d)Z levels of theory.

| M06-2X/aug-cc-pVTZ |           |           |           | M06-2X/aug-cc-pV(T+d)Z |           |           |           |
|--------------------|-----------|-----------|-----------|------------------------|-----------|-----------|-----------|
| Atom               | X         | Y         | Z         | Atom                   | X         | Y         | Z         |
| C                  | -0.469893 | 1.41967   | 0.337087  | C                      | 0.389272  | -1.440556 | 0.344754  |
| C                  | -1.915027 | 1.304439  | -0.084621 | C                      | 1.841256  | -1.402901 | -0.067642 |
| C                  | 0.504609  | 1.323287  | -0.563386 | C                      | -0.572802 | -1.304776 | -0.56395  |
| C                  | 1.960882  | 1.406373  | -0.287711 | C                      | -2.033293 | -1.306414 | -0.298068 |
| O                  | -2.126092 | 1.055824  | -1.448358 | O                      | 2.074172  | -1.181315 | -1.432616 |
| H                  | -1.87218  | 0.143055  | -1.623022 | H                      | 1.865946  | -0.259881 | -1.62132  |
| H                  | 2.204596  | 1.599102  | 0.753197  | H                      | -2.294754 | -1.492404 | 0.73969   |
| H                  | -2.422389 | 2.243388  | 0.152284  | H                      | 2.299154  | -2.36335  | 0.183272  |
| H                  | -2.379401 | 0.529676  | 0.537668  | H                      | 2.340388  | -0.6455   | 0.549261  |
| H                  | 0.230928  | 1.178076  | -1.601884 | H                      | -0.284599 | -1.184476 | -1.601645 |
| C                  | -0.303011 | 1.648744  | 1.80867   | C                      | 0.201066  | -1.64367  | 1.81754   |
| H                  | 0.727386  | 1.574759  | 2.143489  | H                      | -0.828232 | -1.524338 | 2.142239  |
| H                  | -0.681447 | 2.63717   | 2.078357  | H                      | 0.537721  | -2.642699 | 2.103047  |
| H                  | -0.889002 | 0.914234  | 2.362226  | H                      | 0.811324  | -0.926062 | 2.367116  |
| O                  | 2.634668  | 0.155662  | -0.644964 | O                      | -2.630675 | -0.015749 | -0.649449 |
| O                  | 2.211895  | -0.840357 | 0.059899  | O                      | -2.161278 | 0.945873  | 0.073692  |
| H                  | 2.463327  | 2.132658  | -0.924609 | H                      | -2.571997 | -1.997843 | -0.94392  |
| S                  | -0.265204 | -2.070074 | 0.162857  | S                      | 0.383014  | 2.054605  | 0.146424  |
| O                  | -0.880735 | -1.633695 | -1.066312 | O                      | 0.960843  | 1.569993  | -1.069787 |
| O                  | -0.815225 | -1.543186 | 1.381778  | O                      | 0.887418  | 1.525296  | 1.371119  |

Table S8: Optimized coordinates of the complex of *E*-1,4-ISOPO+OSO<sub>2</sub> calculated by G16 at the M06-2X/aug-cc-pVTZ and M06-2X/aug-cc-pV(T+d)Z levels of theory.

| M06-2X/aug-cc-pVTZ |           |           |           | M06-2X/aug-cc-pV(T+d)Z |           |           |           |
|--------------------|-----------|-----------|-----------|------------------------|-----------|-----------|-----------|
| Atom               | X         | Y         | Z         | Atom                   | X         | Y         | Z         |
| C                  | -0.928371 | 0.988686  | 0.313395  | C                      | -0.919498 | 0.989521  | 0.312177  |
| C                  | -2.2514   | 0.503711  | -0.214975 | C                      | -2.246269 | 0.513609  | -0.215118 |
| C                  | 0.16565   | 1.052709  | -0.470056 | C                      | 0.176074  | 1.041905  | -0.470326 |
| C                  | 1.494536  | 1.630156  | -0.051005 | C                      | 1.506588  | 1.617528  | -0.053285 |
| O                  | -2.268057 | 0.181079  | -1.57441  | O                      | -2.267008 | 0.190829  | -1.574344 |
| H                  | -1.87666  | -0.692676 | -1.679643 | H                      | -1.880262 | -0.684882 | -1.680431 |
| H                  | 1.887504  | 1.162534  | 0.864556  | H                      | 1.897313  | 1.153887  | 0.865124  |
| H                  | -2.978654 | 1.305496  | -0.056202 | H                      | -2.967072 | 1.321106  | -0.055953 |
| H                  | -2.573774 | -0.338966 | 0.408322  | H                      | -2.574392 | -0.326101 | 0.409141  |
| H                  | 0.072551  | 0.814387  | -1.524424 | H                      | 0.081729  | 0.802357  | -1.524282 |
| C                  | -0.944516 | 1.415928  | 1.745504  | C                      | -0.93426  | 1.424722  | 1.741941  |
| H                  | 0.050558  | 1.472201  | 2.177641  | H                      | 0.060279  | 1.471712  | 2.176344  |
| H                  | -1.409514 | 2.40284   | 1.815823  | H                      | -1.387473 | 2.4176    | 1.804861  |
| H                  | -1.539875 | 0.727338  | 2.344612  | H                      | -1.539491 | 0.74688   | 2.343331  |
| O                  | 2.450125  | 1.593658  | -1.023154 | O                      | 2.463125  | 1.571536  | -1.024163 |
| O                  | 1.761452  | -1.27301  | -0.453501 | O                      | 1.746886  | -1.279602 | -0.43593  |
| H                  | 1.383226  | 2.696265  | 0.216185  | H                      | 1.398536  | 2.685503  | 0.207341  |
| S                  | 0.486683  | -1.347914 | 0.191896  | S                      | 0.475972  | -1.346498 | 0.193894  |
| O                  | -0.617069 | -1.936018 | -0.516562 | O                      | -0.617257 | -1.921487 | -0.519537 |
| O                  | 0.421339  | -1.256952 | 1.620829  | O                      | 0.399189  | -1.257251 | 1.611461  |

(a) 1,2-ISOPOO+SO<sub>2</sub>

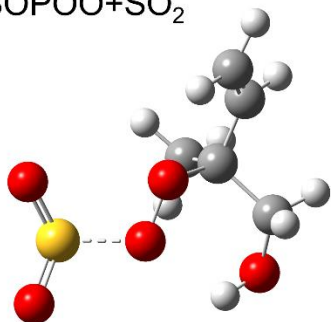

(b) 4,3-ISOPOO+SO<sub>2</sub>

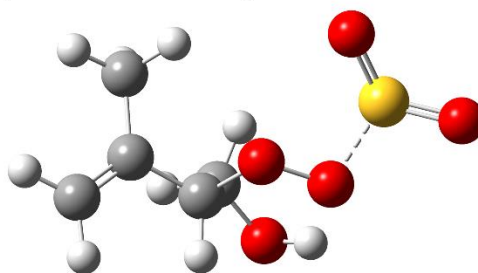

(c) Z-1,4-ISOPOO+SO<sub>2</sub>

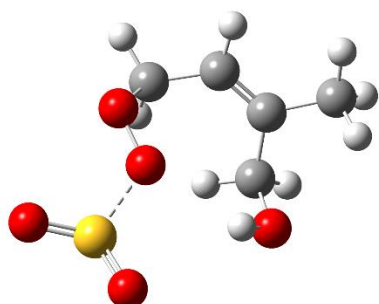

(d) Z-4,1-ISOPOO+SO<sub>2</sub>

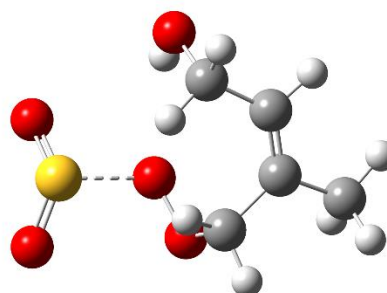

(e) E-1,4-ISOPOO+SO<sub>2</sub>

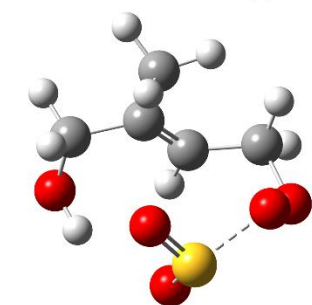

(f) E-4,1-ISOPOO+SO<sub>2</sub>

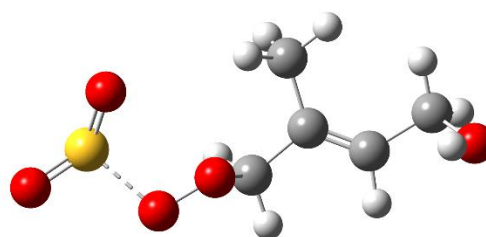

Figure S5: Transition-state optimised structures of the six isomers of ISOPOOs + SO<sub>2</sub> reactions. The Cartesian coordinates of each structure are listed in Tables S9–S14.

Table S9: Optimized coordinates of the transition state of 1,2-ISOPOO + SO<sub>2</sub> calculated by G16 at the M06-2X/aug-cc-pVTZ and M06-2X/aug-cc-pV(T+d)Z levels of theory.

| M06-2X/aug-cc-pVTZ |           |           |           | M06-2X/aug-cc-pV(T+d)Z |           |           |           |
|--------------------|-----------|-----------|-----------|------------------------|-----------|-----------|-----------|
| Atom               | X         | Y         | Z         | Atom                   | X         | Y         | Z         |
| C                  | 1.415296  | 0.035164  | 0.231105  | C                      | 1.417872  | 0.035576  | 0.232862  |
| C                  | 1.915953  | 1.347689  | -0.392392 | C                      | 1.908218  | 1.349696  | -0.39558  |
| C                  | 2.51641   | -0.984965 | 0.161568  | C                      | 2.524297  | -0.978469 | 0.160873  |
| C                  | 2.5555    | -2.042933 | -0.630951 | C                      | 2.570207  | -2.032477 | -0.636559 |
| O                  | 1.138712  | 2.479989  | -0.099257 | O                      | 1.128855  | 2.47902   | -0.097461 |
| O                  | 0.344777  | -0.524102 | -0.582562 | O                      | 0.346027  | -0.531393 | -0.574604 |
| O                  | -0.648653 | 0.359521  | -0.770271 | O                      | -0.645396 | 0.348613  | -0.772159 |
| H                  | 0.283979  | 2.387079  | -0.528381 | H                      | 0.270763  | 2.381127  | -0.518728 |
| H                  | 1.751583  | -2.280344 | -1.312982 | H                      | 1.768452  | -2.271047 | -1.320755 |
| H                  | 3.403718  | -2.712453 | -0.605937 | H                      | 3.421925  | -2.697609 | -0.61358  |
| H                  | 2.020029  | 1.184814  | -1.469601 | H                      | 2.005044  | 1.186245  | -1.473415 |
| H                  | 2.907872  | 1.545567  | 0.01387   | H                      | 2.90238   | 1.551624  | 0.003089  |
| H                  | 3.337399  | -0.780079 | 0.840198  | H                      | 3.343242  | -0.772254 | 0.841562  |
| C                  | 0.916581  | 0.216742  | 1.65485   | C                      | 0.922644  | 0.217355  | 1.657671  |
| H                  | 1.747559  | 0.535764  | 2.283235  | H                      | 1.751809  | 0.550991  | 2.280862  |
| H                  | 0.153837  | 0.990142  | 1.705365  | H                      | 0.149342  | 0.980219  | 1.706986  |
| H                  | 0.526415  | -0.726589 | 2.034755  | H                      | 0.54624   | -0.728967 | 2.04371   |
| S                  | -2.201412 | -0.125615 | 0.24205   | S                      | -2.211185 | -0.126999 | 0.239915  |
| O                  | -3.245872 | 0.553705  | -0.480533 | O                      | -3.237841 | 0.544984  | -0.491985 |
| O                  | -2.192493 | -1.564644 | 0.310323  | O                      | -2.196604 | -1.553527 | 0.323214  |

Table S10: Optimised coordinates of the transition state of 4,3-ISOPOO + SO<sub>2</sub> calculated by G16 at the M06-2X/aug-cc-pVTZ and M06-2X/aug-cc-pV(T+d)Z levels of theory.

| M06-2X/aug-cc-pVTZ |           |           |           | M06-2X/aug-cc-pV(T+d)Z |           |           |           |
|--------------------|-----------|-----------|-----------|------------------------|-----------|-----------|-----------|
| Atom               | X         | Y         | Z         | Atom                   | X         | Y         | Z         |
| C                  | -1.320783 | 0.525172  | -0.361992 | C                      | -1.324022 | 0.523625  | -0.362498 |
| C                  | -0.856764 | 1.233415  | 0.908177  | C                      | -0.8615   | 1.236383  | 0.905832  |
| C                  | -2.456714 | -0.431345 | -0.123761 | C                      | -2.458476 | -0.434017 | -0.122596 |
| C                  | -2.231049 | -1.484087 | 0.921851  | C                      | -2.23162  | -1.483886 | 0.925652  |
| C                  | -3.582946 | -0.300281 | -0.810043 | C                      | -3.584725 | -0.306346 | -0.80949  |
| O                  | -0.190221 | 2.44699   | 0.665026  | O                      | -0.197052 | 2.450073  | 0.65891   |
| O                  | -0.261027 | -0.312374 | -0.904696 | O                      | -0.261352 | -0.313406 | -0.901791 |
| O                  | 0.892455  | 0.368987  | -1.039808 | O                      | 0.889225  | 0.367136  | -1.037695 |
| H                  | 0.547524  | 2.287081  | 0.070681  | H                      | 0.550954  | 2.286031  | 0.07862   |
| H                  | -1.575631 | 1.267701  | -1.119449 | H                      | -1.578593 | 1.263355  | -1.122697 |
| H                  | -3.701855 | 0.469563  | -1.561081 | H                      | -3.704611 | 0.461538  | -1.562379 |
| H                  | -4.422741 | -0.960422 | -0.637204 | H                      | -4.423565 | -0.967349 | -0.635305 |
| H                  | -2.116105 | -1.03374  | 1.910288  | H                      | -2.117043 | -1.030911 | 1.912917  |
| H                  | -3.068898 | -2.175973 | 0.959451  | H                      | -3.068636 | -2.176679 | 0.965043  |
| H                  | -1.317796 | -2.044006 | 0.715248  | H                      | -1.317822 | -2.043445 | 0.720366  |
| H                  | -0.249108 | 0.541735  | 1.504347  | H                      | -0.25264  | 0.547685  | 1.504     |
| H                  | -1.741136 | 1.480254  | 1.49512   | H                      | -1.746802 | 1.483511  | 1.491267  |
| S                  | 2.183523  | -0.264344 | 0.208652  | S                      | 2.19206   | -0.26809  | 0.210087  |
| O                  | 3.427528  | 0.012526  | -0.460552 | O                      | 3.419918  | 0.020176  | -0.459352 |
| O                  | 1.80613   | -1.62362  | 0.504878  | O                      | 1.817743  | -1.617585 | 0.498101  |



Table S11: Optimised coordinates of the transition state of Z-1,4-ISOPOO + SO<sub>2</sub> calculated by G16 at the M06-2X/aug-cc-pVTZ and M06-2X/aug-cc-pV(T+d)Z levels of theory.

| M06-2X/aug-cc-pVTZ |           |           |           | M06-2X/aug-cc-pV(T+d)Z |           |           |           |
|--------------------|-----------|-----------|-----------|------------------------|-----------|-----------|-----------|
| Atom               | X         | Y         | Z         | Atom                   | X         | Y         | Z         |
| C                  | -2.327604 | 0.095832  | 0.133796  | C                      | -2.333628 | 0.093357  | 0.135798  |
| C                  | -1.616185 | -1.003295 | 0.88497   | C                      | -1.619382 | -1.005033 | 0.885227  |
| C                  | -1.851242 | 1.331474  | -0.012514 | C                      | -1.85655  | 1.328275  | -0.014245 |
| C                  | -0.556698 | 1.839912  | 0.527527  | C                      | -0.560695 | 1.836483  | 0.522724  |
| O                  | -1.17957  | -2.024039 | 0.008177  | O                      | -1.177972 | -2.020864 | 0.00492   |
| H                  | -0.496976 | -1.666458 | -0.569481 | H                      | -0.503793 | -1.653857 | -0.576646 |
| H                  | -0.227005 | 1.325016  | 1.43084   | H                      | -0.229841 | 1.323048  | 1.426299  |
| H                  | -2.318663 | -1.482715 | 1.568501  | H                      | -2.320584 | -1.489453 | 1.566459  |
| H                  | -0.78608  | -0.622647 | 1.481791  | H                      | -0.790921 | -0.623091 | 1.483428  |
| H                  | -2.41563  | 2.038934  | -0.60972  | H                      | -2.42173  | 2.035165  | -0.611365 |
| C                  | -3.617526 | -0.329129 | -0.498259 | C                      | -3.625545 | -0.331873 | -0.491953 |
| H                  | -3.45178  | -1.21243  | -1.11568  | H                      | -3.462385 | -1.217495 | -1.106769 |
| H                  | -4.337797 | -0.610435 | 0.273079  | H                      | -4.34442  | -0.609512 | 0.282006  |
| H                  | -4.049118 | 0.459923  | -1.109709 | H                      | -4.057525 | 0.455652  | -1.10511  |
| O                  | 0.527059  | 1.727993  | -0.429823 | O                      | 0.522397  | 1.720302  | -0.435504 |
| O                  | 0.70216   | 0.4445    | -0.769127 | O                      | 0.699399  | 0.438287  | -0.769913 |
| H                  | -0.586784 | 2.909627  | 0.722078  | H                      | -0.589218 | 2.906697  | 0.714481  |
| S                  | 2.13741   | -0.3601   | 0.218113  | S                      | 2.149037  | -0.362769 | 0.218137  |
| O                  | 2.258492  | -1.602024 | -0.503101 | O                      | 2.283535  | -1.58556  | -0.5098   |
| O                  | 3.227709  | 0.580323  | 0.222045  | O                      | 3.21147   | 0.591572  | 0.236763  |

Table S12: Optimised coordinates of the transition state of Z-4,1-ISOPOO + SO<sub>2</sub> calculated by G16 at the M06-2X/aug-cc-pVTZ and M06-2X/aug-cc-pV(T+d)Z levels of theory.

| M06-2X/aug-cc-pVTZ |           |           |           | M06-2X/aug-cc-pV(T+d)Z |           |           |           |
|--------------------|-----------|-----------|-----------|------------------------|-----------|-----------|-----------|
| Atom               | X         | Y         | Z         | Atom                   | X         | Y         | Z         |
| C                  | 2.185404  | -0.431853 | 0.116257  | C                      | 2.187656  | -0.434885 | 0.117318  |
| C                  | 1.079665  | -1.201384 | 0.778079  | C                      | 1.081806  | -1.202371 | 0.781215  |
| C                  | 2.242833  | 0.897447  | 0.130908  | C                      | 2.245217  | 0.894398  | 0.128403  |
| C                  | 1.255519  | 1.846141  | 0.742827  | C                      | 1.259472  | 1.845934  | 0.738628  |
| O                  | 0.054297  | -1.583758 | -0.167714 | O                      | 0.054678  | -1.583507 | -0.164027 |
| H                  | 1.780982  | 2.611421  | 1.313557  | H                      | 1.786467  | 2.608522  | 1.311606  |
| H                  | 0.583758  | -0.658147 | 1.581936  | H                      | 0.586412  | -0.657409 | 1.584106  |
| H                  | 1.425929  | -2.162439 | 1.155727  | H                      | 1.427039  | -2.163544 | 1.159374  |
| H                  | 3.049081  | 1.377648  | -0.415638 | H                      | 3.051347  | 1.372858  | -0.419879 |
| C                  | 3.177347  | -1.280046 | -0.624093 | C                      | 3.179258  | -1.285249 | -0.62109  |
| H                  | 3.709317  | -1.943375 | 0.0611    | H                      | 3.711391  | -1.946864 | 0.065637  |
| H                  | 2.664802  | -1.913858 | -1.351085 | H                      | 2.66655   | -1.920882 | -1.346398 |
| H                  | 3.906228  | -0.669141 | -1.151238 | H                      | 3.908083  | -0.675795 | -1.149992 |
| O                  | 0.534298  | 2.543333  | -0.256882 | O                      | 0.544494  | 2.547018  | -0.262611 |
| H                  | 0.572859  | 1.340979  | 1.429465  | H                      | 0.572658  | 1.342657  | 1.422408  |
| H                  | 0.107423  | 1.899404  | -0.831309 | H                      | 0.101425  | 1.905527  | -0.827449 |
| O                  | -0.491975 | -0.490092 | -0.716151 | O                      | -0.491568 | -0.49114  | -0.709416 |
| S                  | -2.134577 | -0.00474  | 0.180256  | S                      | -2.147085 | -0.00784  | 0.182117  |
| O                  | -2.820737 | -1.235957 | 0.475024  | O                      | -2.833642 | -1.23151  | 0.449088  |
| O                  | -2.687352 | 0.917914  | -0.776836 | O                      | -2.671269 | 0.928314  | -0.760551 |

Table S13: Optimised coordinates of the transition state of *E*-1,4-ISOPOO + SO<sub>2</sub> calculated by G16 at the M06-2X/aug-cc-pVTZ and M06-2X/aug-cc-pV(T+d)Z levels of theory.

| M06-2X/aug-cc-pVTZ |           |           |           | M06-2X/aug-cc-pV(T+d)Z |           |           |           |
|--------------------|-----------|-----------|-----------|------------------------|-----------|-----------|-----------|
| Atom               | X         | Y         | Z         | Atom                   | X         | Y         | Z         |
| C                  | -1.421445 | 0.689053  | 0.226756  | C                      | -1.422101 | 0.683566  | 0.23581   |
| C                  | -2.420302 | -0.42574  | 0.034843  | C                      | -2.416155 | -0.435357 | 0.043564  |
| C                  | -0.646209 | 1.073184  | -0.786282 | C                      | -0.656989 | 1.079781  | -0.780007 |
| C                  | 0.480957  | 2.03538   | -0.695368 | C                      | 0.46646   | 2.045954  | -0.688987 |
| O                  | -2.326616 | -1.102677 | -1.191046 | O                      | -2.333708 | -1.098312 | -1.190769 |
| H                  | -1.445885 | -1.48938  | -1.258679 | H                      | -1.452739 | -1.481577 | -1.272071 |
| H                  | 0.442698  | 2.678625  | 0.180202  | H                      | 0.428239  | 2.685621  | 0.1892    |
| H                  | -3.431795 | -0.01629  | 0.093219  | H                      | -3.429455 | -0.033392 | 0.119348  |
| H                  | -2.307783 | -1.116138 | 0.879877  | H                      | -2.288588 | -1.134306 | 0.879538  |
| H                  | -0.781443 | 0.593301  | -1.746144 | H                      | -0.796831 | 0.606714  | -1.742591 |
| C                  | -1.399479 | 1.233803  | 1.622692  | C                      | -1.389957 | 1.215762  | 1.636361  |
| H                  | -0.77873  | 2.117725  | 1.733189  | H                      | -0.776675 | 2.104754  | 1.747935  |
| H                  | -2.414409 | 1.487613  | 1.935654  | H                      | -2.40363  | 1.456411  | 1.963375  |
| H                  | -1.03099  | 0.469686  | 2.308648  | H                      | -1.00584  | 0.44917   | 2.311005  |
| O                  | 1.770683  | 1.354024  | -0.659773 | O                      | 1.75978   | 1.369682  | -0.658078 |
| O                  | 1.877111  | 0.616058  | 0.46554   | O                      | 1.870751  | 0.623836  | 0.458577  |
| H                  | 0.581236  | 2.644415  | -1.591925 | H                      | 0.562106  | 2.658689  | -1.583406 |
| S                  | 1.381249  | -1.198724 | 0.2433    | S                      | 1.384008  | -1.201167 | 0.228258  |
| O                  | 0.85037   | -1.378496 | -1.08997  | O                      | 0.843309  | -1.37199  | -1.089455 |
| O                  | 0.5167    | -1.466917 | 1.369913  | O                      | 0.551336  | -1.477171 | 1.361611  |

Table S14: Optimised coordinates of the transition state of *E*-4,1-ISOPOO + SO<sub>2</sub> calculated by G16 at the M06-2X/aug-cc-pVTZ and M06-2X/aug-cc-pV(T+d)Z levels of theory.

| M06-2X/aug-cc-pVTZ |           |           |           | M06-2X/aug-cc-pV(T+d)Z |           |           |           |
|--------------------|-----------|-----------|-----------|------------------------|-----------|-----------|-----------|
| Atom               | X         | Y         | Z         | Atom                   | X         | Y         | Z         |
| C                  | 1.568     | 0.160879  | -0.449663 | C                      | 1.571007  | 0.16015   | -0.448675 |
| C                  | 0.364371  | -0.68111  | -0.745482 | C                      | 0.3677    | -0.682794 | -0.742586 |
| C                  | 2.764554  | -0.420443 | -0.412446 | C                      | 2.767937  | -0.420398 | -0.411525 |
| C                  | 4.087277  | 0.23248   | -0.158504 | C                      | 4.09062   | 0.233648  | -0.160301 |
| O                  | -0.476286 | -0.635177 | 0.425085  | O                      | -0.475302 | -0.632894 | 0.426638  |
| H                  | 3.976785  | 1.290324  | 0.085089  | H                      | 3.979855  | 1.291694  | 0.082297  |
| H                  | 0.611193  | -1.720205 | -0.958165 | H                      | 0.614473  | -1.722836 | -0.950528 |
| H                  | -0.224577 | -0.266057 | -1.57028  | H                      | -0.221091 | -0.271349 | -1.569143 |
| H                  | 2.825748  | -1.493878 | -0.567224 | H                      | 2.829582  | -1.494062 | -0.564543 |
| C                  | 1.269083  | 1.61941   | -0.255912 | C                      | 1.271543  | 1.618894  | -0.257353 |
| H                  | 0.981475  | 2.071663  | -1.208019 | H                      | 0.981532  | 2.068948  | -1.209758 |
| H                  | 0.424495  | 1.743148  | 0.422843  | H                      | 0.428382  | 1.743543  | 0.423037  |
| H                  | 2.115362  | 2.17429   | 0.137109  | H                      | 2.118229  | 2.175183  | 0.13277   |
| O                  | 4.810774  | -0.449826 | 0.851987  | O                      | 4.816131  | -0.447071 | 0.849809  |
| H                  | 4.707182  | 0.166201  | -1.053641 | H                      | 4.709182  | 0.166775  | -1.056326 |
| H                  | 4.287771  | -0.449145 | 1.657804  | H                      | 4.294506  | -0.445663 | 1.656512  |
| O                  | -1.66063  | -1.205844 | 0.167212  | O                      | -1.65704  | -1.203881 | 0.170376  |
| S                  | -2.969502 | 0.171277  | -0.162305 | S                      | -2.977825 | 0.175802  | -0.159848 |
| O                  | -4.207214 | -0.483886 | 0.170989  | O                      | -4.200491 | -0.48948  | 0.158512  |
| O                  | -2.530783 | 1.309224  | 0.607652  | O                      | -2.546084 | 1.300568  | 0.611652  |

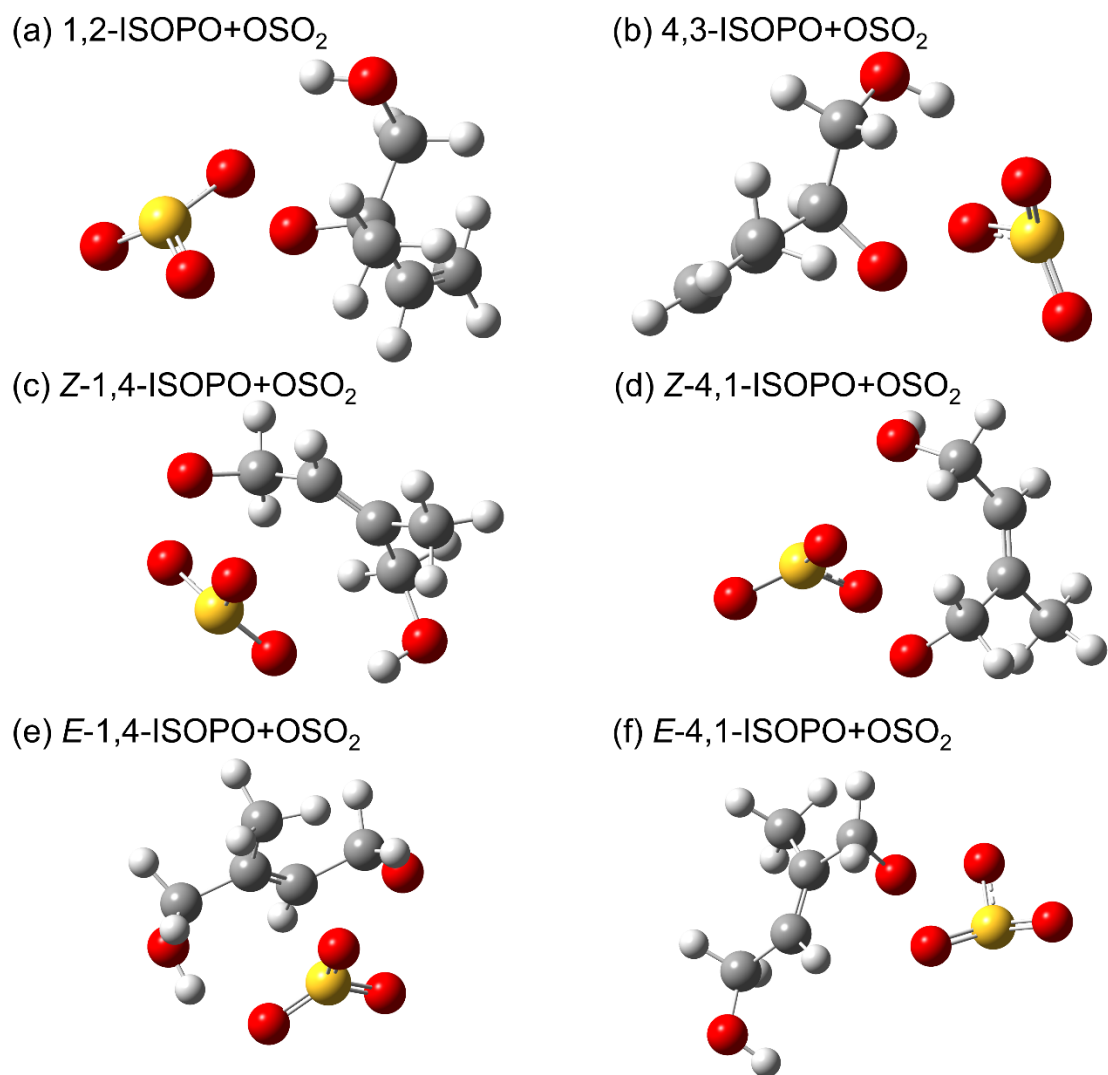

Figure S6: Transition-state optimized structures of the six isomers in the unimolecular reactions of ISOPOOSO<sub>2</sub>s. The Cartesian coordinates of each structure are listed in Tables S15–S20.

Table S15: Optimised coordinates of the transition state of 1,2-ISOPO+OSO<sub>2</sub> calculated by G16 at the M06-2X/aug-cc-pVTZ and M06-2X/aug-cc-pV(T+d)Z levels of theory.

| M06-2X/aug-cc-pVTZ |           |           |           | M06-2X/aug-cc-pV(T+d)Z |           |           |           |
|--------------------|-----------|-----------|-----------|------------------------|-----------|-----------|-----------|
| Atom               | X         | Y         | Z         | Atom                   | X         | Y         | Z         |
| C                  | 1.318035  | -0.097968 | 0.236298  | C                      | 1.311781  | -0.099237 | 0.234398  |
| C                  | 2.02395   | 1.110266  | -0.379111 | C                      | 2.017579  | 1.110886  | -0.377056 |
| C                  | 2.152737  | -1.369275 | 0.158078  | C                      | 2.142808  | -1.371185 | 0.145551  |
| C                  | 3.284218  | -1.505937 | -0.516201 | C                      | 3.27906   | -1.502928 | -0.52146  |
| O                  | 1.311416  | 2.313532  | -0.215293 | O                      | 1.309435  | 2.315406  | -0.203561 |
| O                  | 0.258258  | -0.542676 | -0.588844 | O                      | 0.244251  | -0.534478 | -0.590106 |
| O                  | -1.003586 | 0.628646  | -0.552355 | O                      | -1.000675 | 0.629064  | -0.535534 |
| H                  | 0.474509  | 2.247826  | -0.682475 | H                      | 0.471827  | 2.256365  | -0.670266 |
| H                  | 3.71984   | -0.7066   | -1.099528 | H                      | 3.721931  | -0.697588 | -1.090949 |
| H                  | 3.825886  | -2.441595 | -0.488815 | H                      | 3.81735   | -2.440709 | -0.502315 |
| H                  | 2.209878  | 0.903797  | -1.436726 | H                      | 2.199315  | 0.909713  | -1.436447 |
| H                  | 2.980691  | 1.251129  | 0.123739  | H                      | 2.976564  | 1.24631   | 0.122987  |
| H                  | 1.737756  | -2.20057  | 0.71493   | H                      | 1.721912  | -2.208252 | 0.689302  |
| C                  | 0.874455  | 0.147122  | 1.669496  | C                      | 0.874488  | 0.138902  | 1.670571  |
| H                  | 1.751163  | 0.320321  | 2.292762  | H                      | 1.754482  | 0.306248  | 2.290754  |
| H                  | 0.233816  | 1.023745  | 1.722601  | H                      | 0.236637  | 1.017027  | 1.7317    |
| H                  | 0.329625  | -0.717165 | 2.045024  | H                      | 0.329306  | -0.726144 | 2.043763  |
| S                  | -2.315044 | 0.023237  | -0.084674 | S                      | -2.307764 | 0.021899  | -0.081683 |
| O                  | -2.987821 | -0.792427 | -1.065005 | O                      | -2.973387 | -0.769537 | -1.06989  |
| O                  | -2.346122 | -0.326815 | 1.315487  | O                      | -2.337048 | -0.349452 | 1.301139  |

Table S16: Optimised coordinates of the transition state of 4,3-ISOPO+OSO<sub>2</sub> calculated by G16 at the M06-2X/aug-cc-pVTZ and M06-2X/aug-cc-pV(T+d)Z levels of theory.

| M06-2X/aug-cc-pVTZ |           |           |           | M06-2X/aug-cc-pV(T+d)Z |           |           |           |
|--------------------|-----------|-----------|-----------|------------------------|-----------|-----------|-----------|
| Atom               | X         | Y         | Z         | Atom                   | X         | Y         | Z         |
| C                  | -1.308086 | 0.351989  | -0.520643 | C                      | -1.298154 | 0.347308  | -0.518779 |
| C                  | -0.97119  | 1.500286  | 0.430262  | C                      | -0.963971 | 1.501357  | 0.425628  |
| C                  | -2.401098 | -0.56193  | 0.024354  | C                      | -2.400387 | -0.555632 | 0.023475  |
| C                  | -2.326387 | -0.921982 | 1.477436  | C                      | -2.334988 | -0.912428 | 1.478009  |
| C                  | -3.334459 | -1.008019 | -0.807307 | C                      | -3.33567  | -0.994684 | -0.809579 |
| O                  | -0.315134 | 2.560061  | -0.220006 | O                      | -0.302275 | 2.556524  | -0.226689 |
| O                  | -0.294713 | -0.603409 | -0.66803  | O                      | -0.284513 | -0.613471 | -0.651887 |
| O                  | 1.196559  | 0.208707  | -1.006851 | O                      | 1.18931   | 0.186334  | -1.003845 |
| H                  | 0.550757  | 2.259062  | -0.50576  | H                      | 0.567839  | 2.255825  | -0.499347 |
| H                  | -1.593506 | 0.760736  | -1.492742 | H                      | -1.572481 | 0.749052  | -1.496843 |
| H                  | -3.328991 | -0.743765 | -1.856226 | H                      | -3.32528  | -0.732637 | -1.859024 |
| H                  | -4.136281 | -1.644458 | -0.455289 | H                      | -4.144004 | -1.623322 | -0.458473 |
| H                  | -2.471524 | -0.04445  | 2.109515  | H                      | -2.473147 | -0.031571 | 2.107068  |
| H                  | -3.090191 | -1.654325 | 1.728591  | H                      | -3.107667 | -1.635661 | 1.728361  |
| H                  | -1.348795 | -1.339706 | 1.71973   | H                      | -1.362965 | -1.339941 | 1.725522  |
| H                  | -0.390234 | 1.113885  | 1.272973  | H                      | -0.389131 | 1.1197    | 1.274685  |
| H                  | -1.906567 | 1.911082  | 0.810286  | H                      | -1.900837 | 1.916228  | 0.797535  |
| S                  | 2.263837  | -0.23569  | -0.023009 | S                      | 2.258062  | -0.239989 | -0.025144 |
| O                  | 2.785382  | -1.560547 | -0.246491 | O                      | 2.768795  | -1.559791 | -0.227934 |
| O                  | 2.070564  | 0.269051  | 1.317935  | O                      | 2.075895  | 0.286232  | 1.296641  |

Table S17: Optimised coordinates of the transition state of Z-1,4-ISOPO+OSO<sub>2</sub> calculated by G16 at the M06-2X/aug-cc-pVTZ and M06-2X/aug-cc-pV(T+d)Z levels of theory.

| M06-2X/aug-cc-pVTZ |           |           |           | M06-2X/aug-cc-pV(T+d)Z |           |           |           |
|--------------------|-----------|-----------|-----------|------------------------|-----------|-----------|-----------|
| Atom               | X         | Y         | Z         | Atom                   | X         | Y         | Z         |
| C                  | 1.513392  | 0.607864  | 0.443169  | C                      | 1.519173  | 0.604377  | 0.441463  |
| C                  | 2.138237  | 0.348929  | -0.90631  | C                      | 2.137151  | 0.337157  | -0.909714 |
| C                  | 0.416053  | 1.341621  | 0.633625  | C                      | 0.425542  | 1.343155  | 0.633929  |
| C                  | -0.452877 | 1.971413  | -0.404818 | C                      | -0.443376 | 1.97442   | -0.40293  |
| O                  | 2.577631  | -0.983063 | -1.057008 | O                      | 2.574238  | -0.996202 | -1.05493  |
| H                  | 1.799292  | -1.549499 | -1.056759 | H                      | 1.795464  | -1.561915 | -1.046954 |
| H                  | -0.190006 | 1.725674  | -1.434212 | H                      | -0.173149 | 1.741105  | -1.433029 |
| H                  | 3.034396  | 0.968559  | -0.990195 | H                      | 3.033569  | 0.955188  | -1.001971 |
| H                  | 1.469056  | 0.629749  | -1.721237 | H                      | 1.464013  | 0.613743  | -1.722852 |
| H                  | 0.066555  | 1.504766  | 1.648561  | H                      | 0.080233  | 1.509357  | 1.649762  |
| C                  | 2.240782  | -0.00832  | 1.599921  | C                      | 2.248665  | -0.010902 | 1.597306  |
| H                  | 2.193493  | -1.095375 | 1.534433  | H                      | 2.194976  | -1.097964 | 1.536846  |
| H                  | 3.299121  | 0.257645  | 1.569947  | H                      | 3.308348  | 0.248789  | 1.560882  |
| H                  | 1.814961  | 0.307446  | 2.549212  | H                      | 1.829467  | 0.311658  | 2.547253  |
| O                  | -1.815567 | 1.733683  | -0.169687 | O                      | -1.806618 | 1.719065  | -0.178231 |
| H                  | -0.435276 | 3.069526  | -0.318279 | H                      | -0.437863 | 3.071188  | -0.305158 |
| S                  | -1.43634  | -1.062841 | -0.024863 | S                      | -1.443034 | -1.054889 | -0.022966 |
| O                  | -2.183521 | 0.143014  | -0.58774  | O                      | -2.150136 | 0.14597   | -0.625377 |
| O                  | -0.292304 | -1.507639 | -0.792798 | O                      | -0.291551 | -1.526022 | -0.740692 |
| O                  | -1.4367   | -1.183755 | 1.410084  | O                      | -1.492114 | -1.143085 | 1.402026  |



Table S18: Optimised coordinates of the transition state of Z-4,1-ISOPO+OSO<sub>2</sub> calculated by G16 at the M06-2X/aug-cc-pVTZ and M06-2X/aug-cc-pV(T+d)Z levels of theory.

| M06-2X/aug-cc-pVTZ |           |           |           | M06-2X/aug-cc-pV(T+d)Z |           |           |           |
|--------------------|-----------|-----------|-----------|------------------------|-----------|-----------|-----------|
| Atom               | X         | Y         | Z         | Atom                   | X         | Y         | Z         |
| C                  | 2.082052  | -0.316787 | 0.104528  | C                      | 2.07637   | -0.325034 | 0.104516  |
| C                  | 1.081128  | -1.034123 | 0.971013  | C                      | 1.070211  | -1.033486 | 0.971772  |
| C                  | 2.040003  | 0.997306  | -0.099904 | C                      | 2.04545   | 0.989455  | -0.099231 |
| C                  | 1.032417  | 1.973978  | 0.435172  | C                      | 1.045723  | 1.974031  | 0.43612   |
| O                  | 0.158794  | -1.78481  | 0.218911  | O                      | 0.139236  | -1.775847 | 0.219486  |
| H                  | 1.540252  | 2.890575  | 0.747456  | H                      | 1.560607  | 2.88731   | 0.746607  |
| H                  | 0.560372  | -0.384234 | 1.671664  | H                      | 0.555779  | -0.379207 | 1.67267   |
| H                  | 1.579144  | -1.824267 | 1.551689  | H                      | 1.560809  | -1.829187 | 1.550509  |
| H                  | 2.782535  | 1.423015  | -0.771377 | H                      | 2.790895  | 1.409182  | -0.771235 |
| C                  | 3.080159  | -1.208874 | -0.569899 | C                      | 3.066024  | -1.225464 | -0.571362 |
| H                  | 3.710697  | -1.710611 | 0.167452  | H                      | 3.692418  | -1.733651 | 0.165084  |
| H                  | 2.561821  | -1.987469 | -1.13265  | H                      | 2.540453  | -1.998772 | -1.134693 |
| H                  | 3.71919   | -0.652204 | -1.251591 | H                      | 3.709662  | -0.673849 | -1.252828 |
| O                  | 0.026473  | 2.288343  | -0.528479 | O                      | 0.041182  | 2.293581  | -0.526517 |
| H                  | 0.49206   | 1.586908  | 1.293766  | H                      | 0.503907  | 1.591816  | 1.296064  |
| H                  | 0.449032  | 2.484832  | -1.368779 | H                      | 0.463661  | 2.481032  | -1.368924 |
| S                  | -1.909905 | -0.067942 | -0.157694 | S                      | -1.907605 | -0.063743 | -0.157559 |
| O                  | -1.768893 | 0.441502  | 1.185189  | O                      | -1.764395 | 0.438431  | 1.175294  |
| O                  | -3.1315   | -0.720212 | -0.560215 | O                      | -3.119596 | -0.707749 | -0.55997  |
| O                  | -0.62627  | -0.625882 | -0.744153 | O                      | -0.631325 | -0.62489  | -0.737442 |

Table S19: Optimised coordinates of the transition state of  $E-1,4\text{-ISOP}O+\text{OSO}_2$  calculated by G16 at the M06-2X/aug-cc-pVTZ and M06-2X/aug-cc-pV(T+d)Z levels of theory.

| M06-2X/aug-cc-pVTZ |           |           |           | M06-2X/aug-cc-pV(T+d)Z |           |           |           |
|--------------------|-----------|-----------|-----------|------------------------|-----------|-----------|-----------|
| Atom               | X         | Y         | Z         | Atom                   | X         | Y         | Z         |
| C                  | -1.520616 | 0.61734   | 0.186089  | C                      | -1.524056 | 0.615799  | 0.182549  |
| C                  | -2.468465 | -0.515162 | -0.125678 | C                      | -2.467873 | -0.521836 | -0.122454 |
| C                  | -0.623863 | 1.006169  | -0.716973 | C                      | -0.629177 | 1.002606  | -0.723285 |
| C                  | 0.487856  | 1.978557  | -0.518834 | C                      | 0.480932  | 1.977213  | -0.531069 |
| O                  | -2.241388 | -1.165763 | -1.347469 | O                      | -2.236074 | -1.18107  | -1.338911 |
| H                  | -1.378212 | -1.593464 | -1.310562 | H                      | -1.369398 | -1.601366 | -1.300181 |
| H                  | 0.594696  | 2.343645  | 0.503281  | H                      | 0.578328  | 2.36056   | 0.485027  |
| H                  | -3.491098 | -0.13118  | -0.156789 | H                      | -3.491554 | -0.141253 | -0.159238 |
| H                  | -2.422763 | -1.220363 | 0.714117  | H                      | -2.422091 | -1.220435 | 0.722771  |
| H                  | -0.634162 | 0.534714  | -1.693282 | H                      | -0.638634 | 0.525144  | -1.696618 |
| C                  | -1.700554 | 1.190427  | 1.558662  | C                      | -1.704205 | 1.19415   | 1.552761  |
| H                  | -0.962775 | 1.946698  | 1.809558  | H                      | -0.978114 | 1.964714  | 1.793966  |
| H                  | -2.689856 | 1.646953  | 1.636739  | H                      | -2.700712 | 1.633882  | 1.635242  |
| H                  | -1.646944 | 0.398904  | 2.306493  | H                      | -1.631762 | 0.407879  | 2.304569  |
| O                  | 1.705701  | 1.471435  | -0.999134 | O                      | 1.704641  | 1.457098  | -0.987877 |
| O                  | 2.23013   | 0.213947  | -0.010754 | O                      | 2.213213  | 0.237891  | 0.03219   |
| H                  | 0.381385  | 2.854169  | -1.179061 | H                      | 0.384291  | 2.839626  | -1.209047 |
| S                  | 1.374903  | -0.984858 | 0.398929  | S                      | 1.37703   | -0.977428 | 0.400726  |
| O                  | 0.815821  | -1.749335 | -0.692904 | O                      | 0.86105   | -1.720267 | -0.711918 |
| O                  | 0.640378  | -0.856076 | 1.636142  | O                      | 0.620098  | -0.885839 | 1.614125  |

Table S20: Optimized coordinates of the transition state of *E*-4,1-ISOPO+OSO<sub>2</sub> calculated by G16 at the M06-2X/aug-cc-pVTZ and M06-2X/aug-cc-pV(T+d)Z levels of theory.

| M06-2X/aug-cc-pVTZ |           |           |           | M06-2X/aug-cc-pV(T+d)Z |           |           |           |
|--------------------|-----------|-----------|-----------|------------------------|-----------|-----------|-----------|
| Atom               | X         | Y         | Z         | Atom                   | X         | Y         | Z         |
| C                  | -1.527469 | 0.9681    | 0.259614  | C                      | -1.527163 | 0.96584   | 0.26167   |
| C                  | -0.166291 | 1.274375  | 0.888022  | C                      | -0.161159 | 1.261244  | 0.886043  |
| C                  | -1.866467 | -0.348449 | 0.23171   | C                      | -1.876493 | -0.347279 | 0.232542  |
| C                  | -3.185341 | -0.861428 | -0.225066 | C                      | -3.200415 | -0.849969 | -0.221784 |
| O                  | 0.112089  | 0.917518  | -0.387781 | O                      | 0.113408  | 0.901419  | -0.38955  |
| H                  | -3.344945 | -0.527096 | -1.260893 | H                      | -3.362695 | -0.509248 | -1.255003 |
| H                  | 0.191569  | 0.582228  | 1.644886  | H                      | 0.192322  | 0.567159  | 1.643211  |
| H                  | -0.046112 | 2.332448  | 1.114089  | H                      | -0.032519 | 2.318593  | 1.11092   |
| H                  | -1.112008 | -1.071034 | 0.535981  | H                      | -1.128003 | -1.076674 | 0.534906  |
| C                  | -2.375633 | 2.097207  | -0.225114 | C                      | -2.366085 | 2.103042  | -0.220148 |
| H                  | -3.020828 | 2.458169  | 0.577534  | H                      | -2.999296 | 2.475477  | 0.586763  |
| H                  | -1.742711 | 2.921375  | -0.547493 | H                      | -1.726039 | 2.917971  | -0.551976 |
| H                  | -3.003037 | 1.797955  | -1.063168 | H                      | -3.004763 | 1.807971  | -1.051112 |
| O                  | -3.333706 | -2.247077 | -0.087073 | O                      | -3.356006 | -2.235524 | -0.090506 |
| H                  | -3.981322 | -0.396905 | 0.364165  | H                      | -3.990982 | -0.384176 | 0.373683  |
| H                  | -2.730409 | -2.704977 | -0.678579 | H                      | -2.760233 | -2.693548 | -0.689479 |
| O                  | 2.054805  | 0.991572  | -0.469042 | O                      | 2.051026  | 0.972189  | -0.479752 |
| S                  | 2.447635  | -0.482812 | -0.259796 | S                      | 2.456241  | -0.482686 | -0.25476  |
| O                  | 3.888117  | -0.586539 | -0.053882 | O                      | 3.886221  | -0.571961 | -0.054594 |
| O                  | 1.573052  | -1.131222 | 0.734678  | O                      | 1.592881  | -1.128349 | 0.732441  |

(a) 1,2-ISOPOOSO<sub>2</sub>

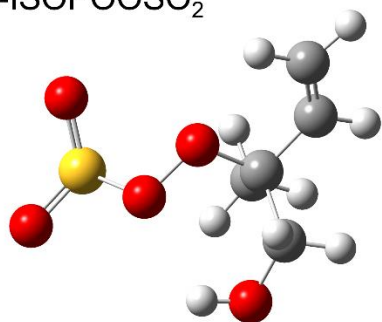

(b) 4,3-ISOPOOSO<sub>2</sub>

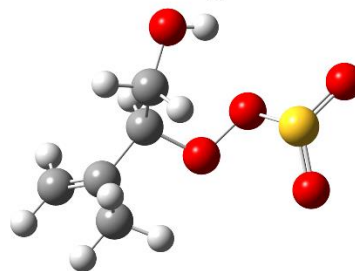

(c) Z-1,4-ISOPOOSO<sub>2</sub>

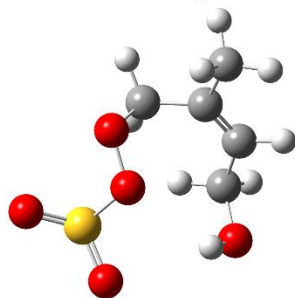

(d) Z-4,1-ISOPOOSO<sub>2</sub>

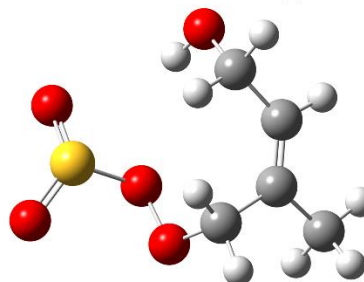

(e) E-1,4-ISOPOOSO<sub>2</sub>

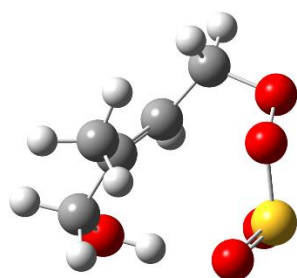

(f) E-4,1-ISOPOOSO<sub>2</sub>

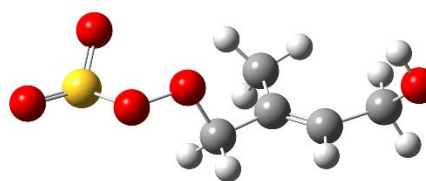

Figure S7: Optimized structures of the six isomers of ISOPOOSO<sub>2</sub>. The Cartesian coordinates of each structure are listed in Tables S21–S26.

Table S21: Optimized coordinates of 1,2-ISOPOOSO<sub>2</sub> calculated by G16 at the M06-2X/aug-cc-pVTZ and M06-2X/aug-cc-pV(T+d)Z levels of theory.

| M06-2X/aug-cc-pVTZ |           |           |           | M06-2X/aug-cc-pV(T+d)Z |           |           |           |
|--------------------|-----------|-----------|-----------|------------------------|-----------|-----------|-----------|
| Atom               | X         | Y         | Z         | Atom                   | X         | Y         | Z         |
| C                  | 1.366383  | 0.06483   | 0.235541  | C                      | 1.364084  | 0.065913  | 0.237199  |
| C                  | 1.817134  | 1.346349  | -0.484355 | C                      | 1.808211  | 1.34545   | -0.490422 |
| C                  | 2.507566  | -0.915751 | 0.215657  | C                      | 2.507846  | -0.911763 | 0.215387  |
| C                  | 2.585271  | -2.014513 | -0.516312 | C                      | 2.589223  | -2.007789 | -0.5203   |
| O                  | 1.011807  | 2.474868  | -0.249032 | O                      | 1.002802  | 2.473705  | -0.254245 |
| O                  | 0.324139  | -0.599053 | -0.518519 | O                      | 0.320582  | -0.604816 | -0.508841 |
| O                  | -0.756519 | 0.289622  | -0.695979 | O                      | -0.763258 | 0.284052  | -0.686623 |
| H                  | 0.16056   | 2.34653   | -0.675038 | H                      | 0.149264  | 2.343084  | -0.674876 |
| H                  | 1.788617  | -2.320339 | -1.179344 | H                      | 1.793892  | -2.313724 | -1.184879 |
| H                  | 3.459811  | -2.647333 | -0.459359 | H                      | 3.465481  | -2.638367 | -0.464867 |
| H                  | 1.902381  | 1.113953  | -1.550106 | H                      | 1.887251  | 1.109051  | -1.555785 |
| H                  | 2.810229  | 1.603261  | -0.115811 | H                      | 2.803208  | 1.605191  | -0.129087 |
| H                  | 3.322853  | -0.639723 | 0.87579   | H                      | 3.321834  | -0.635545 | 0.877016  |
| C                  | 0.903181  | 0.333819  | 1.6583    | C                      | 0.906713  | 0.339489  | 1.660851  |
| H                  | 1.735524  | 0.729949  | 2.239357  | H                      | 1.739619  | 0.743335  | 2.235771  |
| H                  | 0.113811  | 1.082659  | 1.679581  | H                      | 0.112822  | 1.083493  | 1.682116  |
| H                  | 0.561724  | -0.592267 | 2.11963   | H                      | 0.572286  | -0.586071 | 2.128224  |
| S                  | -2.06738  | -0.2178   | 0.204669  | S                      | -2.065152 | -0.220494 | 0.198623  |
| O                  | -3.089192 | 0.720689  | -0.199538 | O                      | -3.076975 | 0.713556  | -0.198248 |
| O                  | -2.222064 | -1.646162 | 0.055268  | O                      | -2.215612 | -1.637789 | 0.059471  |

Table S22: Optimized coordinates of 4,3-ISOPOOSO<sub>2</sub> calculated by G16 at the M06-2X/aug-cc-pVTZ and M06-2X/aug-cc-pV(T+d)Z levels of theory.

| M06-2X/aug-cc-pVTZ |           |           |           | M06-2X/aug-cc-pV(T+d)Z |           |           |           |
|--------------------|-----------|-----------|-----------|------------------------|-----------|-----------|-----------|
| Atom               | X         | Y         | Z         | Atom                   | X         | Y         | Z         |
| C                  | -1.267653 | 0.480824  | -0.388768 | C                      | -1.264454 | 0.476227  | -0.39052  |
| C                  | -0.841589 | 1.3181    | 0.81494   | C                      | -0.84501  | 1.325075  | 0.807628  |
| C                  | -2.451712 | -0.403901 | -0.095264 | C                      | -2.450005 | -0.406123 | -0.095407 |
| C                  | -2.318022 | -1.333544 | 1.075484  | C                      | -2.323572 | -1.323863 | 1.085491  |
| C                  | -3.540143 | -0.31747  | -0.846486 | C                      | -3.533721 | -0.327643 | -0.854305 |
| O                  | -0.149281 | 2.493868  | 0.472844  | O                      | -0.15581  | 2.500177  | 0.457336  |
| O                  | -0.243799 | -0.457716 | -0.788709 | O                      | -0.239301 | -0.466656 | -0.775715 |
| O                  | 0.982699  | 0.23406   | -0.931432 | O                      | 0.989256  | 0.227395  | -0.918264 |
| H                  | 0.600576  | 2.276028  | -0.087006 | H                      | 0.605621  | 2.278833  | -0.085139 |
| H                  | -1.474517 | 1.144535  | -1.230261 | H                      | -1.466731 | 1.131955  | -1.239329 |
| H                  | -3.594072 | 0.359907  | -1.688423 | H                      | -3.582466 | 0.341083  | -1.703441 |
| H                  | -4.412698 | -0.92253  | -0.637652 | H                      | -4.407494 | -0.930683 | -0.644715 |
| H                  | -2.200705 | -0.775297 | 2.006919  | H                      | -2.209779 | -0.756314 | 2.011706  |
| H                  | -3.197799 | -1.965802 | 1.167597  | H                      | -3.204859 | -1.953719 | 1.179724  |
| H                  | -1.438153 | -1.968688 | 0.964927  | H                      | -1.444327 | -1.961635 | 0.985747  |
| H                  | -0.26567  | 0.689714  | 1.506878  | H                      | -0.268993 | 0.704543  | 1.506406  |
| H                  | -1.740795 | 1.638977  | 1.340312  | H                      | -1.746989 | 1.647857  | 1.327014  |
| S                  | 2.080885  | -0.346216 | 0.183276  | S                      | 2.081413  | -0.349896 | 0.178877  |
| O                  | 3.293082  | 0.340888  | -0.198059 | O                      | 3.278365  | 0.346376  | -0.188774 |
| O                  | 1.985348  | -1.786283 | 0.240962  | O                      | 1.992988  | -1.777995 | 0.235752  |

Table S23: Optimized coordinates of Z-1,4-ISOPOOSO<sub>2</sub> calculated by G16 at the M06-2X/aug-cc-pVTZ and M06-2X/aug-cc-pV(T+d)Z levels of theory.

| M06-2X/aug-cc-pVTZ |           |           |           | M06-2X/aug-cc-pV(T+d)Z |           |           |           |
|--------------------|-----------|-----------|-----------|------------------------|-----------|-----------|-----------|
| Atom               | X         | Y         | Z         | Atom                   | X         | Y         | Z         |
| C                  | -2.232055 | 0.188592  | 0.107994  | C                      | -2.236368 | 0.189095  | 0.109214  |
| C                  | -1.626165 | -0.964553 | 0.873213  | C                      | -1.631085 | -0.962631 | 0.876612  |
| C                  | -1.684671 | 1.398796  | 0.005761  | C                      | -1.684057 | 1.39642   | -0.000055 |
| C                  | -0.384151 | 1.829846  | 0.598029  | C                      | -0.381849 | 1.8254    | 0.590245  |
| O                  | -1.324672 | -2.052596 | 0.021426  | O                      | -1.324544 | -2.049572 | 0.024869  |
| H                  | -0.518472 | -1.859624 | -0.468574 | H                      | -0.533955 | -1.841347 | -0.48385  |
| H                  | -0.10539  | 1.27114   | 1.492474  | H                      | -0.105394 | 1.27099   | 1.487844  |
| H                  | -2.36359  | -1.340526 | 1.58509   | H                      | -2.369555 | -1.341622 | 1.585613  |
| H                  | -0.747088 | -0.665218 | 1.446963  | H                      | -0.754159 | -0.66165  | 1.452785  |
| H                  | -2.187774 | 2.14462   | -0.599834 | H                      | -2.184703 | 2.14122   | -0.608947 |
| C                  | -3.520966 | -0.149658 | -0.577368 | C                      | -3.527871 | -0.147653 | -0.572077 |
| H                  | -3.380228 | -1.017544 | -1.221634 | H                      | -3.392516 | -1.020404 | -1.210933 |
| H                  | -4.278911 | -0.421597 | 0.16071   | H                      | -4.28586  | -0.411044 | 0.169038  |
| H                  | -3.892645 | 0.682185  | -1.171173 | H                      | -3.896716 | 0.681993  | -1.170709 |
| O                  | 0.704415  | 1.748791  | -0.344605 | O                      | 0.70671   | 1.736963  | -0.351301 |
| O                  | 0.818042  | 0.400689  | -0.739492 | O                      | 0.822428  | 0.383146  | -0.734022 |
| H                  | -0.38414  | 2.891301  | 0.843259  | H                      | -0.378288 | 2.888308  | 0.829381  |
| S                  | 1.998497  | -0.357056 | 0.149636  | S                      | 2.000612  | -0.358644 | 0.14441   |
| O                  | 1.893445  | -1.715357 | -0.342382 | O                      | 1.920675  | -1.703464 | -0.352583 |
| O                  | 3.230062  | 0.394726  | 0.091649  | O                      | 3.207071  | 0.411435  | 0.114986  |

Table S24: Optimized coordinates of Z-4,1-ISOPOOSO<sub>2</sub> calculated by G16 at the M06-2X/aug-cc-pVTZ and M06-2X/aug-cc-pV(T+d)Z levels of theory.

| M06-2X/aug-cc-pVTZ |           |           |           | M06-2X/aug-cc-pV(T+d)Z |           |           |           |
|--------------------|-----------|-----------|-----------|------------------------|-----------|-----------|-----------|
| Atom               | X         | Y         | Z         | Atom                   | X         | Y         | Z         |
| C                  | 2.079468  | -0.49084  | 0.111994  | C                      | 2.076005  | -0.49497  | 0.111025  |
| C                  | 0.974086  | -1.219836 | 0.819899  | C                      | 0.968828  | -1.219892 | 0.820394  |
| C                  | 2.176496  | 0.836002  | 0.101786  | C                      | 2.17803   | 0.831497  | 0.101255  |
| C                  | 1.248682  | 1.834957  | 0.727818  | C                      | 1.253782  | 1.833459  | 0.727702  |
| O                  | -0.052653 | -1.647553 | -0.092477 | O                      | -0.060802 | -1.6436   | -0.090501 |
| H                  | 1.816856  | 2.526207  | 1.350555  | H                      | 1.824028  | 2.52261   | 1.350854  |
| H                  | 0.511684  | -0.645582 | 1.622255  | H                      | 0.510206  | -0.6448   | 1.624115  |
| H                  | 1.32131   | -2.16991  | 1.22811   | H                      | 1.313031  | -2.1719   | 1.226815  |
| H                  | 2.981956  | 1.283908  | -0.47289  | H                      | 2.984567  | 1.276659  | -0.474051 |
| C                  | 3.024312  | -1.377431 | -0.645069 | C                      | 3.016626  | -1.3849   | -0.647382 |
| H                  | 3.564993  | -2.039271 | 0.034934  | H                      | 3.556075  | -2.048505 | 0.031888  |
| H                  | 2.470764  | -2.012711 | -1.339522 | H                      | 2.459782  | -2.018358 | -1.340855 |
| H                  | 3.748134  | -0.795246 | -1.210391 | H                      | 3.741592  | -0.805333 | -1.213931 |
| O                  | 0.624134  | 2.638107  | -0.256377 | O                      | 0.632737  | 2.638975  | -0.256942 |
| H                  | 0.503203  | 1.361678  | 1.371858  | H                      | 0.505975  | 1.362571  | 1.370724  |
| H                  | 0.06012   | 2.082427  | -0.80413  | H                      | 0.069707  | 2.084302  | -0.806616 |
| O                  | -0.607284 | -0.49388  | -0.681732 | O                      | -0.615161 | -0.484295 | -0.674823 |
| S                  | -1.986566 | -0.036177 | 0.13291   | S                      | -1.986198 | -0.035247 | 0.127178  |
| O                  | -2.842568 | -1.18171  | 0.335134  | O                      | -2.829103 | -1.173277 | 0.338418  |
| O                  | -2.398159 | 1.121315  | -0.630285 | O                      | -2.395851 | 1.11414   | -0.626372 |



Table S25: Optimized coordinates of *E*-1,4-ISOPOOSO<sub>2</sub> calculated by G16 at the M06-2X/aug-cc-pVTZ and M06-2X/aug-cc-pV(T+d)Z levels of theory.

| M06-2X/aug-cc-pVTZ |           |           |           | M06-2X/aug-cc-pV(T+d)Z |           |           |           |
|--------------------|-----------|-----------|-----------|------------------------|-----------|-----------|-----------|
| Atom               | X         | Y         | Z         | Atom                   | X         | Y         | Z         |
| C                  | -1.486234 | 0.564138  | 0.308829  | C                      | -1.499926 | 0.535822  | 0.330157  |
| C                  | -2.425782 | -0.598311 | 0.100268  | C                      | -2.424567 | -0.637753 | 0.117817  |
| C                  | -0.815747 | 1.078283  | -0.720209 | C                      | -0.8567   | 1.079079  | -0.70102  |
| C                  | 0.282408  | 2.078139  | -0.622403 | C                      | 0.230276  | 2.090952  | -0.603102 |
| O                  | -2.383833 | -1.175465 | -1.179151 | O                      | -2.399135 | -1.189733 | -1.173047 |
| H                  | -1.4907   | -1.500684 | -1.337793 | H                      | -1.504733 | -1.499001 | -1.354355 |
| H                  | 0.246137  | 2.684859  | 0.27997   | H                      | 0.19885   | 2.684488  | 0.30822   |
| H                  | -3.454153 | -0.266356 | 0.261877  | H                      | -3.454789 | -0.32664  | 0.306688  |
| H                  | -2.208717 | -1.342091 | 0.877804  | H                      | -2.179653 | -1.39265  | 0.876316  |
| H                  | -0.993536 | 0.667464  | -1.705422 | H                      | -1.045129 | 0.682765  | -1.690247 |
| C                  | -1.377045 | 0.990307  | 1.742488  | C                      | -1.367507 | 0.935406  | 1.769577  |
| H                  | -0.834727 | 1.921418  | 1.87527   | H                      | -0.846333 | 1.877606  | 1.908999  |
| H                  | -2.374399 | 1.110931  | 2.170256  | H                      | -2.356728 | 1.020616  | 2.223788  |
| H                  | -0.869141 | 0.21587   | 2.32051   | H                      | -0.825377 | 0.163251  | 2.319248  |
| O                  | 1.581609  | 1.439755  | -0.678525 | O                      | 1.535612  | 1.468538  | -0.685604 |
| O                  | 1.672705  | 0.620134  | 0.469839  | O                      | 1.648067  | 0.6348    | 0.453951  |
| H                  | 0.328946  | 2.732185  | -1.492716 | H                      | 0.258152  | 2.757804  | -1.464459 |
| S                  | 1.53618   | -0.997433 | 0.117232  | S                      | 1.565298  | -0.965502 | 0.086235  |
| O                  | 0.92387   | -1.195252 | -1.180421 | O                      | 0.920356  | -1.173438 | -1.179905 |
| O                  | 0.956377  | -1.556674 | 1.320845  | O                      | 1.072789  | -1.557823 | 1.297789  |

Table S26: Optimized coordinates of *E*-4,1-ISOPOOSO<sub>2</sub> calculated by G16 at the M06-2X/aug-cc-pVTZ and M06-2X/aug-cc-pV(T+d)Z levels of theory.

| M06-2X/aug-cc-pVTZ |           |           |           | M06-2X/aug-cc-pV(T+d)Z |           |           |           |
|--------------------|-----------|-----------|-----------|------------------------|-----------|-----------|-----------|
| Atom               | X         | Y         | Z         | Atom                   | X         | Y         | Z         |
| C                  | 1.536542  | 0.169955  | -0.466496 | C                      | 1.53629   | 0.173064  | -0.46881  |
| C                  | 0.296887  | -0.642043 | -0.70403  | C                      | 0.29451   | -0.635307 | -0.708167 |
| C                  | 2.710414  | -0.453881 | -0.403889 | C                      | 2.708067  | -0.454447 | -0.403488 |
| C                  | 4.059012  | 0.160902  | -0.194682 | C                      | 4.058251  | 0.156161  | -0.192238 |
| O                  | -0.488356 | -0.519168 | 0.490513  | O                      | -0.490208 | -0.510269 | 0.486477  |
| H                  | 3.991368  | 1.235005  | -0.014792 | H                      | 3.993792  | 1.230621  | -0.013327 |
| H                  | 0.511705  | -1.693365 | -0.890898 | H                      | 0.506772  | -1.687159 | -0.894924 |
| H                  | -0.283553 | -0.230877 | -1.537443 | H                      | -0.283965 | -0.221998 | -1.541689 |
| H                  | 2.728761  | -1.535805 | -0.49781  | H                      | 2.723152  | -1.536496 | -0.49654  |
| C                  | 1.296504  | 1.647689  | -0.351851 | C                      | 1.300862  | 1.651665  | -0.355688 |
| H                  | 1.017947  | 2.057995  | -1.325412 | H                      | 1.024124  | 2.061932  | -1.32976  |
| H                  | 0.46572   | 1.840474  | 0.327655  | H                      | 0.470351  | 1.847749  | 0.32319   |
| H                  | 2.167363  | 2.19009   | 0.003171  | H                      | 2.17322   | 2.191609  | -0.000618 |
| O                  | 4.761525  | -0.487127 | 0.85266   | O                      | 4.756656  | -0.493314 | 0.856956  |
| H                  | 4.670741  | 0.016677  | -1.086261 | H                      | 4.671187  | 0.009207  | -1.082547 |
| H                  | 4.240292  | -0.423433 | 1.657129  | H                      | 4.233977  | -0.427534 | 1.660317  |
| O                  | -1.75537  | -1.079078 | 0.244211  | O                      | -1.760605 | -1.068761 | 0.237506  |
| S                  | -2.842775 | 0.140031  | -0.107001 | S                      | -2.841259 | 0.137494  | -0.098247 |
| O                  | -4.106811 | -0.557991 | -0.122347 | O                      | -4.091744 | -0.559607 | -0.131546 |
| O                  | -2.58875  | 1.269239  | 0.760259  | O                      | -2.594142 | 1.25512   | 0.765381  |

(a) 1,2-ISOPO

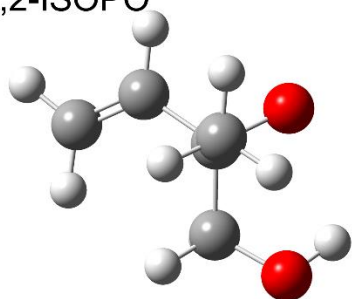

(b) 4,3-ISOPO

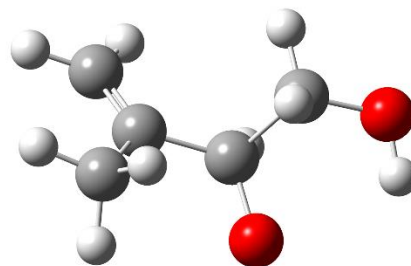

(c) Z-1,4-ISOPO

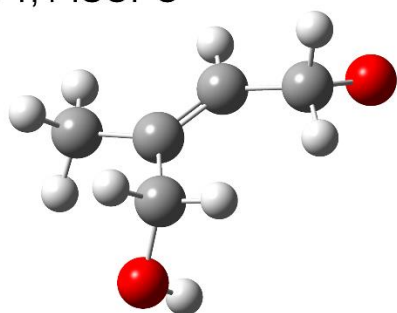

(d) Z-4,1-ISOPO

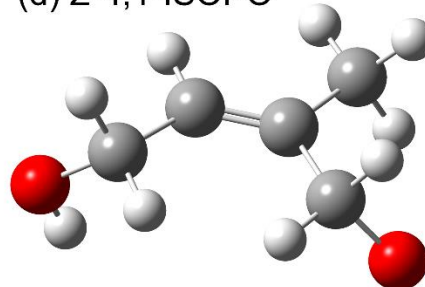

(e) E-1,4-ISOPO

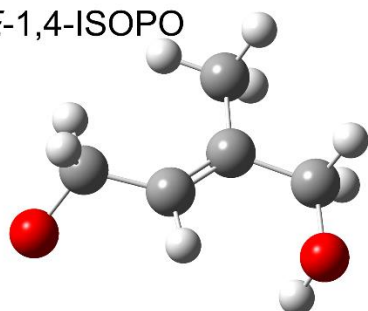

(f) E-4,1-ISOPO

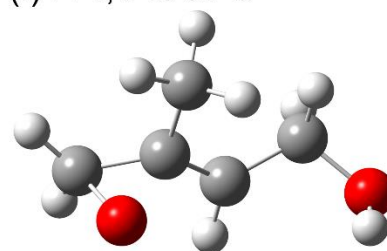

Figure S8: Optimized structures of the six isomers of ISOPO. The Cartesian coordinates of each structure are listed in Tables S27–S32.

Table S27: Optimized coordinates of 1,2-ISOPO calculated by G16 at the M06-2X/aug-cc-pVTZ and M06-2X/aug-cc-pV(T+d)Z levels of theory.

| Atom | X         | Y         | Z         |
|------|-----------|-----------|-----------|
| C    | 0.043547  | 0.322076  | 0.108387  |
| C    | -0.656089 | -1.025719 | -0.129551 |
| C    | 1.547014  | 0.232441  | 0.190259  |
| C    | 2.274331  | -0.830498 | -0.112064 |
| O    | -2.052935 | -0.883911 | -0.096412 |
| O    | -0.4589   | 0.904811  | 1.252472  |
| H    | -2.27073  | -0.399121 | 0.707227  |
| H    | 1.832657  | -1.761217 | -0.44356  |
| H    | 3.352683  | -0.803287 | -0.0387   |
| H    | -0.310666 | -1.736363 | 0.628208  |
| H    | -0.393651 | -1.415105 | -1.112902 |
| H    | 2.021622  | 1.14769   | 0.528799  |
| C    | -0.348617 | 1.326777  | -1.007268 |
| H    | 0.037749  | 0.937671  | -1.947974 |
| H    | -1.430627 | 1.412845  | -1.061791 |
| H    | 0.09452   | 2.299224  | -0.806374 |

Table S28: Optimized coordinates of 4,3-ISOPO calculated by G16 at the M06-2X/aug-cc-pVTZ and M06-2X/aug-cc-pV(T+d)Z levels of theory.

| Atom | X         | Y         | Z         |
|------|-----------|-----------|-----------|
| C    | 0.237036  | 0.001477  | 0.515454  |
| C    | 1.218191  | -0.443121 | -0.635849 |
| C    | -1.198827 | -0.182985 | 0.083276  |
| C    | -1.829267 | 0.975538  | -0.62515  |
| C    | -1.817367 | -1.331773 | 0.320606  |
| O    | 2.549378  | -0.383417 | -0.227322 |
| O    | 0.602291  | 1.274685  | 0.79441   |
| H    | 2.72516   | 0.502189  | 0.105367  |
| H    | 0.504631  | -0.658985 | 1.353015  |
| H    | -1.323932 | -2.135354 | 0.854903  |
| H    | -2.833866 | -1.506849 | -0.005836 |
| H    | -1.224188 | 1.289279  | -1.478355 |
| H    | -2.826525 | 0.720894  | -0.976244 |
| H    | -1.891607 | 1.836391  | 0.040656  |
| H    | 1.018167  | 0.184798  | -1.508177 |
| H    | 0.980205  | -1.477324 | -0.872061 |

Table S29: Optimized coordinates of Z-1,4-ISOPO calculated by G16 at the M06-2X/aug-cc-pVTZ and M06-2X/aug-cc-pV(T+d)Z levels of theory.

| Atom | X         | Y         | Z         |
|------|-----------|-----------|-----------|
| C    | -0.527821 | 0.494496  | 0.16981   |
| C    | -1.165833 | -0.818178 | 0.543947  |
| C    | 0.786674  | 0.691759  | 0.102181  |
| C    | 1.885463  | -0.297713 | 0.360984  |
| O    | -2.021906 | -1.300749 | -0.480776 |
| H    | -1.501791 | -1.417316 | -1.280255 |
| H    | 1.542892  | -1.332433 | 0.468788  |
| H    | -1.810234 | -0.670367 | 1.412345  |
| H    | -0.426027 | -1.57294  | 0.812951  |
| H    | 1.153677  | 1.673643  | -0.18142  |
| C    | -1.504147 | 1.595218  | -0.131407 |
| H    | -2.198021 | 1.287578  | -0.913471 |
| H    | -2.105304 | 1.818725  | 0.752926  |
| H    | -0.995602 | 2.504213  | -0.444737 |
| O    | 2.910647  | -0.226399 | -0.547079 |
| H    | 2.384467  | -0.067413 | 1.322625  |

Table S30: Optimized coordinates of Z-4,1-ISOPO calculated by G16 at the M06-2X/aug-cc-pVTZ and M06-2X/aug-cc-pV(T+d)Z levels of theory.

| Atom | X         | Y         | Z         |
|------|-----------|-----------|-----------|
| C    | 0.589808  | 0.447975  | 0.156673  |
| C    | 1.207863  | -0.90806  | 0.398287  |
| C    | -0.719133 | 0.683579  | 0.215575  |
| C    | -1.833049 | -0.285381 | 0.46863   |
| O    | 2.148652  | -1.272498 | -0.529021 |
| H    | -2.338124 | -0.036149 | 1.402712  |
| H    | 0.478245  | -1.712127 | 0.535874  |
| H    | 1.778337  | -0.88024  | 1.347833  |
| H    | -1.06219  | 1.700129  | 0.043014  |
| C    | 1.5834    | 1.533419  | -0.134953 |
| H    | 2.295285  | 1.632848  | 0.688214  |
| H    | 2.163417  | 1.289835  | -1.024648 |
| H    | 1.088281  | 2.490173  | -0.283201 |
| O    | -2.833789 | -0.188362 | -0.533658 |
| H    | -1.478032 | -1.313775 | 0.556734  |
| H    | -2.417464 | -0.313006 | -1.390363 |

Table S31: Optimized coordinates of *E*-1,4-ISOPO calculated by G16 at the M06-2X/aug-cc-pVTZ and M06-2X/aug-cc-pV(T+d)Z levels of theory.

| Atom | X         | Y         | Z         |
|------|-----------|-----------|-----------|
| C    | 0.52614   | 0.471163  | 0.040702  |
| C    | 1.933928  | -0.069635 | -0.021445 |
| C    | -0.509933 | -0.335438 | 0.240635  |
| C    | -1.956996 | 0.050009  | 0.306271  |
| O    | 2.04874   | -1.469671 | 0.034826  |
| H    | 1.600064  | -1.846821 | -0.726705 |
| H    | -2.151081 | 1.097695  | 0.05252   |
| H    | 2.500789  | 0.316729  | 0.829007  |
| H    | 2.416738  | 0.328405  | -0.923029 |
| H    | -0.327953 | -1.395279 | 0.379333  |
| C    | 0.465964  | 1.960981  | -0.132569 |
| H    | -0.545133 | 2.355853  | -0.120311 |
| H    | 1.026602  | 2.454027  | 0.6648    |
| H    | 0.934852  | 2.252274  | -1.07452  |
| O    | -2.783541 | -0.775748 | -0.413006 |
| H    | -2.331091 | -0.06201  | 1.342782  |



Table S32: Optimized coordinates of *E*-4,1-ISOPO calculated by G16 at the M06-2X/aug-cc-pVTZ and M06-2X/aug-cc-pV(T+d)Z levels of theory.

| Atom | X         | Y         | Z         |
|------|-----------|-----------|-----------|
| C    | -0.810338 | 0.079924  | -0.046424 |
| C    | -1.99651  | -0.654119 | -0.544943 |
| C    | 0.50778   | -0.530097 | -0.21844  |
| C    | 1.772644  | 0.20704   | -0.465138 |
| O    | -1.683049 | -0.659768 | 0.829286  |
| H    | 1.638131  | 1.279249  | -0.297487 |
| H    | -1.858583 | -1.600198 | -1.056353 |
| H    | -2.880377 | -0.087922 | -0.820501 |
| H    | 0.551926  | -1.612092 | -0.210978 |
| C    | -0.907946 | 1.574776  | 0.107844  |
| H    | -0.558929 | 2.084137  | -0.790284 |
| H    | -1.943485 | 1.853896  | 0.289322  |
| H    | -0.30745  | 1.915063  | 0.95182   |
| O    | 2.846671  | -0.294483 | 0.321105  |
| H    | 2.105118  | 0.083435  | -1.500156 |
| H    | 2.550895  | -0.346704 | 1.234091  |

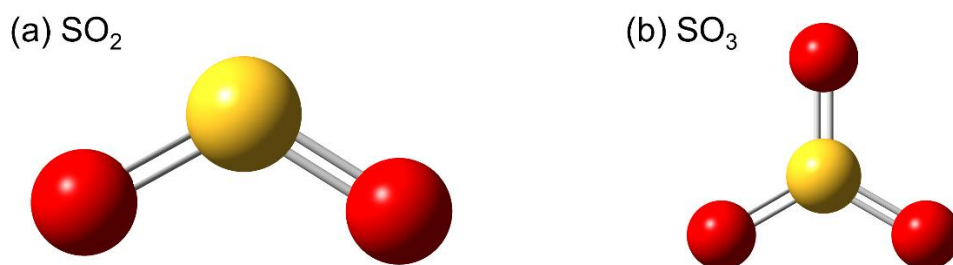

Figure S9: Optimized structures of SO<sub>2</sub> and SO<sub>3</sub>. The Cartesian coordinates of each structure are listed in Tables S33–S34.

Table S33: Optimized coordinates of SO<sub>2</sub> calculated by G16 at the M06-2X/aug-cc-pVTZ and M06-2X/aug-cc-pV(T+d)Z levels of theory.

| M06-2X/aug-cc-pVTZ |   |           |           | M06-2X/aug-cc-pV(T+d)Z |   |           |           |
|--------------------|---|-----------|-----------|------------------------|---|-----------|-----------|
| Atom               | X | Y         | Z         | Atom                   | X | Y         | Z         |
| S                  | 0 | 0         | 0.370193  | S                      | 0 | 0         | 0.362373  |
| O                  | 0 | 1.230522  | -0.370193 | O                      | 0 | 1.226801  | -0.362373 |
| O                  | 0 | -1.230522 | -0.370193 | O                      | 0 | -1.226801 | -0.362373 |

Table S34: Optimized coordinates of SO<sub>3</sub> calculated by G16 at the M06-2X/aug-cc-pVTZ and M06-2X/aug-cc-pV(T+d)Z levels of theory.

| M06-2X/aug-cc-pVTZ |           |           |   | M06-2X/aug-cc-pV(T+d)Z |           |           |   |
|--------------------|-----------|-----------|---|------------------------|-----------|-----------|---|
| Atom               | X         | Y         | Z | Atom                   | X         | Y         | Z |
| S                  | 0         | 0         | 0 | S                      | 0         | 0         | 0 |
| O                  | 0         | 1.4263524 | 0 | O                      | 0         | 1.415585  | 0 |
| O                  | -1.235257 | -0.713176 | 0 | O                      | 1.225933  | -0.707792 | 0 |
| O                  | 1.2352574 | -0.713176 | 0 | O                      | -1.225933 | -0.707792 | 0 |

Table S35: Vibrational frequencies of ISOPOOs calculated by G16 at the M06-2X/aug-cc-pVTZ level of theory.

| 1,2-ISOPOO |              | 4,3-ISOPOO |             | <i>E</i> -1,4-ISOPOO |           | <i>Z</i> -1,4-ISOPOO |             | <i>E</i> -4,1-ISOPOO |             | <i>Z</i> -4,1-ISOPOO |             |
|------------|--------------|------------|-------------|----------------------|-----------|----------------------|-------------|----------------------|-------------|----------------------|-------------|
| Freq.      | Intensity    | Freq.      | Intensity   | Freq.                | Intensity | Freq.                | Intensity   | Freq.                | Intensity   | Freq.                | Intensity   |
| 68.0794    | 1.066505178  | 51.6663    | 74.55850574 | 54.9071              | 372.5281  | 62.5199              | 118.4697225 | 41.486               | 505.0454399 | 34.7671              | 208.2531282 |
| 92.565     | 28.40611271  | 73.2788    | 12.30374694 | 75.7794              | 219.8029  | 99.762               | 131.6402767 | 63.2509              | 75.2014361  | 95.5791              | 108.4635456 |
| 162.0164   | 131.5579929  | 143.6606   | 79.41550204 | 119.9619             | 72.77974  | 127.6349             | 95.15986906 | 90.9529              | 84.66288434 | 129.1149             | 64.87352561 |
| 224.5161   | 3.48980607   | 190.0684   | 11.46853836 | 146.9799             | 55.75335  | 159.5643             | 41.69052951 | 133.3771             | 9.81967043  | 146.9822             | 7.070502561 |
| 245.9977   | 75.36788131  | 207.5666   | 23.02344953 | 152.3166             | 30.2433   | 205.0727             | 15.14071835 | 187.9693             | 84.1709318  | 200.5371             | 8.088722641 |
| 262.5079   | 7.39498039   | 226.4178   | 106.646322  | 236.3628             | 86.16024  | 240.6813             | 32.96025375 | 236.9746             | 78.35208228 | 227.6645             | 86.99013457 |
| 320.9483   | 52.6784724   | 312.545    | 53.43874046 | 319.1585             | 979.9857  | 313.6211             | 11.53743622 | 295.2537             | 146.4553274 | 314.2169             | 23.87415464 |
| 324.0103   | 31.31700528  | 360.0373   | 29.49853736 | 329.7215             | 263.1633  | 388.5626             | 37.63803287 | 345.5986             | 973.6420049 | 386.6105             | 31.88232377 |
| 392.7227   | 81.05109264  | 417.2427   | 54.41355973 | 384.1586             | 354.0094  | 394.1968             | 31.51366158 | 350.4417             | 224.8641325 | 438.6272             | 18.52508147 |
| 447.2126   | 43.90443642  | 489.2456   | 953.6168429 | 435.2436             | 85.77812  | 488.2901             | 341.3802202 | 442.6079             | 77.79366338 | 478.4865             | 26.31325686 |
| 488.2658   | 685.5928314  | 535.8875   | 38.15811011 | 470.0076             | 74.84752  | 516.4122             | 442.9092147 | 503.1562             | 44.38670238 | 502.6372             | 734.4170389 |
| 516.2753   | 294.62912255 | 550.7283   | 43.21902775 | 574.7555             | 58.69685  | 567.7482             | 39.96366479 | 544.5858             | 10.83523971 | 537.7509             | 42.11209003 |
| 602.6739   | 57.60682481  | 558.3402   | 40.68063534 | 616.2259             | 10.87036  | 649.533              | 46.49515456 | 611.9552             | 67.63566676 | 655.1876             | 53.52664584 |
| 687.7454   | 109.404481   | 741.1967   | 2.86826678  | 804.9285             | 5.158427  | 791.8073             | 19.8767701  | 824.3061             | 11.11679972 | 796.8912             | 37.0453856  |
| 778.7684   | 17.99194925  | 856.411    | 75.02011095 | 857.513              | 45.52171  | 878.7629             | 32.65923591 | 883.6667             | 64.86299432 | 900.5033             | 15.62482411 |
| 872.8685   | 27.94278611  | 884.4988   | 0.909737192 | 922.2159             | 154.9613  | 919.0381             | 160.2434128 | 938.6359             | 72.91571081 | 930.549              | 117.8651589 |
| 939.1561   | 12.0477617   | 976.5118   | 157.3376442 | 973.1189             | 52.52652  | 958.8486             | 91.22475583 | 978.7234             | 152.9112873 | 964.6506             | 79.46614954 |
| 982.347    | 35.95646508  | 993.0029   | 3.383545493 | 987.1298             | 57.48867  | 995.3155             | 54.95125959 | 995.6205             | 11.13730589 | 993.7919             | 50.48286752 |
| 995.4191   | 164.7412367  | 1024.788   | 113.9926818 | 1031.7231            | 22.64359  | 1057.6803            | 88.16894648 | 1054.6201            | 125.6999376 | 1063.9538            | 22.35846869 |
| 1040.5328  | 34.12293756  | 1055.7271  | 81.89523432 | 1066.1052            | 66.15647  | 1071.3416            | 1.264209675 | 1071.3006            | 66.19498787 | 1077.485             | 8.730144846 |
| 1047.2176  | 22.35388803  | 1076.6906  | 3.418084172 | 1127.5333            | 122.4919  | 1102.4308            | 273.6829643 | 1089.2137            | 310.5105403 | 1090.5031            | 322.673836  |
| 1124.4941  | 448.215495   | 1107.0528  | 5.230654147 | 1140.122             | 209.0315  | 1123.5434            | 14.17095682 | 1139.3669            | 46.66196932 | 1133.1268            | 77.30960176 |
| 1164.3874  | 18.31839825  | 1131.3566  | 376.8393792 | 1219.9033            | 47.19275  | 1199.6425            | 52.79246325 | 1197.4632            | 6.79700935  | 1189.3171            | 38.20246762 |
| 1213.892   | 86.81194962  | 1232.2502  | 75.93953089 | 1226.5315            | 4.725355  | 1243.1467            | 16.18676256 | 1238.4382            | 11.79419424 | 1239.5725            | 5.895080126 |
| 1223.7355  | 21.54707622  | 1280.7493  | 47.88245108 | 1253.874             | 11.4581   | 1273.0391            | 36.60355549 | 1252.0509            | 17.04601481 | 1275.6705            | 18.66275565 |
| 1280.3172  | 132.3441359  | 1299.9689  | 54.87639462 | 1296.6055            | 31.87289  | 1299.9756            | 17.14797937 | 1317.2772            | 82.09372808 | 1301.3128            | 36.66205736 |
| 1313.5598  | 4.223375303  | 1316.3932  | 16.26678827 | 1352.7524            | 5.058585  | 1359.6648            | 2.704656706 | 1348.2354            | 4.379877598 | 1352.7196            | 3.064775415 |
| 1331.2706  | 10.23996912  | 1345.9411  | 48.57644744 | 1381.7674            | 33.17416  | 1386.6385            | 44.21186031 | 1373.0948            | 65.7417759  | 1378.2533            | 18.13915966 |
| 1379.5987  | 10.04695228  | 1393.7552  | 18.76262053 | 1390.8621            | 68.69615  | 1400.4987            | 11.010804   | 1392.2429            | 65.5032449  | 1399.6829            | 6.297550356 |
| 1407.8314  | 45.26496367  | 1417       | 14.35028755 | 1418.1423            | 63.54517  | 1412.6079            | 23.13052439 | 1423.2866            | 81.52904911 | 1417.325             | 11.04108812 |
| 1438.7268  | 80.55759584  | 1437.6452  | 132.1912531 | 1432.69              | 8.549405  | 1428.9275            | 123.1253597 | 1433.1705            | 35.16543028 | 1434.5479            | 178.6600796 |
| 1456.6476  | 30.75153577  | 1460.6996  | 4.545461699 | 1478.9303            | 9.696662  | 1479.7495            | 27.93886678 | 1473.9947            | 15.46127104 | 1481.5115            | 21.05760747 |
| 1488.2851  | 20.0704912   | 1484.8553  | 24.97391201 | 1483.2861            | 16.75197  | 1489.0624            | 14.73228881 | 1485.5026            | 14.09915831 | 1489.0721            | 33.28078692 |
| 1489.3819  | 1.690706484  | 1498.7478  | 35.11207225 | 1492.6951            | 13.17518  | 1495.9625            | 27.82407759 | 1492.4762            | 28.40202211 | 1498.1183            | 12.36988346 |
| 1499.2508  | 21.58916762  | 1499.9618  | 9.192603584 | 1506.8527            | 41.91659  | 1527.024             | 15.66865411 | 1513.8684            | 11.15863462 | 1531.308             | 13.03001818 |
| 1736.1037  | 11.90198708  | 1753.4796  | 25.52015466 | 1764.8913            | 51.73539  | 1758.2354            | 48.97067092 | 1765.7682            | 9.251827242 | 1767.3055            | 8.126625286 |
| 3042.8959  | 35.44562533  | 3036.789   | 34.43757834 | 3017.5448            | 46.3969   | 3056.2916            | 14.6429287  | 3065.0414            | 3.310178928 | 3051.7227            | 17.6970428  |
| 3078.3333  | 7.809974464  | 3060.2444  | 14.80430571 | 3059.9798            | 19.91479  | 3071.5251            | 38.34063363 | 3073.6624            | 38.29619147 | 3058.2417            | 44.82760365 |
| 3116.0331  | 14.3089305   | 3106.339   | 8.263033379 | 3082.2545            | 14.77858  | 3110.3292            | 16.46125631 | 3088.9602            | 12.61177255 | 3104.8327            | 8.809526653 |
| 3153.7076  | 9.065904922  | 3114.6078  | 16.90193263 | 3110.9016            | 11.25877  | 3114.706             | 10.84296322 | 3108.1283            | 15.95295191 | 3109.2078            | 21.41954079 |
| 3173.0965  | 4.110475633  | 3117.0454  | 3.996250561 | 3111.9927            | 21.43101  | 3119.7585            | 39.02699929 | 3117.5777            | 6.490750947 | 3116.673             | 29.08751198 |
| 3174.1766  | 4.62060636   | 3156.7505  | 14.29510145 | 3164.3087            | 5.647901  | 3153.097             | 13.53316832 | 3156.1147            | 1.814376715 | 3153.0718            | 8.726623896 |
| 3184.7225  | 3.738585239  | 3166.9265  | 3.049371141 | 3180.9769            | 13.62801  | 3167.5833            | 1.449117579 | 3161.9169            | 15.91006429 | 3165.6117            | 17.70042807 |
| 3268.177   | 2.855536076  | 3252.0947  | 7.905695506 | 3198.1201            | 3.687497  | 3182.3528            | 16.33929673 | 3177.0357            | 16.14915535 | 3179.4859            | 7.298515389 |
| 3848.1863  | 72.28483732  | 3850.3186  | 81.74458852 | 3869.1813            | 41.01009  | 3824.9097            | 89.44815601 | 3872.0786            | 38.8187687  | 3824.7013            | 86.95479406 |

Table S36: Vibrational frequencies of ISOPOOs calculated by G16 at the M06-2X/aug-cc-pV(T+d)Z level of theory.

| 1,2-ISOPOO |             | 4,3-ISOPOO |             | <i>E</i> -1,4-ISOPOO |           | Z-1,4-ISOPOO |             | <i>E</i> -4,1-ISOPOO |             | Z-4,1-ISOPOO |             |
|------------|-------------|------------|-------------|----------------------|-----------|--------------|-------------|----------------------|-------------|--------------|-------------|
| Freq.      | Intensity   | Freq.      | Intensity   | Freq.                | Intensity | Freq.        | Intensity   | Freq.                | Intensity   | Freq.        | Intensity   |
| 68.0795    | 1.066503611 | 51.5564    | 75.32099652 | 54.9071              | 372.5281  | 62.5184      | 118.4661838 | 41.4842              | 505.0673539 | 34.7665      | 208.2567222 |
| 92.562     | 28.40703338 | 73.1481    | 11.69853682 | 75.7794              | 219.8029  | 99.7615      | 131.6409365 | 63.2506              | 75.20179279 | 95.5785      | 108.4642265 |
| 162.0151   | 131.5590485 | 143.7296   | 79.60497859 | 119.9619             | 72.77974  | 127.6346     | 95.16009272 | 90.9517              | 84.65961508 | 129.1148     | 64.87357585 |
| 224.5147   | 3.489827831 | 190.1612   | 11.38531923 | 146.9799             | 55.75335  | 159.5635     | 41.69323872 | 133.3764             | 9.819721967 | 146.981      | 7.070560287 |
| 245.9973   | 75.36800386 | 207.7383   | 23.15613144 | 152.3166             | 30.2433   | 205.0746     | 15.14057808 | 187.9688             | 84.17540044 | 200.5373     | 8.088714574 |
| 262.5075   | 7.394991658 | 226.3432   | 106.1297953 | 236.3628             | 86.16024  | 240.6816     | 32.96021267 | 236.9744             | 78.35383188 | 227.6645     | 86.99013457 |
| 320.9483   | 52.68717342 | 312.6458   | 53.03870775 | 319.1585             | 979.9857  | 313.6208     | 11.53617521 | 295.2531             | 146.470488  | 314.217      | 23.87287742 |
| 324.0103   | 31.31208025 | 360.0511   | 29.63812385 | 329.7215             | 263.1633  | 388.5624     | 37.63599883 | 345.5971             | 973.7616657 | 386.6116     | 31.88223306 |
| 392.7224   | 81.05623371 | 417.2896   | 54.4265646  | 384.1586             | 354.0094  | 394.1965     | 31.51267353 | 350.4412             | 224.7369534 | 438.6273     | 18.52598677 |
| 447.2124   | 43.90713223 | 489.6855   | 952.2656645 | 435.2436             | 85.77812  | 488.2914     | 341.3392777 | 442.6078             | 77.79187828 | 478.4866     | 26.31575262 |
| 488.2633   | 685.6396458 | 535.9854   | 38.42355813 | 470.0076             | 74.84752  | 516.4137     | 442.9473267 | 503.156              | 44.38672002 | 502.6361     | 734.416265  |
| 516.274    | 294.5835006 | 550.7875   | 43.32158003 | 574.7555             | 58.69685  | 567.7479     | 39.9636859  | 544.5856             | 10.83524369 | 537.7513     | 42.11205871 |
| 602.6736   | 57.60552959 | 558.3667   | 40.48436711 | 616.2259             | 10.87036  | 649.5328     | 46.49578307 | 611.9548             | 67.6363288  | 655.1873     | 53.52667035 |
| 687.7451   | 109.4033685 | 741.2913   | 2.857675541 | 804.9285             | 5.158427  | 791.8072     | 19.87677261 | 824.3059             | 11.11680241 | 796.8915     | 37.04537166 |
| 778.7687   | 17.99143005 | 856.5033   | 74.97429854 | 857.513              | 45.52171  | 878.7628     | 32.65923963 | 883.6658             | 64.861706   | 900.5035     | 15.62570668 |
| 872.868    | 27.94280212 | 884.5026   | 0.910184317 | 922.2159             | 154.9613  | 919.0381     | 160.2429788 | 938.636              | 72.91740312 | 930.5483     | 117.8656763 |
| 939.1561   | 12.04818649 | 976.5776   | 157.3911788 | 973.1189             | 52.52652  | 958.8482     | 91.22437783 | 978.7234             | 152.9125101 | 964.6508     | 79.46447883 |
| 982.3468   | 35.95687851 | 993.0416   | 3.336812352 | 987.1298             | 57.48867  | 995.3151     | 54.95088086 | 995.6199             | 11.13530913 | 993.7925     | 50.48323847 |
| 995.4176   | 164.7418857 | 1024.8489  | 114.0579224 | 1031.7231            | 22.64359  | 1057.68      | 88.17198896 | 1054.6198            | 125.6992168 | 1063.9544    | 22.35770617 |
| 1040.53    | 34.12724679 | 1055.7588  | 81.86027852 | 1066.1052            | 66.15647  | 1071.3421    | 1.264581459 | 1071.3007            | 66.19088542 | 1077.4853    | 8.730512666 |
| 1047.2171  | 22.35008918 | 1076.7259  | 3.422047742 | 1127.5333            | 122.4919  | 1102.4292    | 273.6808284 | 1089.2142            | 310.5144267 | 1090.5029    | 322.6749927 |
| 1124.4948  | 448.2166351 | 1107.0432  | 5.286195733 | 1140.122             | 209.0315  | 1123.5433    | 14.16989286 | 1139.3665            | 46.66338627 | 1133.1271    | 77.30852508 |
| 1164.3881  | 18.31838724 | 1131.3255  | 376.663197  | 1219.9033            | 47.19275  | 1199.6422    | 52.7921439  | 1197.4628            | 6.796345312 | 1189.3169    | 38.20280948 |
| 1213.892   | 86.81260691 | 1232.1984  | 76.12662044 | 1226.5315            | 4.725355  | 1243.1472    | 16.1880397  | 1238.4386            | 11.7938683  | 1239.5727    | 5.895401011 |
| 1223.7354  | 21.54675197 | 1280.76    | 47.71384822 | 1253.874             | 11.4581   | 1273.0396    | 36.60197424 | 1252.0503            | 17.04602298 | 1275.6711    | 18.66274688 |
| 1280.3169  | 132.3426089 | 1300.1662  | 55.43510283 | 1296.6055            | 31.87289  | 1299.9756    | 17.14797937 | 1317.2779            | 82.09368446 | 1301.3131    | 36.66143577 |
| 1313.5614  | 4.223977576 | 1316.3911  | 15.94799969 | 1352.7524            | 5.058585  | 1359.6648    | 2.704363296 | 1348.2356            | 4.379876948 | 1352.7195    | 3.064775642 |
| 1331.2703  | 10.2402711  | 1345.9521  | 48.53218329 | 1381.7674            | 33.17416  | 1386.6386    | 44.21185712 | 1373.0948            | 65.74206644 | 1378.2534    | 18.13886889 |
| 1379.5992  | 10.04665947 | 1393.692   | 18.78980606 | 1390.8621            | 68.69615  | 1400.4989    | 11.01051758 | 1392.2426            | 65.50411865 | 1399.6833    | 6.297833578 |
| 1407.8323  | 45.26606822 | 1417.0147  | 14.33324656 | 1418.1423            | 63.54517  | 1412.6083    | 23.13023543 | 1423.2866            | 81.52764763 | 1417.3257    | 11.04108267 |
| 1438.7263  | 80.5562374  | 1437.6171  | 132.1341743 | 1432.69              | 8.549405  | 1428.927     | 123.1267987 | 1433.1702            | 35.165716   | 1434.5479    | 178.6592453 |
| 1456.6466  | 30.75155688 | 1460.7301  | 4.544001241 | 1478.9303            | 9.696662  | 1479.7492    | 27.93860285 | 1473.9946            | 15.46100143 | 1481.5113    | 21.05734104 |
| 1488.2847  | 20.07049659 | 1484.8792  | 24.97942074 | 1483.2861            | 16.75197  | 1489.0622    | 14.73121914 | 1485.5026            | 14.09969542 | 1489.072     | 33.2818608  |
| 1489.3816  | 1.690438969 | 1498.7633  | 34.67065006 | 1492.6951            | 13.17518  | 1495.9626    | 27.82514244 | 1492.4759            | 28.40176052 | 1498.1182    | 12.36908541 |
| 1499.2506  | 21.58890441 | 1499.9776  | 9.627889491 | 1506.8527            | 41.91659  | 1527.0236    | 15.66865822 | 1513.8684            | 11.15837109 | 1531.3079    | 13.03001903 |
| 1736.1027  | 11.90199394 | 1753.5617  | 25.53056246 | 1764.8913            | 51.73539  | 1758.2351    | 48.97067927 | 1765.7681            | 9.251827765 | 1767.3036    | 8.126408289 |
| 3042.8952  | 35.44563348 | 3036.6486  | 34.43549207 | 3017.5448            | 46.3969   | 3056.2891    | 14.64241855 | 3065.04              | 3.309789966 | 3051.7233    | 17.6969086  |
| 3078.3348  | 7.809970658 | 3060.1108  | 14.80195359 | 3059.9798            | 19.91479  | 3071.5266    | 38.34087467 | 3073.6615            | 38.29840917 | 3058.2423    | 44.82733396 |
| 3116.0389  | 14.30890386 | 3106.1505  | 8.263663265 | 3082.2545            | 14.77858  | 3110.3322    | 16.45610992 | 3088.9606            | 12.61164176 | 3104.8334    | 8.808625238 |
| 3153.7089  | 9.065774687 | 3114.4671  | 16.90205574 | 3110.9016            | 11.25877  | 3114.7014    | 10.84759021 | 3108.1283            | 15.95179672 | 3109.2072    | 21.42031478 |
| 3173.0962  | 4.110853199 | 3116.9046  | 4.002190736 | 3111.9927            | 21.43101  | 3119.7612    | 39.02645401 | 3117.5764            | 6.490881619 | 3116.6725    | 29.08751665 |
| 3174.1776  | 4.62085627  | 3156.6351  | 14.29069517 | 3164.3087            | 5.647901  | 3153.1021    | 13.53327295 | 3156.1181            | 1.812225926 | 3153.0719    | 8.725990999 |
| 3184.7239  | 3.738082528 | 3166.815   | 3.049730456 | 3180.9769            | 13.62801  | 3167.585     | 1.450124357 | 3161.9199            | 15.91181558 | 3165.6107    | 17.70106377 |
| 3268.18    | 2.855411387 | 3251.9719  | 7.907711506 | 3198.1201            | 3.687497  | 3182.3543    | 16.33878759 | 3177.04              | 16.14875679 | 3179.4846    | 7.298643846 |
| 3848.1885  | 72.284796   | 3850.2354  | 81.64191166 | 3869.1813            | 41.01009  | 3824.9069    | 89.44811719 | 3872.0803            | 38.81875165 | 3824.6995    | 86.95441776 |

Table S37: Vibrational frequencies of transition state of ISOPOO-SO<sub>2</sub>s calculated by G16 at the M06-2X/aug-cc-pVTZ level of theory.

| 1,2-ISOPOO-SO <sub>2</sub> |             | 4,3-ISOPOO-SO <sub>2</sub> |             | E-1,4-ISOPOO-SO <sub>2</sub> |             | Z-1,4-ISOPOO-SO <sub>2</sub> |             | E-4,1-ISOPOO-SO <sub>2</sub> |             | Z-4,1-ISOPOO-SO <sub>2</sub> |             |
|----------------------------|-------------|----------------------------|-------------|------------------------------|-------------|------------------------------|-------------|------------------------------|-------------|------------------------------|-------------|
| Freq.                      | Intensity   | Freq.                      | Intensity   | Freq.                        | Intensity   | Freq.                        | Intensity   | Freq.                        | Intensity   | Freq.                        | Intensity   |
| -480.83                    | 289.4514    | -496.84                    | 279.8728    | -555.18                      | 155.661     | -471.79                      | 197.6941    | -451.44                      | 212.4531    | -458.39                      | 183.3175    |
| 29.8298                    | 83.14532316 | 31.6804                    | 180.9813619 | 43.5119                      | 39.92890602 | 25.9695                      | 315.5939856 | 26.0816                      | 292.0280009 | 20.8076                      | 434.3978969 |
| 41.6762                    | 122.3635238 | 39.0027                    | 172.9437479 | 65.8359                      | 266.5560918 | 37.2953                      | 107.4064004 | 34.6416                      | 150.9198561 | 33.0571                      | 29.0602289  |
| 70.2201                    | 10.30583391 | 57.6337                    | 4.243178216 | 85.1274                      | 88.8304208  | 56.3753                      | 20.95351278 | 52.488                       | 171.0512658 | 49.4288                      | 23.09112491 |
| 79.8791                    | 15.66710144 | 77.8144                    | 62.94698825 | 95.5501                      | 48.52822334 | 97.1551                      | 32.67725984 | 63.1874                      | 104.2122218 | 91.3417                      | 59.73939348 |
| 151.1412                   | 96.68022207 | 164.8337                   | 59.33015382 | 118.3358                     | 33.93838854 | 115.835                      | 94.71094952 | 82.5064                      | 14.32203452 | 108.7967                     | 45.758456   |
| 174.7116                   | 14.34671987 | 185.2547                   | 8.374830151 | 158.2315                     | 69.56608067 | 132.5698                     | 15.20890462 | 126.4895                     | 15.69713758 | 146.9027                     | 12.48123447 |
| 207.8727                   | 36.533017   | 197.3424                   | 19.75469608 | 167.0259                     | 49.47996475 | 178.3492                     | 11.81054821 | 158.6217                     | 91.67316645 | 149.664                      | 14.42872575 |
| 234.2637                   | 10.18194754 | 206.1445                   | 8.122215664 | 210.4512                     | 15.38501527 | 220.3676                     | 111.6489473 | 212.2745                     | 72.76873442 | 205.6064                     | 2.46419114  |
| 247.7416                   | 53.83896468 | 223.3368                   | 21.66745042 | 258.8883                     | 41.3889792  | 245.208                      | 57.13990813 | 230.67                       | 63.13303097 | 233.5933                     | 104.6410012 |
| 277.0314                   | 11.94235477 | 277.4031                   | 72.10316583 | 292.7637                     | 50.62993132 | 277.1372                     | 66.58419603 | 258.7859                     | 129.2308366 | 286.1174                     | 114.0862016 |
| 317.8015                   | 93.04491148 | 309.1905                   | 80.09490354 | 332.0931                     | 45.80514401 | 322.3138                     | 19.42999658 | 288.1383                     | 391.1415805 | 318.8641                     | 76.5202273  |
| 352.0457                   | 198.035403  | 353.6711                   | 48.18349567 | 380.3685                     | 8.466110043 | 367.1103                     | 430.9036856 | 328.3767                     | 1054.880505 | 378.4624                     | 36.13372248 |
| 373.4855                   | 49.40101829 | 389.5142                   | 551.1824992 | 410.66                       | 32.22332626 | 378.9891                     | 40.71197131 | 364.8274                     | 60.29901827 | 404.1948                     | 606.3804134 |
| 404.7085                   | 877.1245768 | 424.9726                   | 24.22048909 | 437.7347                     | 20.84219712 | 412.6396                     | 91.26006756 | 408.1468                     | 29.21084795 | 416.2178                     | 184.4245805 |
| 432.4327                   | 437.7220714 | 432.6663                   | 117.7779911 | 445.9549                     | 740.4372607 | 436.0397                     | 418.7195851 | 418.4856                     | 43.21852898 | 461.3028                     | 210.4214905 |
| 485.5874                   | 164.2990837 | 523.8276                   | 443.3344123 | 478.2622                     | 142.888937  | 501.3242                     | 19.52506073 | 471.6283                     | 82.88922221 | 489.5786                     | 9.648798898 |
| 506.3771                   | 76.57011391 | 535.8443                   | 102.3681997 | 515.5608                     | 332.4273428 | 521.7314                     | 515.6870884 | 524.3224                     | 450.9576461 | 515.1992                     | 12.33834565 |
| 529.9269                   | 419.0212969 | 551.5477                   | 96.19004885 | 580.0616                     | 87.1171232  | 577.9406                     | 52.6923788  | 532.8164                     | 75.58357594 | 522.7435                     | 490.3742016 |
| 607.5517                   | 44.73391927 | 562.093                    | 20.99694046 | 606.3489                     | 7.630102338 | 657.4251                     | 40.26079153 | 620.3566                     | 39.37651214 | 674.1911                     | 31.79488736 |
| 686.6763                   | 114.6600634 | 743.8202                   | 0.10136806  | 812.3557                     | 7.91784365  | 792.1771                     | 16.36898781 | 836.3712                     | 13.19303469 | 798.6431                     | 47.5484931  |
| 783.3449                   | 26.72483318 | 861.2456                   | 69.79871446 | 870.243                      | 26.2928731  | 886.2841                     | 31.09922271 | 896.3696                     | 44.92630392 | 910.9603                     | 1.818298557 |
| 876.1314                   | 23.19787188 | 884.1191                   | 11.27484665 | 913.7294                     | 119.879783  | 931.0714                     | 110.6126646 | 958.513                      | 100.8402764 | 937.9731                     | 71.47138098 |
| 938.3515                   | 16.59911478 | 979.521                    | 157.827278  | 973.4639                     | 49.89697922 | 955.2224                     | 102.0095731 | 989.4514                     | 122.3452446 | 966.4533                     | 96.71649931 |
| 976.0301                   | 73.03641986 | 993.1564                   | 8.064303076 | 982.0894                     | 851.4825126 | 1000.4627                    | 98.80795856 | 1022.9475                    | 61.64851785 | 1000.9204                    | 64.9845202  |
| 999.7583                   | 125.6341491 | 1023.0605                  | 1382.166073 | 1004.6329                    | 285.7599214 | 1040.3545                    | 1408.724577 | 1053.2697                    | 484.2111778 | 1043.1467                    | 1331.31257  |
| 1040.3667                  | 23.51956183 | 1032.9068                  | 589.0998403 | 1029.6523                    | 10.10936962 | 1053.8508                    | 55.15195282 | 1063.1234                    | 1399.043855 | 1065.1343                    | 70.12850869 |
| 1044.4976                  | 369.5981795 | 1058.8403                  | 82.70186799 | 1071.2901                    | 35.49602207 | 1071.5803                    | 8.082438382 | 1075.878                     | 219.8462847 | 1080.5504                    | 18.31455962 |
| 1048.3129                  | 1499.78718  | 1080.3143                  | 17.98436275 | 1134.3576                    | 183.6974452 | 1106.1554                    | 324.0197884 | 1091.1699                    | 144.5150811 | 1088.0911                    | 331.5113326 |
| 1123.6601                  | 454.8589325 | 1107.5413                  | 53.55066506 | 1146.5817                    | 98.69897456 | 1123.1869                    | 17.60263991 | 1138.2066                    | 92.89718175 | 1134.9295                    | 87.0308588  |
| 1161.5627                  | 43.44894135 | 1131.0505                  | 312.9738278 | 1167.7385                    | 201.3111942 | 1184.8161                    | 319.279782  | 1186.6503                    | 271.3966208 | 1183.4818                    | 196.5992461 |
| 1186.0415                  | 330.7676627 | 1182.6046                  | 292.7165942 | 1226.9928                    | 26.46413342 | 1200.5315                    | 67.04936033 | 1197.0174                    | 4.882191558 | 1190.2346                    | 150.1782455 |
| 1216.2732                  | 38.36177282 | 1224.0316                  | 138.1426816 | 1242.0447                    | 24.0884122  | 1255.8441                    | 67.60707888 | 1244.1746                    | 32.08481121 | 1250.9527                    | 42.84411253 |
| 1228.9427                  | 35.82639404 | 1290.1619                  | 8.537166746 | 1288.5707                    | 45.06208242 | 1292.327                     | 29.96693191 | 1250.3886                    | 15.59561036 | 1290.4865                    | 55.38194735 |
| 1279.2522                  | 133.0568163 | 1314.9783                  | 17.58245943 | 1342.346                     | 370.7584347 | 1356.3979                    | 7.477337586 | 1346.2648                    | 8.184656991 | 1340.7032                    | 7.710674123 |
| 1333.4939                  | 20.95078947 | 1351.2812                  | 112.7589501 | 1349.1199                    | 79.45085161 | 1375.8541                    | 382.5994241 | 1374.6814                    | 649.1148195 | 1372.1177                    | 22.76698005 |
| 1372.9036                  | 526.0199474 | 1371.8026                  | 522.4265645 | 1378.999                     | 9.305514843 | 1381.0374                    | 146.4176076 | 1386.4598                    | 193.3211856 | 1376.8304                    | 486.7273189 |
| 1383.8015                  | 6.930265937 | 1386.5313                  | 31.65320439 | 1401.9635                    | 52.00864088 | 1395.1047                    | 48.36388133 | 1395.2519                    | 76.79961956 | 1395.4877                    | 14.77047739 |
| 1407.1782                  | 51.40029212 | 1416.5347                  | 7.679789107 | 1417.6878                    | 88.01541287 | 1414.0654                    | 23.3131971  | 1422.1078                    | 64.73667173 | 1417.2753                    | 17.72671057 |
| 1432.9634                  | 62.52656212 | 1431.8531                  | 110.0654485 | 1435.3883                    | 8.433833825 | 1421.5007                    | 72.55535782 | 1430.2371                    | 62.63710256 | 1424.161                     | 135.572635  |
| 1456.1194                  | 31.89612368 | 1460.9832                  | 9.784102793 | 1481.6341                    | 5.891064846 | 1478.2262                    | 25.15013823 | 1482.7971                    | 20.2914041  | 1482.5324                    | 19.52434344 |
| 1483.4196                  | 10.19146597 | 1484.2839                  | 26.25161083 | 1484.8806                    | 19.93193352 | 1489.5819                    | 12.13492162 | 1496.8389                    | 19.99231029 | 1487.9109                    | 36.74299514 |
| 1491.4049                  | 5.904363645 | 1499.4381                  | 44.56310254 | 1489.4928                    | 22.51563029 | 1495.7046                    | 34.47055998 | 1498.434                     | 24.65707939 | 1497.2082                    | 15.71103061 |
| 1500.9655                  | 25.84184251 | 1506.3895                  | 9.679599785 | 1505.0484                    | 41.87009618 | 1521.3726                    | 20.53892258 | 1515.347                     | 13.20569894 | 1523.9953                    | 17.83637852 |
| 1737.7923                  | 19.35043077 | 1755.4256                  | 23.77422548 | 1754.6319                    | 71.25080634 | 1757.098                     | 55.42319381 | 1772.6848                    | 7.510762696 | 1769.3608                    | 6.925796016 |
| 3051.2187                  | 28.34975607 | 3026.8721                  | 25.55312389 | 3020.3196                    | 33.37187262 | 3058.7516                    | 14.38569101 | 3039.0019                    | 12.55773299 | 3052.2005                    | 15.51540988 |
| 3074.6549                  | 3.564910437 | 3058.3763                  | 10.95657927 | 3062.8387                    | 17.47078167 | 3068.6596                    | 15.0690885  | 3059.5337                    | 4.553691474 | 3061.3721                    | 26.61312241 |
| 3119.3937                  | 15.85876272 | 3098.5003                  | 16.63341004 | 3080.643                     | 18.18798461 | 3087.0451                    | 25.26684822 | 3072.259                     | 36.98763391 | 3093.0768                    | 25.64591312 |
| 3149.3877                  | 5.928890403 | 3115.1358                  | 6.753505631 | 3107.4426                    | 26.04575787 | 3112.7356                    | 45.12259702 | 3107.4993                    | 14.0078911  | 3105.4334                    | 11.39973397 |
| 3166.2852                  | 4.039940499 | 3118.5165                  | 11.47727631 | 3116.8003                    | 4.016148294 | 3119.3929                    | 7.775467555 | 3116.2307                    | 5.274294464 | 3111.9834                    | 25.23589341 |
| 3174.3827                  | 3.877442939 | 3157.568                   | 13.41558388 | 3159.0094                    | 6.106449752 | 3150.349                     | 4.75483489  | 3129.7168                    | 12.19540396 | 3145.5873                    | 11.711039   |
| 3185.4054                  | 5.148610815 | 3165.3726                  | 3.239538709 | 3174.7584                    | 16.00994753 | 3155.7485                    | 9.30769236  | 3163.1523                    | 10.47989334 | 3155.1161                    | 7.418235919 |
| 3268.7322                  | 3.403043161 | 3250.6187                  | 6.713552892 | 3210.7067                    | 0.65431597  | 3177.8862                    | 17.51430769 | 3175.5254                    | 15.04966301 | 3165.2241                    | 19.7547526  |
| 3878.0752                  | 60.55341358 | 3877.3823                  | 62.27918744 | 3818.43                      | 75.74791031 | 3847.2969                    | 68.17485697 | 3874.1376                    | 40.46242127 | 3851.3782                    | 52.19102698 |

Table S38: Vibrational frequencies of transition state of ISOPOO-SO<sub>2</sub>s calculated by G16 at the M06-2X/aug-cc-pV(T+d)Z level of theory.

| 1,2-ISOPOO-SO <sub>2</sub> |             | 4,3-ISOPOO-SO <sub>2</sub> |             | <i>E</i> -1,4-ISOPOO-SO <sub>2</sub> |             | <i>Z</i> -1,4-ISOPOO-SO <sub>2</sub> |             | <i>E</i> -4,1-ISOPOO-SO <sub>2</sub> |             | <i>Z</i> -4,1-ISOPOO-SO <sub>2</sub> |             |
|----------------------------|-------------|----------------------------|-------------|--------------------------------------|-------------|--------------------------------------|-------------|--------------------------------------|-------------|--------------------------------------|-------------|
| Freq.                      | Intensity   | Freq.                      | Intensity   | Freq.                                | Intensity   | Freq.                                | Intensity   | Freq.                                | Intensity   | Freq.                                | Intensity   |
| -482.7462                  | 279.9917    | -501.86                    | 277.7081    | -561.34                              | 159.6331    | -470.04                              | 183.4368    | -449.33                              | 201.5693    | -457.36                              | 1741.9175   |
| 29.5059                    | 88.29001994 | 33.5408                    | 119.5958081 | 42.1653                              | 40.46610047 | 18.5062                              | 438.3633379 | 27.0198                              | 273.3244679 | 27.9231                              | 302.614775  |
| 40.4358                    | 117.1291922 | 40.9454                    | 184.5072181 | 63.3336                              | 269.3272835 | 35.37                                | 90.25489952 | 34.0985                              | 174.9094273 | 35.192                               | 18.20576329 |
| 70.0032                    | 9.72228692  | 57.6641                    | 3.908861022 | 84.7078                              | 86.69429174 | 55.6168                              | 23.29075629 | 48.6389                              | 155.5358834 | 49.1006                              | 20.58861399 |
| 79.141                     | 11.07479824 | 78.054                     | 53.63049539 | 94.6095                              | 55.43271887 | 98.0927                              | 36.80198122 | 62.9856                              | 111.658993  | 90.9989                              | 62.70005632 |
| 152.0613                   | 95.07991252 | 164.5988                   | 62.04212578 | 118.3607                             | 28.68668505 | 115.4624                             | 99.43917418 | 82.0596                              | 13.48117585 | 109.8636                             | 42.11134679 |
| 174.147                    | 15.66234847 | 185.2948                   | 8.16848272  | 157.906                              | 75.17164016 | 130.796                              | 12.79818303 | 126.1416                             | 16.55006482 | 147.017                              | 13.05494662 |
| 207.8288                   | 35.15673155 | 197.2695                   | 20.04309718 | 166.6581                             | 42.70231098 | 178.42                               | 11.86623247 | 158.5711                             | 95.1390587  | 149.9858                             | 13.28595106 |
| 234.2641                   | 9.752787083 | 206.1348                   | 8.265812603 | 208.3352                             | 16.2287232  | 219.8946                             | 110.8930944 | 211.6596                             | 73.25155126 | 205.6219                             | 2.337894875 |
| 247.0593                   | 54.15397051 | 222.6731                   | 20.36146324 | 257.9735                             | 41.17078958 | 244.2909                             | 57.0082118  | 230.5438                             | 61.15510083 | 234.4461                             | 103.6971301 |
| 276.4576                   | 9.778047973 | 276.6298                   | 76.40762232 | 290.8591                             | 54.43844894 | 277.0893                             | 63.50887909 | 257.9519                             | 142.3413311 | 286.1675                             | 113.6703102 |
| 317.8387                   | 101.4348351 | 308.6804                   | 78.09479547 | 331.6651                             | 44.13096254 | 321.1659                             | 18.2237433  | 287.6237                             | 406.8988747 | 318.2918                             | 87.31026768 |
| 351.1438                   | 214.2031228 | 353.4332                   | 43.61737781 | 380.5795                             | 9.926859785 | 364.2108                             | 456.559958  | 327.5085                             | 1039.825584 | 376.0758                             | 49.12652789 |
| 372.5569                   | 60.12950826 | 391.617                    | 546.6693916 | 406.7373                             | 22.99553592 | 378.5343                             | 47.37731046 | 364.1561                             | 56.12998518 | 398.8726                             | 598.1376636 |
| 403.5305                   | 892.8852099 | 423.0874                   | 11.87142732 | 437.3731                             | 39.04997388 | 411.5116                             | 74.20651657 | 408.0967                             | 29.15382519 | 414.4557                             | 178.3773702 |
| 431.5338                   | 378.0506167 | 433.9038                   | 122.1458382 | 443.3944                             | 738.9124898 | 433.5337                             | 408.5662768 | 415.3505                             | 35.92998631 | 460.5354                             | 180.8049965 |
| 483.172                    | 160.9565781 | 529.7835                   | 396.1140166 | 477.4863                             | 130.625391  | 501.7923                             | 28.13689314 | 471.8217                             | 84.96230841 | 490.2474                             | 9.153081058 |
| 508.9805                   | 53.27264459 | 536.2824                   | 189.5386744 | 521.6301                             | 353.3403311 | 527.2544                             | 547.8348384 | 528.9786                             | 339.9662173 | 515.3527                             | 24.99059695 |
| 534.4994                   | 487.0749944 | 551.6331                   | 103.1409968 | 579.3645                             | 83.87474862 | 578.4305                             | 54.1209364  | 533.7786                             | 222.1835154 | 528.8211                             | 529.9206581 |
| 607.4804                   | 44.86131814 | 562.0032                   | 22.49737575 | 606.8176                             | 7.764241387 | 657.814                              | 37.80931863 | 620.4543                             | 41.10249998 | 674.5726                             | 32.85029026 |
| 686.9365                   | 113.9191489 | 743.7886                   | 0.151254008 | 811.486                              | 8.051200039 | 792.2119                             | 15.97245719 | 836.488                              | 14.44549805 | 798.7582                             | 46.46632569 |
| 783.2913                   | 26.55604238 | 860.8092                   | 73.1106727  | 868.2538                             | 24.07687855 | 886.2074                             | 32.67884303 | 896.2895                             | 45.35316527 | 910.9737                             | 2.330646092 |
| 875.6936                   | 24.85088832 | 884.1157                   | 11.14719185 | 913.5934                             | 118.3937337 | 931.2369                             | 115.4660302 | 957.9375                             | 100.9212646 | 938.1737                             | 70.68388104 |
| 938.4006                   | 17.3409437  | 979.5385                   | 157.9226112 | 973.1025                             | 42.32661459 | 955.2329                             | 102.9740265 | 989.3725                             | 124.0824172 | 966.9184                             | 99.82256876 |
| 976.5029                   | 73.51336552 | 993.1673                   | 5.606308167 | 985.3057                             | 806.4451553 | 1000.2859                            | 100.7365956 | 1022.507                             | 95.56306819 | 1000.6039                            | 68.3916244  |
| 999.8167                   | 129.0782722 | 1030.7309                  | 499.4462012 | 1003.0001                            | 381.8226809 | 1047.1314                            | 1362.008235 | 1053.6514                            | 250.3796471 | 1048.8638                            | 1256.367699 |
| 1040.3859                  | 24.596249   | 1032.4861                  | 1473.131384 | 1029.4707                            | 11.03616144 | 1053.9163                            | 66.10661218 | 1068.7809                            | 1290.627615 | 1064.9481                            | 97.35690404 |
| 1045.543                   | 3.498162708 | 1058.6574                  | 86.2075374  | 1071.4499                            | 36.61853485 | 1071.4399                            | 8.386582107 | 1076.7022                            | 559.1428962 | 1080.7544                            | 29.49613508 |
| 1053.8867                  | 1848.165135 | 1080.0928                  | 12.85953019 | 1134.5058                            | 187.4831369 | 1105.8907                            | 343.0896183 | 1091.5046                            | 110.9135521 | 1088.6929                            | 341.780027  |
| 1124.2395                  | 468.6777542 | 1107.3416                  | 53.05486649 | 1146.6637                            | 102.4295508 | 1123.3179                            | 18.81944171 | 1138.0499                            | 91.44608953 | 1134.6955                            | 92.13269788 |
| 1161.6882                  | 31.67305322 | 1131.1226                  | 322.7926198 | 1188.3539                            | 209.5377652 | 1196.8114                            | 110.5103886 | 1197.0241                            | 5.543717648 | 1186.368                             | 29.23697846 |
| 1206.5989                  | 379.7664454 | 1205.538                   | 310.9288951 | 1226.7799                            | 25.9728074  | 1209.2663                            | 288.3547385 | 1208.5697                            | 292.1803464 | 1210.7129                            | 333.3630422 |
| 1216.5327                  | 34.37184209 | 1224.3568                  | 145.0401093 | 1241.749                             | 23.97752652 | 1255.5051                            | 70.26966887 | 1243.922                             | 30.83927    | 1251.303                             | 48.48701906 |
| 1228.7107                  | 17.71462737 | 1289.8928                  | 8.800599778 | 1288.0709                            | 46.23636713 | 1292.1174                            | 29.19775965 | 1250.4681                            | 15.67852435 | 1289.9934                            | 53.67220459 |
| 1279.3888                  | 130.5876466 | 1315.1404                  | 19.59206862 | 1348.4133                            | 11.70949368 | 1356.5118                            | 6.934991644 | 1346.2532                            | 7.811643809 | 1341.3912                            | 7.836091558 |
| 1333.2323                  | 20.75591406 | 1351.0332                  | 94.53487874 | 1376.4791                            | 453.4351558 | 1380.2821                            | 43.77989048 | 1386.2144                            | 260.6060735 | 1374.3507                            | 24.72069541 |
| 1383.6439                  | 12.00269984 | 1387.0188                  | 22.47866969 | 1379.0097                            | 17.38109492 | 1394.0543                            | 13.09696195 | 1395.1334                            | 84.85623429 | 1394.879                             | 14.01644068 |
| 1405.4656                  | 259.3608903 | 1408.5882                  | 562.9543997 | 1401.8287                            | 63.29545421 | 1410.1432                            | 492.5896223 | 1409.7775                            | 586.2119411 | 1412.8465                            | 368.1687693 |
| 1409.1473                  | 318.2572182 | 1416.5872                  | 6.858581256 | 1417.84                              | 74.52320614 | 1414.0991                            | 11.42964069 | 1422.0893                            | 64.42247789 | 1417.4813                            | 53.40009026 |
| 1433.097                   | 73.71172469 | 1431.619                   | 112.5727462 | 1435.3562                            | 8.513790585 | 1422.0556                            | 128.5876705 | 1430.2315                            | 65.48107671 | 1424.4031                            | 233.4831476 |
| 1456.1814                  | 30.58741448 | 1460.9601                  | 9.898945562 | 1481.9177                            | 5.359872694 | 1478.3154                            | 25.5615081  | 1482.7067                            | 19.9401703  | 1482.6311                            | 19.88764103 |
| 1483.6615                  | 9.050791999 | 1484.3199                  | 26.57591632 | 1484.6354                            | 20.33829384 | 1489.5587                            | 12.93911861 | 1496.7033                            | 19.85978257 | 1487.9649                            | 37.78943944 |
| 1491.1039                  | 5.878800865 | 1499.4688                  | 43.08000307 | 1489.9078                            | 21.42546078 | 1495.6315                            | 34.08974439 | 1497.9599                            | 24.73386069 | 1497.238                             | 15.22631099 |
| 1500.6693                  | 26.31695039 | 1505.6615                  | 9.786024509 | 1505.274                             | 42.07531331 | 1521.9589                            | 20.46049946 | 1515.2785                            | 12.3988218  | 1523.664                             | 17.90911788 |
| 1737.6142                  | 19.13958372 | 1755.496                   | 23.89916961 | 1756.1708                            | 67.35065276 | 1757.0821                            | 55.17825783 | 1772.7708                            | 7.5378529   | 1769.4972                            | 6.686281197 |
| 3050.9534                  | 28.33299968 | 3028.1765                  | 25.38863668 | 3019.8274                            | 33.48194047 | 3058.7451                            | 14.34333315 | 3040.5448                            | 11.77278033 | 3052.0917                            | 15.65556154 |
| 3074.9189                  | 3.650362457 | 3058.4376                  | 10.92688044 | 3062.9319                            | 17.11480417 | 3069.3433                            | 16.10384697 | 3059.5198                            | 4.564665168 | 3062.2722                            | 26.73270962 |
| 3119.4711                  | 15.73572562 | 3099.1912                  | 15.88593572 | 3080.8978                            | 18.30625694 | 3087.9148                            | 23.94427967 | 3072.2628                            | 36.91396203 | 3093.548                             | 24.74355197 |
| 3149.6309                  | 5.917286312 | 3115.0946                  | 6.761407018 | 3107.906                             | 25.93828551 | 3113.2468                            | 44.63811268 | 3107.5093                            | 14.01131227 | 3105.2706                            | 11.50092505 |
| 3166.8794                  | 4.049008342 | 3118.6408                  | 11.38561117 | 3116.6772                            | 4.348471132 | 3119.3293                            | 7.823457994 | 3115.9623                            | 5.254391849 | 3112.0459                            | 25.43164871 |
| 3174.4849                  | 3.767104904 | 3157.5686                  | 13.51514038 | 3159.4052                            | 6.054166383 | 3150.9416                            | 4.719756028 | 3130.2362                            | 11.5822712  | 3146.3676                            | 11.3604662  |
| 3185.4236                  | 5.107252479 | 3165.3513                  | 3.22292411  | 3174.7044                            | 15.78892905 | 3155.6829                            | 9.280199985 | 3163.1283                            | 10.49308953 | 3155.0641                            | 7.315179667 |
| 3268.6073                  | 3.446745727 | 3250.5982                  | 6.731268077 | 3210.4417                            | 0.622434338 | 3178.0123                            | 17.54687851 | 3175.5424                            | 15.15875392 | 3165.0541                            | 19.9005135  |
| 3878.683                   | 60.36485513 | 3876.1148                  | 61.93047253 | 3820.7717                            | 75.72800643 | 3848.7856                            | 67.21664299 | 3874.2316                            | 40.4799746  | 3851.9519                            | 52.39691498 |

Table S39: Vibrational frequencies of ISOPOOSO<sub>2</sub>s calculated by G16 at the M06-2X/aug-cc-pVTZ level of theory.

| 1,2-ISOPOOSO <sub>2</sub> |             | 4,3-ISOPOOSO <sub>2</sub> |             | <i>E</i> -1,4-ISOPOOSO <sub>2</sub> |             | <i>Z</i> -1,4-ISOPOOSO <sub>2</sub> |             | <i>E</i> -4,1-ISOPOOSO <sub>2</sub> |             | <i>Z</i> -4,1-ISOPOOSO <sub>2</sub> |              |
|---------------------------|-------------|---------------------------|-------------|-------------------------------------|-------------|-------------------------------------|-------------|-------------------------------------|-------------|-------------------------------------|--------------|
| Freq.                     | Intensity   | Freq.                     | Intensity   | Freq.                               | Intensity   | Freq.                               | Intensity   | Freq.                               | Intensity   | Freq.                               | Intensity    |
| 34.47                     | 52.52070026 | 39.82                     | 96.73938034 | 42.761                              | 106.8323696 | 32.8965                             | 261.4606656 | 23.4191                             | 185.1001623 | 31.9984                             | 40.08298111  |
| 50.2308                   | 43.33228256 | 44.7665                   | 46.22430677 | 71.771                              | 79.15872471 | 44.4195                             | 150.0755985 | 31.6829                             | 224.0053141 | 46.6237                             | 223.480936   |
| 66.9213                   | 12.81089131 | 54.3541                   | 6.319433415 | 77.0617                             | 107.9536318 | 61.0311                             | 40.6776545  | 43.4424                             | 112.5767054 | 51.3308                             | 17.48685807  |
| 81.4112                   | 30.76901734 | 69.8678                   | 102.6415711 | 85.7712                             | 109.210377  | 98.4302                             | 21.08787206 | 61.5878                             | 101.7303526 | 84.3935                             | 53.41666191  |
| 145.3297                  | 81.89083381 | 165.8039                  | 64.09593334 | 131.2991                            | 23.33494441 | 123.1617                            | 76.90076019 | 83.008                              | 15.42258125 | 128.2889                            | 14.76484624  |
| 186.8417                  | 10.87871697 | 182.4503                  | 10.35557961 | 149.3914                            | 83.80620201 | 145.6729                            | 9.609745849 | 118.1709                            | 14.43896311 | 148.7449                            | 16.25316109  |
| 220.6428                  | 20.49819812 | 198.7059                  | 17.48095206 | 156.5154                            | 50.36341672 | 178.4251                            | 9.826757308 | 161.9478                            | 106.0536399 | 161.704                             | 53.47683295  |
| 254.9195                  | 16.80301422 | 213.0623                  | 6.442958908 | 249.1575                            | 11.50749991 | 247.1165                            | 15.80638683 | 222.8187                            | 19.05368225 | 201.366                             | 6.904368128  |
| 273.9093                  | 32.45590112 | 244.5822                  | 18.04167458 | 267.7836                            | 64.05624535 | 261.4315                            | 58.23452163 | 260.7285                            | 18.23415881 | 285.7344                            | 266.0036668  |
| 288.1815                  | 71.79991961 | 287.1896                  | 46.10476826 | 317.802                             | 33.03471402 | 289.0941                            | 67.2429345  | 271.8297                            | 252.616618  | 295.8577                            | 19.37136772  |
| 319.4138                  | 132.5486839 | 329.3516                  | 227.9317532 | 369.074                             | 4.671739419 | 323.4794                            | 863.7996206 | 304.1196                            | 440.3533385 | 353.8797                            | 368.7027918  |
| 367.6428                  | 507.7121685 | 357.1429                  | 79.34383867 | 374.809                             | 30.72975628 | 362.3658                            | 93.12004607 | 335.9749                            | 915.2871915 | 363.2962                            | 480.3447226  |
| 394.9158                  | 395.4174113 | 388.9829                  | 532.1556768 | 437.358                             | 13.96423176 | 402.9056                            | 63.8373924  | 375.2913                            | 51.45304518 | 398.5001                            | 14.30576524  |
| 413.3338                  | 642.3012638 | 439.6175                  | 9.413187415 | 440.962                             | 858.4991181 | 431.8607                            | 63.93501033 | 432.2884                            | 43.44065541 | 455.3766                            | 274.7560499  |
| 445.5392                  | 66.16892268 | 462.5716                  | 234.3341346 | 452.7924                            | 150.636641  | 448.5607                            | 196.8049839 | 452.9967                            | 98.7043991  | 461.2359                            | 64.12811789  |
| 488.5338                  | 144.7295701 | 514.8405                  | 229.1661871 | 481.2826                            | 136.7874815 | 497.6146                            | 69.00589159 | 478.9375                            | 70.23005353 | 486.2423                            | 112.7165165  |
| 503.5653                  | 101.3405284 | 536.498                   | 60.795966   | 510.2602                            | 280.2482943 | 523.8555                            | 179.8991053 | 517.0783                            | 201.1663414 | 508.1408                            | 14.28012654  |
| 528.5903                  | 122.595843  | 555.5947                  | 52.20085815 | 578.9971                            | 90.17736917 | 569.2756                            | 71.21866616 | 534.3493                            | 84.88651421 | 532.5162                            | 162.696536   |
| 614.7529                  | 56.47947712 | 571.9162                  | 20.76255463 | 609.5457                            | 20.87551751 | 646.1011                            | 90.23024728 | 621.8758                            | 35.87774732 | 664.162                             | 103.6095329  |
| 684.5014                  | 141.861399  | 701.0008                  | 827.6817802 | 692.9255                            | 522.0206998 | 712.2083                            | 468.3398255 | 681.1552                            | 602.280493  | 706.9376                            | 455.3161984  |
| 701.4985                  | 704.1139381 | 741.4851                  | 4.327359141 | 813.9355                            | 16.22401814 | 790.4261                            | 12.66177983 | 834.7279                            | 25.00518693 | 797.588                             | 36.9229886   |
| 789.7329                  | 5.050062593 | 867.3217                  | 60.78101708 | 876.1418                            | 22.40121219 | 886.8938                            | 17.0057743  | 897.1776                            | 39.42540816 | 905.5678                            | 3.124316736  |
| 879.7499                  | 26.36879745 | 888.3984                  | 18.38161719 | 922.963                             | 246.7154352 | 921.7599                            | 131.9986207 | 967.782                             | 112.4014454 | 928.2712                            | 91.46975411  |
| 943.4203                  | 24.68180377 | 973.6978                  | 42.76658421 | 973.2724                            | 23.55995952 | 954.8877                            | 92.09614734 | 979.1152                            | 117.8876947 | 969.5438                            | 78.4705146   |
| 978.0805                  | 54.48627814 | 978.117                   | 125.3002222 | 996.3472                            | 69.91905553 | 994.7828                            | 33.1966272  | 1003.2033                           | 21.09418747 | 995.9297                            | 42.70478693  |
| 996.897                   | 148.6862368 | 993.2991                  | 2.862424343 | 1003.3296                           | 89.59437913 | 1023.8786                           | 173.0173796 | 1047.9202                           | 234.2339103 | 1029.6587                           | 156.082474   |
| 1002.9067                 | 29.83813829 | 1045.0291                 | 177.899646  | 1036.0303                           | 30.93425354 | 1056.33                             | 84.02649145 | 1061.737                            | 16.44700173 | 1065.9371                           | 17.6385933   |
| 1038.3561                 | 29.58134142 | 1067.3373                 | 129.4978251 | 1071.8772                           | 49.45930757 | 1073.0599                           | 6.718394783 | 1082.7071                           | 123.6926162 | 1080.4856                           | 12.82937887  |
| 1051.1009                 | 63.69252896 | 1087.2875                 | 157.4078079 | 1129.702                            | 318.6105737 | 1106.6176                           | 181.5485819 | 1091.5891                           | 296.4313399 | 1091.2394                           | 302.3036597  |
| 1118.9085                 | 418.4638925 | 1110.2464                 | 60.30594238 | 1131.4038                           | 42.32082689 | 1121.4492                           | 9.892659621 | 1139.7383                           | 313.363513  | 1134.1494                           | 35.03242555  |
| 1140.3283                 | 400.8120125 | 1134.328                  | 221.8290057 | 1143.8071                           | 153.6926908 | 1135.0429                           | 366.8338962 | 1142.1431                           | 60.00950583 | 1139.3884                           | 348.9459259  |
| 1167.3086                 | 45.61543102 | 1141.0389                 | 312.3539224 | 1227.2804                           | 31.5620236  | 1201.7624                           | 68.23815828 | 1196.868                            | 5.147790181 | 1187.0471                           | 27.85981078  |
| 1217.8729                 | 39.39007489 | 1225.2115                 | 130.2285725 | 1239.8461                           | 17.34412745 | 1261.3906                           | 21.61545876 | 1249.5713                           | 7.282349922 | 1253.5542                           | 13.25116447  |
| 1232.8117                 | 42.49891118 | 1296.1274                 | 3.281387743 | 1290.413                            | 29.33649131 | 1298.0265                           | 9.675781566 | 1250.1167                           | 40.41552461 | 1300.2077                           | 16.19129779  |
| 1278.8637                 | 110.2881794 | 1314.5904                 | 6.145586234 | 1321.0644                           | 369.7006639 | 1330.0178                           | 399.5666965 | 1337.5713                           | 447.8782228 | 1335.699                            | 374.6108785  |
| 1333.7034                 | 11.08605154 | 1338.3257                 | 428.5179762 | 1346.7639                           | 14.85222436 | 1351.5975                           | 28.71184888 | 1346.4938                           | 5.422227844 | 1340.5554                           | 20.34463951  |
| 1337.3069                 | 384.6743092 | 1356.5997                 | 27.45027143 | 1378.3293                           | 10.46517996 | 1386.4892                           | 57.42503901 | 1386.7922                           | 153.8202113 | 1380.0242                           | 46.857525249 |
| 1382.8828                 | 9.753936873 | 1390.3622                 | 42.49208226 | 1399.694                            | 64.43886304 | 1401.6382                           | 64.82309464 | 1399.7752                           | 55.33270811 | 1398.9044                           | 45.86038717  |
| 1410.1006                 | 58.35138378 | 1416.3715                 | 9.827510969 | 1418.5011                           | 81.38055012 | 1413.8766                           | 31.11437233 | 1420.9487                           | 64.17462347 | 1416.2369                           | 27.10561802  |
| 1430.9637                 | 48.65348268 | 1435.2343                 | 99.94602573 | 1436.1081                           | 7.939303285 | 1415.7986                           | 38.87369823 | 1430.2317                           | 66.29611166 | 1420.0555                           | 103.3677081  |
| 1456.0276                 | 27.56166519 | 1461.25                   | 5.358419345 | 1481.0382                           | 7.036350498 | 1477.0731                           | 22.32142389 | 1483.4719                           | 20.46907547 | 1482.5354                           | 15.58666763  |
| 1485.5893                 | 9.584988344 | 1485.3064                 | 27.24075472 | 1485.1165                           | 21.41614529 | 1490.0628                           | 9.146312077 | 1495.25                             | 18.70541127 | 1489.2495                           | 32.93715101  |
| 1493.5941                 | 6.213826167 | 1500.3596                 | 39.22605363 | 1491.614                            | 14.56266157 | 1496.541                            | 33.27516786 | 1512.1636                           | 38.7262095  | 1498.0391                           | 17.1987008   |
| 1503.2493                 | 29.19420214 | 1506.3323                 | 6.947329781 | 1503.353                            | 42.75242383 | 1513.9301                           | 21.04886383 | 1515.4057                           | 1.637715973 | 1518.6251                           | 16.73858961  |
| 1735.4011                 | 18.93410849 | 1751.6576                 | 21.12789723 | 1760.5381                           | 51.43820627 | 1759.356                            | 55.99785568 | 1771.1523                           | 6.728685523 | 1771.7433                           | 8.863734858  |
| 3053.5216                 | 29.18386537 | 3011.738                  | 40.50531089 | 3011.6906                           | 36.06775146 | 3057.8063                           | 18.03705419 | 3031.5045                           | 24.62223729 | 3052.6213                           | 16.96364204  |
| 3071.353                  | 4.759969204 | 3058.5881                 | 12.5154037  | 3060.0776                           | 15.90438541 | 3060.1851                           | 12.83726074 | 3059.0507                           | 6.117018095 | 3052.7795                           | 25.89950176  |
| 3118.7071                 | 15.52199141 | 3092.6738                 | 20.42469579 | 3081.9473                           | 17.54070429 | 3081.9671                           | 27.5334786  | 3072.3726                           | 39.0392843  | 3086.6408                           | 31.48307159  |
| 3146.1976                 | 12.25426347 | 3115.4556                 | 8.27253131  | 3098.272                            | 20.4520431  | 3103.953                            | 55.43289925 | 3107.5964                           | 14.53315174 | 3105.9646                           | 27.16070758  |
| 3157.3277                 | 7.069863305 | 3117.2133                 | 15.33221313 | 3111.9968                           | 6.882743137 | 3119.9973                           | 8.368535471 | 3117.0652                           | 5.96950854  | 3106.5804                           | 8.652010427  |
| 3173.9267                 | 3.710702894 | 3157.1195                 | 12.79743167 | 3148.4092                           | 8.719146933 | 3136.281                            | 5.290947612 | 3124.3837                           | 21.45263547 | 3133.3941                           | 15.54383378  |
| 3185.4965                 | 4.529671102 | 3166.9099                 | 3.205213616 | 3172.6683                           | 16.68089504 | 3156.1165                           | 9.350342218 | 3164.306                            | 10.39841022 | 3154.2771                           | 6.534119582  |
| 3269.3124                 | 2.572299212 | 3252.2794                 | 6.500981532 | 3204.3487                           | 0.172182778 | 3175.1081                           | 15.89786701 | 3174.3421                           | 14.20783743 | 3163.1862                           | 19.58548914  |
| 3882.3757                 | 66.82703764 | 3876.1727                 | 66.24718815 | 3827.6643                           | 62.80756473 | 3846.2177                           | 94.71015267 | 3873.5424                           | 40.28685964 | 3844.8386                           | 60.07101823  |

Table S40: Vibrational frequencies of ISOPOOSO<sub>2</sub>s calculated by G16 at the M06-2X/aug-cc-pV(T+d)Z level of theory.

| 1,2-ISOPOOSO <sub>2</sub> |             | 4,3-ISOPOOSO <sub>2</sub> |             | E-1,4-ISOPOOSO <sub>2</sub> |             | Z-1,4-ISOPOOSO <sub>2</sub> |             | E-4,1-ISOPOOSO <sub>2</sub> |             | Z-4,1-ISOPOOSO <sub>2</sub> |             |
|---------------------------|-------------|---------------------------|-------------|-----------------------------|-------------|-----------------------------|-------------|-----------------------------|-------------|-----------------------------|-------------|
| Freq.                     | Intensity   | Freq.                     | Intensity   | Freq.                       | Intensity   | Freq.                       | Intensity   | Freq.                       | Intensity   | Freq.                       | Intensity   |
| 34.3755                   | 48.11578479 | 37.8418                   | 89.00866822 | 32.4872                     | 120.9202275 | 33.168                      | 140.6175981 | 21.673                      | 217.9967395 | 34.3942                     | 39.28595222 |
| 50.6369                   | 39.75460437 | 45.5175                   | 37.34568529 | 70.8057                     | 92.85870838 | 49.2905                     | 159.3476551 | 32.3626                     | 201.4878299 | 50.9206                     | 44.11632372 |
| 67.5244                   | 11.67437142 | 54.5304                   | 5.391828926 | 77.5303                     | 121.7499891 | 59.635                      | 66.97049942 | 44.9453                     | 107.7205554 | 53.2729                     | 147.2858958 |
| 79.8446                   | 31.33774916 | 68.8404                   | 104.1328665 | 93.3935                     | 92.03590859 | 95.8373                     | 25.45477082 | 61.6095                     | 99.17563121 | 85.1141                     | 57.46405363 |
| 145.1837                  | 80.76139322 | 165.3632                  | 65.08459133 | 146.9562                    | 62.23957485 | 122.3066                    | 76.67514638 | 83.3922                     | 16.55228545 | 129.2105                    | 14.21184518 |
| 187.8848                  | 10.1664609  | 182.8604                  | 10.0160141  | 150.0181                    | 28.20163659 | 143.7627                    | 8.208413932 | 117.9569                    | 14.75263545 | 149.0254                    | 15.48639623 |
| 222.8118                  | 19.9208639  | 199.5677                  | 17.79927033 | 158.6511                    | 47.27648307 | 178.7628                    | 8.36430255  | 162.3269                    | 107.5164728 | 163.913                     | 53.21614152 |
| 253.7648                  | 16.33710339 | 213.4836                  | 6.245241366 | 250.9484                    | 12.85295222 | 249.5169                    | 12.96186538 | 223.3845                    | 18.45894029 | 201.5803                    | 7.069206414 |
| 274.9149                  | 21.64664082 | 246.3101                  | 12.09403526 | 267.6382                    | 69.50338994 | 261.9366                    | 62.16437264 | 261.9054                    | 21.3844961  | 288.3198                    | 260.1951763 |
| 288.4129                  | 81.01821529 | 289.1866                  | 44.55723276 | 318.2762                    | 33.43798698 | 289.9868                    | 68.98394789 | 274.6115                    | 270.3335492 | 298.0121                    | 15.63699963 |
| 319.6849                  | 142.1450621 | 330.3376                  | 323.6828834 | 372.2432                    | 3.980360669 | 333.3122                    | 835.9151298 | 306.9172                    | 461.2987544 | 355.5868                    | 527.5545634 |
| 368.4241                  | 622.6160552 | 356.3528                  | 93.48449893 | 381.8803                    | 42.78350597 | 366.542                     | 78.4226746  | 336.8069                    | 869.6435724 | 368.1712                    | 330.3711321 |
| 398.7427                  | 358.5460888 | 383.4057                  | 463.7496271 | 432.999                     | 849.3842847 | 404.333                     | 94.49452985 | 375.901                     | 48.13902503 | 400.6045                    | 25.86904944 |
| 413.8897                  | 556.9352781 | 443.2525                  | 9.111885265 | 438.9042                    | 206.5940891 | 437.5236                    | 57.86365781 | 439.4921                    | 51.08699006 | 462.0616                    | 261.0263537 |
| 449.856                   | 67.74923607 | 469.9994                  | 233.6567573 | 453.8513                    | 19.87704856 | 456.5892                    | 195.853814  | 455.6494                    | 89.71055933 | 463.7519                    | 45.21011776 |
| 492.2433                  | 112.7793073 | 523.7292                  | 184.1708467 | 486.6216                    | 107.8811097 | 500.6703                    | 62.6628322  | 482.8803                    | 78.48090224 | 490.0517                    | 112.0658178 |
| 506.9247                  | 106.4807921 | 536.7083                  | 69.7133998  | 523.411                     | 282.807575  | 533.9142                    | 177.3452558 | 525.9175                    | 117.1822785 | 508.9698                    | 18.52867597 |
| 538.7249                  | 141.6818577 | 574.9157                  | 79.10196328 | 579.6188                    | 83.09804923 | 571.131                     | 87.52588307 | 538.6165                    | 163.2040179 | 543.3358                    | 170.2853086 |
| 615.8103                  | 59.48430194 | 574.2845                  | 25.01863575 | 610.2076                    | 21.04639158 | 646.6269                    | 81.82243127 | 622.5584                    | 35.32832708 | 665.5722                    | 83.51771076 |
| 684.6                     | 121.0886419 | 717.79                    | 888.9138161 | 713.821                     | 550.1992887 | 724.2048                    | 534.3421407 | 699.2277                    | 675.838309  | 721.2792                    | 532.9270696 |
| 717.4714                  | 789.0030358 | 741.6482                  | 11.61831099 | 814.5551                    | 21.06180977 | 790.6489                    | 11.46842972 | 834.7865                    | 29.26959436 | 797.693                     | 36.29348245 |
| 791.137                   | 8.97282484  | 867.2142                  | 63.08269346 | 877.882                     | 21.93418296 | 887.4755                    | 18.19305337 | 897.2542                    | 39.20906799 | 905.7844                    | 4.911297916 |
| 879.831                   | 27.26052626 | 888.9647                  | 18.26624186 | 925.2389                    | 272.1265178 | 922.8278                    | 142.8449156 | 968.1068                    | 116.7899113 | 929.0751                    | 99.9699103  |
| 943.7381                  | 26.44554682 | 973.7578                  | 54.0284012  | 973.6861                    | 23.84412911 | 954.3227                    | 94.06025345 | 979.0237                    | 122.7718534 | 969.8204                    | 81.36422447 |
| 978.5744                  | 55.15957047 | 978.3559                  | 119.3672207 | 997.9689                    | 66.98159119 | 995.0517                    | 28.04220237 | 1003.1417                   | 17.44786723 | 995.9519                    | 38.99543896 |
| 996.9925                  | 151.3665585 | 993.2869                  | 3.823172722 | 1005.8147                   | 86.88969337 | 1024.9394                   | 162.4625376 | 1047.9657                   | 214.0846185 | 1029.9111                   | 144.5022486 |
| 1002.8303                 | 20.3672713  | 1044.9774                 | 164.5996064 | 1036.2669                   | 33.07844653 | 1056.5568                   | 86.72819735 | 1061.9439                   | 14.16160624 | 1066.2359                   | 16.7525103  |
| 1038.3611                 | 29.52702658 | 1067.8325                 | 125.1899658 | 1072.6248                   | 51.12082932 | 1072.7902                   | 6.28499453  | 1082.9498                   | 126.0766955 | 1080.5735                   | 13.14657928 |
| 1051.1903                 | 56.43804604 | 1087.3424                 | 145.4783635 | 1130.3563                   | 178.9926596 | 1106.4463                   | 206.1073558 | 1091.6251                   | 294.8848263 | 1091.1415                   | 312.6170482 |
| 1119.1041                 | 421.538839  | 1110.3224                 | 59.11648115 | 1143.3683                   | 124.7302196 | 1121.6758                   | 11.35599693 | 1141.1533                   | 77.16227024 | 1135.147                    | 30.98253315 |
| 1159.5428                 | 395.5626217 | 1134.1637                 | 237.2483543 | 1154.7037                   | 232.7296495 | 1160.5275                   | 363.7845452 | 1163.1897                   | 321.7865733 | 1162.5279                   | 365.7957978 |
| 1170.6247                 | 83.75819722 | 1162.7296                 | 342.6848698 | 1226.8979                   | 33.68833846 | 1201.1185                   | 68.43649192 | 1196.87                     | 4.883126141 | 1187.1678                   | 29.92633266 |
| 1218.0011                 | 38.67451977 | 1224.8093                 | 133.4473914 | 1239.3937                   | 13.78077609 | 1260.911                    | 19.88068744 | 1249.5482                   | 6.924266764 | 1253.6066                   | 12.97565675 |
| 1232.722                  | 37.32497345 | 1296.4568                 | 3.615963817 | 1291.3632                   | 24.9296586  | 1298.5454                   | 12.50172294 | 1250.1319                   | 40.3990773  | 1300.6003                   | 16.47382104 |
| 1278.7659                 | 108.1886163 | 1314.7503                 | 8.282833684 | 1346.4542                   | 18.05852601 | 1351.3956                   | 18.9433524  | 1346.4939                   | 6.174483354 | 1340.658                    | 18.40590117 |
| 1334.0413                 | 14.94871238 | 1356.1571                 | 100.7062009 | 1358.1992                   | 400.4074345 | 1370.3441                   | 443.0825165 | 1373.7432                   | 495.4485827 | 1374.0655                   | 410.3413525 |
| 1373.54                   | 397.7852151 | 1374.6759                 | 370.7859754 | 1378.3897                   | 11.99143558 | 1385.5483                   | 40.73506394 | 1386.9139                   | 132.724014  | 1380.0144                   | 29.36454929 |
| 1383.0287                 | 7.917765489 | 1391.0235                 | 40.28793105 | 1399.0294                   | 72.27130554 | 1400.3549                   | 67.23194364 | 1399.9061                   | 48.54025908 | 1399.0385                   | 49.55898559 |
| 1410.5234                 | 60.06708149 | 1416.3949                 | 9.448236197 | 1419.3711                   | 71.05145068 | 1413.9671                   | 29.76910203 | 1420.9297                   | 64.38015537 | 1416.2731                   | 27.42773366 |
| 1430.8704                 | 53.49929101 | 1435.0264                 | 101.4795066 | 1436.1014                   | 7.341806349 | 1416.331                    | 42.84698729 | 1430.3087                   | 65.58185797 | 1420.1068                   | 107.5876416 |
| 1456.0054                 | 26.62282694 | 1461.2853                 | 5.197489335 | 1482.1011                   | 4.083335374 | 1477.2087                   | 22.46736954 | 1483.4846                   | 20.44066356 | 1482.5822                   | 15.41853604 |
| 1485.4871                 | 9.267137758 | 1485.4466                 | 27.38965463 | 1485.7368                   | 24.09018651 | 1489.7743                   | 9.05194835  | 1495.2358                   | 17.86381206 | 1489.2906                   | 33.62601329 |
| 1493.461                  | 6.245366374 | 1500.5203                 | 38.50374427 | 1491.5017                   | 13.66771607 | 1496.5056                   | 33.42950556 | 1512.6287                   | 38.84168816 | 1498.1241                   | 17.09094155 |
| 1502.9731                 | 29.15656687 | 1505.7916                 | 6.923065804 | 1503.973                    | 43.2759243  | 1514.2864                   | 21.26415593 | 1515.6498                   | 1.412141316 | 1519.0722                   | 16.57031299 |
| 1735.25                   | 18.73505162 | 1751.4724                 | 21.04653826 | 1761.5259                   | 50.35036937 | 1759.5721                   | 55.50283852 | 1771.1757                   | 6.736930509 | 1771.7819                   | 8.795092199 |
| 3053.6159                 | 29.15539802 | 3012.642                  | 39.76126074 | 3011.6985                   | 37.13173512 | 3057.9048                   | 18.01807807 | 3032.9815                   | 23.70437313 | 3052.5957                   | 17.60494302 |
| 3071.7103                 | 4.722401025 | 3058.8491                 | 12.51707466 | 3059.5038                   | 15.26843954 | 3060.6571                   | 13.62490786 | 3059.2619                   | 6.011620644 | 3053.4197                   | 25.55450325 |
| 3118.8452                 | 15.37829777 | 3093.0185                 | 19.94828646 | 3081.1673                   | 17.31480547 | 3083.4781                   | 26.76104451 | 3072.3277                   | 39.20138741 | 3087.0782                   | 30.10012609 |
| 3146.5388                 | 12.38707514 | 3115.6639                 | 8.397204544 | 3098.4002                   | 20.19406977 | 3104.396                    | 53.44121084 | 3107.5646                   | 14.56963115 | 3106.1547                   | 26.26603506 |
| 3157.8058                 | 7.124632747 | 3117.3669                 | 15.38546241 | 3111.1745                   | 7.697656144 | 3119.9394                   | 8.394136464 | 3117.3018                   | 5.921448398 | 3106.6141                   | 9.453233985 |
| 3174.0717                 | 3.60960667  | 3157.0793                 | 12.80985188 | 3148.2775                   | 8.531083752 | 3136.2715                   | 5.29706933  | 3124.6073                   | 21.20149223 | 3134.0895                   | 15.32806436 |
| 3185.5403                 | 4.467492478 | 3166.7716                 | 3.183055702 | 3172.5918                   | 16.6497351  | 3155.9812                   | 9.410533831 | 3164.3615                   | 10.38045158 | 3154.2004                   | 6.524792554 |
| 3269.2501                 | 2.551725515 | 3252.1596                 | 6.487850069 | 3204.0979                   | 0.236567524 | 3175.2116                   | 15.77635561 | 3174.3115                   | 14.21136768 | 3163.1174                   | 19.61214859 |
| 3882.5946                 | 66.77127804 | 3877.5334                 | 65.68955645 | 3830.2169                   | 62.49438126 | 3846.8722                   | 87.30516394 | 3873.5312                   | 40.27894281 | 3846.1377                   | 58.65822319 |



Table S41: Vibrational frequencies of transition state of ISOPO-OSO<sub>2</sub>s calculated by G16 at the M06-2X/aug-cc-pVTZ level of theory.

| 1,2-ISOPO-OSO <sub>2</sub> |             | 4,3-ISOPO-OSO <sub>2</sub> |             | E-1,4-ISOPO-OSO <sub>2</sub> |             | Z-1,4-ISOPO-OSO <sub>2</sub> |             | E-4,1-ISOPO-OSO <sub>2</sub> |             | Z-4,1-ISOPO-OSO <sub>2</sub> |             |
|----------------------------|-------------|----------------------------|-------------|------------------------------|-------------|------------------------------|-------------|------------------------------|-------------|------------------------------|-------------|
| Freq.                      | Intensity   | Freq.                      | Intensity   | Freq.                        | Intensity   | Freq.                        | Intensity   | Freq.                        | Intensity   | Freq.                        | Intensity   |
| -908.64                    | 641.0871    | -892.44                    | 594.8134    | -908.23                      | 285.0772    | -923.11                      | 305.2112    | -473.25                      | 1530.8424   | -1021.35                     | 580.5528    |
| 28.6296                    | 113.2597802 | 24.3169                    | 98.00862791 | 39.6236                      | 53.74424156 | 32.2389                      | 12.33736016 | 34.1381                      | 511.0779619 | 59.7015                      | 30.18367719 |
| 55.1763                    | 35.65247861 | 49.6362                    | 97.39568629 | 73.4599                      | 72.02756559 | 60.9799                      | 26.54150832 | 49.5805                      | 383.2534713 | 72.6031                      | 73.29517866 |
| 65.0445                    | 44.67521563 | 55.4124                    | 59.9643598  | 76.725                       | 40.38533668 | 88.064                       | 19.76940661 | 52.0211                      | 130.8375043 | 99.7952                      | 25.01688348 |
| 86.4394                    | 6.332127741 | 83.3127                    | 27.58633245 | 113.2855                     | 28.73931098 | 116.3655                     | 156.6919817 | 88.8436                      | 51.06886324 | 120.0034                     | 61.09589006 |
| 131.0313                   | 115.8262531 | 160.6592                   | 14.55121695 | 139.4707                     | 75.40543938 | 142.2476                     | 103.7625414 | 102.1103                     | 318.2913252 | 134.6168                     | 47.98533514 |
| 151.5966                   | 22.97112855 | 171.1811                   | 74.23848429 | 150.8956                     | 20.44989308 | 162.4169                     | 4.165833717 | 118.7331                     | 75.41454282 | 148.2221                     | 35.5950837  |
| 193.4556                   | 75.90462067 | 178.3567                   | 21.36993044 | 157.5254                     | 62.37904951 | 173.019                      | 31.39287913 | 161.107                      | 377.0472939 | 151.1712                     | 187.8435222 |
| 231.3524                   | 5.885313189 | 189.1067                   | 102.9780777 | 188.7222                     | 96.41706413 | 203.8294                     | 96.71621086 | 184.0719                     | 10.29035873 | 194.4285                     | 783.3954111 |
| 248.2065                   | 2.915623433 | 209.1194                   | 1.772265118 | 255.8234                     | 97.0888091  | 265.303                      | 47.86771627 | 221.3096                     | 38.67366428 | 217.2701                     | 1232.93567  |
| 301.6135                   | 12.06421253 | 261.8594                   | 73.96535834 | 287.5027                     | 97.0600864  | 271.8206                     | 20.29184263 | 267.9436                     | 557.7875064 | 246.42                       | 107.9704939 |
| 313.6222                   | 25.88091003 | 328.6368                   | 543.2814856 | 316.1322                     | 15.26063549 | 309.9382                     | 51.63052129 | 303.474                      | 1301.431889 | 290.6507                     | 225.4645779 |
| 352.5854                   | 1207.476307 | 358.7792                   | 107.7833547 | 419.2519                     | 10.95806612 | 390.5576                     | 77.36144455 | 333.3811                     | 135.1577722 | 343.6935                     | 10.572045   |
| 387.08                     | 72.9146165  | 374.5019                   | 271.011333  | 443.1378                     | 8.800952873 | 450.4861                     | 56.38551813 | 357.6069                     | 172.4276656 | 409.3425                     | 35.98076487 |
| 419.5902                   | 457.2720627 | 475.2686                   | 199.3319566 | 452.5392                     | 416.7258858 | 457.0164                     | 14.39972383 | 437.3315                     | 94.79906116 | 458.8064                     | 8.023028835 |
| 479.974                    | 381.1211283 | 490.8633                   | 222.9361316 | 459.9759                     | 620.1383502 | 474.0664                     | 772.0666441 | 454.972                      | 52.0766774  | 486.11                       | 185.5946683 |
| 492.2192                   | 153.4666662 | 492.4281                   | 177.1445753 | 484.0231                     | 143.9056793 | 486.9466                     | 137.4346553 | 466.3037                     | 365.4534501 | 500.4732                     | 230.5987201 |
| 499.3652                   | 18.68292935 | 515.3324                   | 71.06455991 | 503.2851                     | 73.80722582 | 501.2987                     | 79.41969367 | 498.006                      | 100.9641832 | 520.5172                     | 126.4133496 |
| 517.8767                   | 46.16246279 | 535.065                    | 6.632779051 | 548.9824                     | 127.134326  | 525.6815                     | 129.1056017 | 526.8641                     | 90.27828681 | 528.212                      | 100.4403519 |
| 567.0901                   | 29.0764683  | 540.2043                   | 277.2003552 | 594.9178                     | 59.40664665 | 632.9915                     | 19.0466347  | 559.6453                     | 253.2335192 | 647.7205                     | 64.73126719 |
| 652.3577                   | 364.6927251 | 708.9875                   | 213.0448918 | 795.9209                     | 78.42200489 | 779.7425                     | 24.63447807 | 725.0723                     | 589.7226961 | 796.4029                     | 24.28894984 |
| 780.5136                   | 17.86585097 | 842.4694                   | 19.9439232  | 816.8642                     | 77.58348093 | 810.3227                     | 126.9555815 | 806.0564                     | 12.46277752 | 852.0363                     | 32.33849425 |
| 871.8203                   | 17.96331012 | 881.1554                   | 131.2868839 | 875.2758                     | 62.47478806 | 877.4022                     | 51.76473397 | 903.2242                     | 1686.321948 | 898.6176                     | 38.31540041 |
| 880.4199                   | 76.17021176 | 888.8306                   | 7.53282532  | 928.664                      | 14.55690327 | 926.5398                     | 41.45953312 | 971.9496                     | 4.767823367 | 943.7604                     | 24.713067   |
| 941.6002                   | 57.54967204 | 975.839                    | 94.59702289 | 982.3853                     | 34.50490535 | 953.5429                     | 84.1522067  | 980.6507                     | 78.74238604 | 976.6473                     | 32.17301753 |
| 983.6458                   | 5.262303891 | 981.9383                   | 69.43125218 | 994.5529                     | 82.60681969 | 1032.9873                    | 147.5535194 | 1023.6616                    | 96.16145118 | 1018.0702                    | 123.4433507 |
| 998.4619                   | 184.948888  | 1028.7153                  | 18.13797322 | 1054.0539                    | 31.77615842 | 1053.8178                    | 14.96320535 | 1054.2351                    | 19.8729101  | 1035.4376                    | 221.1835169 |
| 1037.4144                  | 28.4468466  | 1071.743                   | 43.65826997 | 1070.4792                    | 34.84986151 | 1071.9882                    | 30.05627219 | 1078.4753                    | 867.5046215 | 1071.6832                    | 17.14272832 |
| 1047.0895                  | 66.86184308 | 1091.0302                  | 202.0703657 | 1126.7987                    | 132.6607162 | 1113.2343                    | 73.51023036 | 1087.1494                    | 216.1596623 | 1086.0902                    | 117.5690906 |
| 1119.0731                  | 269.1512309 | 1098.0609                  | 4.505443833 | 1144.2796                    | 177.2885224 | 1127.5644                    | 149.9665932 | 1105.9149                    | 88.11835686 | 1124.9059                    | 5.345175765 |
| 1146.3768                  | 93.01184296 | 1128.9595                  | 292.6637162 | 1179.7244                    | 357.3245269 | 1181.5979                    | 434.4362223 | 1155.8925                    | 285.444461  | 1173.2765                    | 43.91145206 |
| 1184.8632                  | 644.249273  | 1186.6247                  | 599.3122816 | 1215.9275                    | 90.55750241 | 1205.3703                    | 16.3531593  | 1186.9752                    | 4.60622019  | 1192.2809                    | 513.9110756 |
| 1196.1789                  | 51.24641771 | 1231.7678                  | 90.64311058 | 1228.1686                    | 78.77198658 | 1232.5818                    | 157.7372633 | 1210.4792                    | 98.52975694 | 1237.4223                    | 75.96063919 |
| 1263.2857                  | 69.33570947 | 1281.0386                  | 25.87922901 | 1242.91                      | 28.92442303 | 1251.05                      | 16.3341915  | 1237.6193                    | 120.5078361 | 1281.9918                    | 36.57759345 |
| 1270.8992                  | 119.4820407 | 1288.2802                  | 69.44284144 | 1323.616                     | 26.36328065 | 1335.2199                    | 28.67112556 | 1245.8506                    | 494.6120298 | 1342.5011                    | 87.4472221  |
| 1337.472                   | 17.7637044  | 1349.0296                  | 440.792716  | 1340.6992                    | 452.2325502 | 1346.898                     | 478.6016284 | 1306.346                     | 59.09798741 | 1351.2105                    | 322.4604975 |
| 1350.0134                  | 482.2843979 | 1356.3162                  | 95.30083868 | 1378.4491                    | 16.14456017 | 1385.5582                    | 16.89786502 | 1349.4551                    | 154.0035495 | 1359.6739                    | 150.6035961 |
| 1395.145                   | 36.67204827 | 1405.0988                  | 33.89613656 | 1402.8589                    | 51.16810128 | 1401.2843                    | 46.58021684 | 1386.4131                    | 61.97492164 | 1401.0962                    | 43.64858481 |
| 1410.6554                  | 51.02840126 | 1412.5589                  | 18.43377774 | 1417.4416                    | 62.80344204 | 1415.0188                    | 57.0058988  | 1407.8094                    | 171.5885662 | 1413.4897                    | 15.95036769 |
| 1429.1801                  | 40.12426074 | 1427.8683                  | 121.3098216 | 1428.3344                    | 5.398390801 | 1420.851                     | 97.31528431 | 1430.1444                    | 15.61398484 | 1424.0211                    | 111.8331425 |
| 1450.4368                  | 18.71839157 | 1452.5886                  | 4.29867397  | 1438.6124                    | 29.46710015 | 1432.3592                    | 24.56150655 | 1454.2224                    | 127.6743872 | 1459.9659                    | 23.76698022 |
| 1482.628                   | 18.76913332 | 1484.5501                  | 20.36821631 | 1483.9236                    | 18.89119936 | 1472.8089                    | 15.01107339 | 1482.3731                    | 38.06062905 | 1483.0543                    | 27.56645298 |
| 1495.8411                  | 27.73832498 | 1495.78                    | 13.05306248 | 1487.8443                    | 8.210760161 | 1487.8747                    | 45.65402547 | 1491.4307                    | 27.9038079  | 1496.1779                    | 27.0057556  |
| 1507.8352                  | 3.073865031 | 1502.8888                  | 22.73116063 | 1492.8191                    | 53.22709475 | 1493.5305                    | 23.42277364 | 1530.1149                    | 8.480874115 | 1528.8689                    | 17.79021966 |
| 1709.5872                  | 0.92898397  | 1724.5119                  | 21.32074714 | 1768.7585                    | 59.36578229 | 1753.9064                    | 65.59383341 | 1629.9646                    | 136.1065102 | 1768.2298                    | 23.45632279 |
| 3053.4072                  | 34.22794029 | 3057.8557                  | 16.69742054 | 2987.152                     | 16.44237219 | 2990.5581                    | 15.17168836 | 2991.671                     | 40.66565787 | 3007.8941                    | 13.55036982 |
| 3078.7347                  | 5.687745985 | 3065.2171                  | 17.40620651 | 3015.0088                    | 36.94316756 | 3059.108                     | 21.82367202 | 3066.5412                    | 6.875747541 | 3051.8772                    | 57.2203521  |
| 3122.0419                  | 16.14061434 | 3076.9716                  | 38.26784064 | 3062.399                     | 13.6131196  | 3064.6219                    | 10.70904591 | 3067.3245                    | 14.13166376 | 3053.2892                    | 17.5141868  |
| 3155.1729                  | 9.915922559 | 3121.815                   | 7.546311841 | 3081.369                     | 18.18706553 | 3092.0772                    | 22.77589713 | 3092.7956                    | 26.38593874 | 3108.8612                    | 8.36322305  |
| 3173.4077                  | 3.89485127  | 3123.8826                  | 13.89317712 | 3104.2676                    | 23.26283886 | 3111.1345                    | 27.3739563  | 3134.2024                    | 3.965337308 | 3127.9543                    | 7.302183363 |
| 3176.8048                  | 1.174288551 | 3155.1721                  | 10.05728491 | 3118.8095                    | 5.166067136 | 3123.1727                    | 7.951401422 | 3157.8297                    | 3.087717547 | 3136.6687                    | 11.52290692 |
| 3194.6305                  | 11.90201735 | 3165.7673                  | 5.607367791 | 3170.7425                    | 15.43975621 | 3159.0349                    | 7.759475325 | 3158.3373                    | 2.971139452 | 3152.4706                    | 17.31813244 |
| 3261.8071                  | 2.515352512 | 3253.6595                  | 3.66023215  | 3187.2954                    | 0.103511951 | 3167.2349                    | 9.129336565 | 3191.3418                    | 0.524153924 | 3167.8865                    | 16.24138342 |
| 3877.3523                  | 49.6629188  | 3888.1135                  | 41.36262548 | 3820.6849                    | 73.20119466 | 3853.8193                    | 75.97353044 | 3872.1301                    | 61.59857401 | 3870.6759                    | 44.92720002 |

Table S42: Vibrational frequencies of transition state of ISOPO-OSO<sub>2</sub>s calculated by G16 at the M06-2X/aug-cc-pV(T+d)Z level of theory.

| 1,2-ISOPO-OSO <sub>2</sub> |             | 4,3-ISOPO-OSO <sub>2</sub> |             | E-1,4-ISOPO-OSO <sub>2</sub> |             | Z-1,4-ISOPO-OSO <sub>2</sub> |             | E-4,1-ISOPO-OSO <sub>2</sub> |             | Z-4,1-ISOPO-OSO <sub>2</sub> |             |
|----------------------------|-------------|----------------------------|-------------|------------------------------|-------------|------------------------------|-------------|------------------------------|-------------|------------------------------|-------------|
| Freq.                      | Intensity   | Freq.                      | Intensity   | Freq.                        | Intensity   | Freq.                        | Intensity   | Freq.                        | Intensity   | Freq.                        | Intensity   |
| -912.31                    | 605.5097    | -897.5                     | 553.014     | -915.1                       | 288.9773    | -931.67                      | 310.0693    | -476.87                      | 1538.3224   | -1024.25                     | 578.4861    |
| 29.5375                    | 108.4954017 | 17.7124                    | 93.3135736  | 36.1537                      | 56.30929866 | 31.437                       | 15.29161136 | 33.1515                      | 544.4107753 | 56.7419                      | 30.22531745 |
| 56.112                     | 39.06071659 | 50.4386                    | 106.3104257 | 71.1319                      | 62.44448778 | 62.1301                      | 24.71457567 | 49.4651                      | 341.2736471 | 71.6322                      | 77.86409602 |
| 65.936                     | 36.06648549 | 56.7294                    | 40.28117393 | 75.3342                      | 57.96563034 | 86.7121                      | 20.78153803 | 53.4532                      | 160.1335571 | 98.143                       | 27.00301285 |
| 87.2573                    | 5.43152734  | 81.9019                    | 25.86959468 | 112.6882                     | 28.69339105 | 117.1411                     | 159.4858509 | 89.9387                      | 49.06311142 | 120.7283                     | 61.60802815 |
| 131.9328                   | 110.6926181 | 160.2061                   | 17.74243081 | 139.783                      | 75.25980221 | 143.3784                     | 97.54906129 | 104.0596                     | 288.8739662 | 131.8719                     | 44.29809995 |
| 154.4784                   | 24.40716293 | 168.7101                   | 63.11477848 | 150.8477                     | 30.63829865 | 164.0369                     | 3.879059435 | 118.5634                     | 75.11871021 | 149.5824                     | 92.55370807 |
| 195.8979                   | 71.20509201 | 178.8828                   | 21.14650828 | 158.0517                     | 47.70818674 | 174.9761                     | 29.33861578 | 162.2205                     | 374.5674051 | 151.0832                     | 151.120179  |
| 231.5419                   | 6.233705337 | 190.797                    | 109.7854262 | 192.3284                     | 95.52189872 | 205.3191                     | 94.93804821 | 184.4235                     | 8.894963001 | 193.5784                     | 883.818132  |
| 249.2511                   | 2.716139419 | 208.2667                   | 2.018961675 | 257.4413                     | 108.7424525 | 266.4518                     | 59.76494655 | 222.2899                     | 41.65278052 | 216.0742                     | 1197.397852 |
| 303.2965                   | 15.67497441 | 263.9309                   | 77.06994308 | 290.8337                     | 86.62902653 | 274.0585                     | 8.643790189 | 269.543                      | 579.0541282 | 250.2215                     | 80.82060605 |
| 313.7898                   | 24.96823525 | 320.6764                   | 672.5795449 | 317.1153                     | 15.82221074 | 313.3239                     | 50.05528777 | 305.4636                     | 1254.750343 | 292.4449                     | 209.0565268 |
| 352.881                    | 1230.387809 | 358.7755                   | 108.3838063 | 420.9638                     | 27.8078276  | 390.8077                     | 82.13525574 | 334.9126                     | 111.091425  | 345.9065                     | 10.72353858 |
| 388.1259                   | 64.31844462 | 372.0957                   | 189.1259965 | 445.1593                     | 116.7820943 | 460.0708                     | 41.18939209 | 357.8792                     | 173.0845865 | 409.9946                     | 36.79635095 |
| 420.5292                   | 441.6729427 | 486.5534                   | 146.9593374 | 455.2295                     | 891.1448799 | 462.0146                     | 31.29591991 | 440.4617                     | 102.5060863 | 459.2661                     | 8.64042347  |
| 492.0453                   | 299.0994237 | 499.1345                   | 247.9889306 | 462.0539                     | 49.83143107 | 474.6347                     | 805.7237118 | 456.1946                     | 72.64164755 | 495.5517                     | 162.5354864 |
| 500.2513                   | 268.3116973 | 502.3993                   | 180.2092086 | 498.4748                     | 153.7568275 | 500.3797                     | 111.3584528 | 475.6172                     | 329.7500193 | 514.451                      | 250.5068383 |
| 506.7339                   | 0.689654298 | 516.7265                   | 61.46383359 | 510.424                      | 53.15794027 | 502.3085                     | 89.03440926 | 501.4804                     | 128.1183594 | 526.0297                     | 117.3423331 |
| 524.7729                   | 14.78084207 | 538.6623                   | 91.99437349 | 553.0072                     | 126.9780524 | 534.8819                     | 122.3277598 | 531.1175                     | 56.84722753 | 536.0805                     | 107.435604  |
| 569.9457                   | 30.85917886 | 544.5036                   | 184.0151417 | 594.8713                     | 57.9104159  | 632.777                      | 18.71453487 | 574.8573                     | 251.8524526 | 648.4887                     | 64.73948186 |
| 654.2881                   | 329.5882646 | 710.9956                   | 184.998648  | 802.9003                     | 61.75986335 | 779.8541                     | 25.84948131 | 727.751                      | 496.5769203 | 796.9456                     | 24.23786925 |
| 780.5472                   | 19.34319076 | 844.0635                   | 19.19445843 | 818.8412                     | 96.03060428 | 818.0376                     | 129.2519976 | 807.0562                     | 9.943140095 | 859.4178                     | 39.59838216 |
| 873.6432                   | 9.82778905  | 888.2926                   | 12.48611397 | 875.4572                     | 62.88654881 | 878.7239                     | 49.81730623 | 920.9825                     | 1676.27701  | 899.7526                     | 39.20749365 |
| 890.3676                   | 67.9812856  | 891.7106                   | 102.4449146 | 931.3616                     | 13.70817573 | 928.823                      | 39.27878528 | 972.2611                     | 17.43046198 | 946.7789                     | 21.09775868 |
| 941.8101                   | 56.15044151 | 976.5385                   | 110.2729733 | 981.9806                     | 35.79803317 | 953.9645                     | 85.81872776 | 982.6158                     | 52.17922841 | 977.3204                     | 31.97370162 |
| 983.3809                   | 6.099831636 | 982.5409                   | 52.82432529 | 994.6193                     | 79.60349902 | 1032.7554                    | 145.7981441 | 1023.8819                    | 97.30927488 | 1018.4686                    | 123.6586805 |
| 998.188                    | 187.4371878 | 1029.1909                  | 21.83838391 | 1052.7287                    | 26.63997458 | 1052.9902                    | 10.2543243  | 1054.9787                    | 8.149501338 | 1035.7177                    | 218.7359572 |
| 1037.2683                  | 30.05812234 | 1071.5206                  | 52.47250503 | 1070.4383                    | 35.46799207 | 1071.9545                    | 32.21054108 | 1087.1406                    | 209.6548015 | 1072.1897                    | 17.43452616 |
| 1047.2501                  | 67.37004926 | 1089.7588                  | 194.6872442 | 1127.6848                    | 138.2638281 | 1114.1689                    | 77.77572735 | 1095.3828                    | 591.7563088 | 1086.7764                    | 122.5294326 |
| 1119.2866                  | 275.8088456 | 1099.7501                  | 6.082674194 | 1144.3345                    | 173.4549406 | 1127.9004                    | 151.0307716 | 1113.2903                    | 456.792311  | 1125.3899                    | 5.389669661 |
| 1147.0897                  | 93.02915881 | 1129.0255                  | 288.4223237 | 1195.7749                    | 329.5862565 | 1197.3814                    | 389.5929967 | 1155.6471                    | 292.2128301 | 1174.9645                    | 15.7944166  |
| 1193.2243                  | 209.6450499 | 1204.0266                  | 610.0853302 | 1219.3802                    | 90.15975128 | 1209.0328                    | 43.74425504 | 1187.8788                    | 3.907858958 | 1210.6306                    | 578.9874426 |
| 1208.6891                  | 505.581053  | 1231.4813                  | 100.4459023 | 1230.4116                    | 112.599226  | 1236.585                     | 173.3418389 | 1210.5651                    | 92.89935225 | 1239.8822                    | 58.00523584 |
| 1263.4033                  | 82.51879918 | 1282.1136                  | 16.06010241 | 1243.2781                    | 29.44979917 | 1252.2539                    | 21.82414194 | 1237.9371                    | 57.03581284 | 1282.8967                    | 36.18329619 |
| 1271.3069                  | 98.59340639 | 1289.6                     | 70.878005   | 1323.7344                    | 25.51888237 | 1335.628                     | 26.97416496 | 1276.6358                    | 576.9708089 | 1344.5335                    | 11.01841436 |
| 1337.9023                  | 12.09907396 | 1354.934                   | 47.8736285  | 1367.6943                    | 460.4776103 | 1375.4841                    | 492.9641218 | 1306.6591                    | 59.06489703 | 1357.9704                    | 14.90151726 |
| 1379.7044                  | 501.8690448 | 1378.2774                  | 514.6875932 | 1377.7185                    | 29.33588031 | 1385.4427                    | 42.74346022 | 1349.6518                    | 154.7410594 | 1381.2373                    | 506.785934  |
| 1394.9523                  | 40.99982411 | 1405.4371                  | 34.65722337 | 1401.9943                    | 53.15623318 | 1401.9812                    | 33.14260515 | 1386.4917                    | 62.5931998  | 1402.1385                    | 78.38533809 |
| 1410.8038                  | 50.40715019 | 1412.4858                  | 15.56911525 | 1417.2767                    | 58.12714838 | 1415.187                     | 54.99679516 | 1407.8804                    | 167.5672243 | 1413.7641                    | 15.60752391 |
| 1429.697                   | 39.41606564 | 1428.2768                  | 116.2980043 | 1428.879                     | 3.263821188 | 1421.0262                    | 94.48408915 | 1430.0639                    | 14.36565235 | 1424.7348                    | 120.3373017 |
| 1451.0985                  | 19.36279712 | 1452.9775                  | 3.7917709   | 1440.4219                    | 27.20498334 | 1435.7591                    | 23.57834924 | 1454.4561                    | 124.3028971 | 1462.1646                    | 21.30240269 |
| 1482.907                   | 17.26632312 | 1484.3744                  | 20.40556596 | 1484.3168                    | 19.22161991 | 1472.9981                    | 15.17733395 | 1482.5885                    | 37.32696006 | 1483.2219                    | 28.05716393 |
| 1496.2735                  | 27.0418905  | 1495.7592                  | 12.78279612 | 1487.7655                    | 8.536993557 | 1488.2378                    | 45.28877714 | 1491.4023                    | 28.00919653 | 1496.2716                    | 26.73664203 |
| 1507.5789                  | 3.287938206 | 1502.3345                  | 22.97614947 | 1492.9269                    | 53.41057251 | 1493.6895                    | 22.9061447  | 1531.0966                    | 8.026755214 | 1530.638                     | 16.33798297 |
| 1711.4009                  | 0.838253213 | 1726.1387                  | 19.89384512 | 1768.9367                    | 60.86653549 | 1754.073                     | 67.39822315 | 1633.0293                    | 144.2166934 | 1768.4972                    | 23.03003697 |
| 3053.0719                  | 34.14389023 | 3057.6312                  | 17.32831146 | 2992.8598                    | 14.79411964 | 2996.5343                    | 13.53397393 | 2992.9268                    | 40.36254567 | 3011.4748                    | 12.60495859 |
| 3079.0638                  | 5.625205861 | 3065.373                   | 17.28350652 | 3015.596                     | 36.89932901 | 3059.224                     | 22.23010099 | 3066.5849                    | 6.592438156 | 3051.8741                    | 57.55152295 |
| 3122.1149                  | 16.11634233 | 3078.4622                  | 36.15227628 | 3062.5659                    | 13.84685155 | 3064.6246                    | 10.59278955 | 3067.4019                    | 14.23665404 | 3053.3078                    | 17.39348257 |
| 3155.439                   | 9.827344454 | 3121.4662                  | 9.639965903 | 3081.7001                    | 18.06200033 | 3092.9197                    | 23.60216119 | 3092.658                     | 25.80650285 | 3108.8794                    | 8.371258419 |
| 3173.5831                  | 3.884328081 | 3123.7793                  | 11.87644757 | 3106.8879                    | 23.3408071  | 3113.3351                    | 26.60781329 | 3134.2681                    | 3.90924957  | 3130.2951                    | 6.771268084 |
| 3177.1679                  | 1.233420828 | 3155.5182                  | 10.18007936 | 3118.8231                    | 5.013827482 | 3123.1437                    | 7.90778934  | 3158.0032                    | 1.99494933  | 3137.2398                    | 11.81735261 |
| 3194.2446                  | 11.25425989 | 3165.5568                  | 5.543971943 | 3171.548                     | 15.73143449 | 3158.9562                    | 7.928390033 | 3159.4706                    | 3.745484922 | 3152.4965                    | 17.30166556 |
| 3262.1815                  | 2.596999679 | 3253.3261                  | 3.801871471 | 3187.8442                    | 0.082344786 | 3167.4717                    | 9.269716882 | 3191.3814                    | 0.557773859 | 3167.8759                    | 16.72577562 |
| 3878.5281                  | 49.96219887 | 3889.9363                  | 41.07628764 | 3821.2038                    | 71.7686783  | 3855.3587                    | 76.28249514 | 3872.1945                    | 62.09393258 | 3870.6339                    | 44.63672565 |

Table S43: Vibrational frequencies of ISOPOs calculated by G16 at the M06-2X/aug-cc-pVTZ level of theory.

| 1,2-ISOPO |             | 4,3-ISOPO |             | <i>E</i> -1,4-ISOPO |             | Z-1,4-ISOPO |             | <i>E</i> -4,1-ISOPO |             | Z-4,1-ISOPO |             |
|-----------|-------------|-----------|-------------|---------------------|-------------|-------------|-------------|---------------------|-------------|-------------|-------------|
| Freq.     | Intensity   | Freq.     | Intensity   | Freq.               | Intensity   | Freq.       | Intensity   | Freq.               | Intensity   | Freq.       | Intensity   |
| 97.1063   | 1.696719085 | 51.7695   | 58.63553788 | 52.5874             | 510.757631  | 39.0696     | 752.1832057 | 20.459              | 574.8444949 | 40.9182     | 648.481089  |
| 147.0623  | 228.5336103 | 124.5729  | 199.0360966 | 85.5578             | 100.1851292 | 70.4028     | 28.8313163  | 65.2228             | 25.15744722 | 74.2814     | 28.89412153 |
| 217.2819  | 9.29774105  | 169.247   | 147.6350701 | 138.3289            | 127.2937342 | 149.1538    | 46.97820361 | 226.1857            | 65.69693583 | 146.8918    | 15.7846644  |
| 220.2894  | 17.59367255 | 190.3486  | 19.86015643 | 151.8359            | 66.4716083  | 192.6467    | 97.75795944 | 251.8139            | 0.711334613 | 192.6706    | 10.3404726  |
| 303.7492  | 2.202547178 | 264.3234  | 248.2836666 | 224.0814            | 186.2585451 | 257.7652    | 83.27172848 | 310.6867            | 947.6823069 | 251.6763    | 271.001809  |
| 317.2476  | 201.7990164 | 296.8405  | 216.321363  | 308.3336            | 8.985840308 | 264.7594    | 12.91479172 | 347.3643            | 418.6461035 | 283.4803    | 41.8134789  |
| 337.1826  | 156.3884252 | 332.6407  | 233.4171548 | 333.2508            | 1311.825638 | 307.8268    | 1180.532023 | 371.5184            | 98.60034848 | 324.2989    | 1291.361123 |
| 384.9462  | 69.71643107 | 395.8495  | 888.0630529 | 405.5186            | 341.8997777 | 393.1346    | 254.049785  | 420.887             | 63.43802229 | 389.324     | 18.5562661  |
| 434.6441  | 925.2553747 | 453.2918  | 258.6800932 | 433.6028            | 22.1577562  | 444.3729    | 49.55000866 | 441.7583            | 39.48503567 | 433.135     | 55.49244547 |
| 497.5534  | 36.25030914 | 527.7856  | 51.07218041 | 494.4498            | 29.8577611  | 491.588     | 16.1089242  | 458.9303            | 23.78963397 | 497.5556    | 12.85685203 |
| 554.4986  | 11.25595669 | 570.5581  | 75.66637262 | 586.3038            | 22.08069176 | 628.0323    | 39.44980789 | 593.4922            | 134.2263334 | 612.4311    | 37.24464442 |
| 689.637   | 70.30704279 | 709.4632  | 124.7776166 | 732.3478            | 65.75457465 | 707.9249    | 95.65763972 | 756.6741            | 11.86368348 | 739.3363    | 57.23503244 |
| 769.3304  | 25.81675425 | 784.5499  | 303.1825453 | 842.6968            | 5.007714002 | 824.7189    | 2.236275191 | 803.2005            | 130.4713924 | 784.8414    | 25.76095757 |
| 888.1342  | 42.87909259 | 844.9171  | 16.54227826 | 876.3397            | 78.93668741 | 898.3581    | 39.43221875 | 898.2722            | 119.5230783 | 901.8657    | 38.21102475 |
| 928.422   | 7.866454923 | 895.6114  | 31.43770836 | 978.251             | 22.29574357 | 953.2172    | 116.3881085 | 939.7579            | 46.32628882 | 967.265     | 120.2632575 |
| 960.6979  | 13.67826044 | 956.3415  | 186.6346251 | 990.7943            | 66.13426549 | 1017.7384   | 55.8702315  | 976.8651            | 57.21553206 | 1027.4354   | 106.1227015 |
| 980.9038  | 166.5136868 | 975.8508  | 3.620032277 | 1052.7537           | 20.96609964 | 1059.8197   | 156.0706968 | 1050.1078           | 236.0933752 | 1057.3758   | 32.49278952 |
| 1036.6819 | 39.16427515 | 1034.9618 | 44.13207301 | 1069.0202           | 58.0399705  | 1073.1328   | 4.229055786 | 1081.2202           | 198.1913457 | 1070.2828   | 20.61936202 |
| 1045.1679 | 39.64518624 | 1068.2225 | 18.16926461 | 1099.508            | 33.59596047 | 1090.6995   | 257.1101414 | 1099.2014           | 59.84923224 | 1081.0292   | 323.715908  |
| 1091.4917 | 166.4993055 | 1071.3691 | 38.09325311 | 1137.9708           | 225.9967478 | 1114.0073   | 21.92685929 | 1137.2417           | 37.16752849 | 1114.9072   | 113.9201943 |
| 1138.0824 | 318.840543  | 1129.3641 | 595.8277047 | 1151.6198           | 81.59348293 | 1139.7869   | 29.493109   | 1147.2465           | 11.65752594 | 1163.1408   | 3.910027944 |
| 1181.797  | 27.89243318 | 1191.1216 | 28.99001084 | 1217.5512           | 81.23578761 | 1201.821    | 70.66600394 | 1165.6815           | 7.509029547 | 1201.1885   | 34.01382421 |
| 1227.9093 | 17.65731147 | 1218.4533 | 37.52076287 | 1229.5874           | 7.93150684  | 1240.1012   | 13.63876529 | 1193.4074           | 39.55442599 | 1248.1204   | 8.336333055 |
| 1243.9688 | 33.31262444 | 1302.3437 | 35.42336135 | 1312.1832           | 12.60224269 | 1328.343    | 18.04766221 | 1278.1514           | 29.14037567 | 1329.0399   | 8.4804418   |
| 1322.9212 | 0.588946123 | 1319.7761 | 15.78104573 | 1370.8427           | 38.13963959 | 1363.6419   | 61.94141974 | 1339.8593           | 58.85485252 | 1357.8244   | 51.54157102 |
| 1365.9521 | 5.84382516  | 1362.1749 | 60.61055365 | 1372.476            | 50.00451909 | 1372.8496   | 36.7724414  | 1365.5084           | 38.22873873 | 1367.7671   | 49.27219715 |
| 1376.128  | 30.18121668 | 1410.1179 | 26.54622968 | 1388.8805           | 44.43462339 | 1389.2608   | 13.4198351  | 1398.6979           | 93.84638639 | 1385.0329   | 42.08786285 |
| 1418.0325 | 134.2280483 | 1411.9317 | 114.8674272 | 1420.5505           | 59.62596098 | 1413.045    | 31.63776536 | 1426.5213           | 48.00936658 | 1415.7021   | 11.54463446 |
| 1457.7123 | 29.60372261 | 1452.6992 | 2.056901146 | 1429.4089           | 24.25691458 | 1421.2678   | 98.42018352 | 1456.7538           | 46.07533158 | 1422.3373   | 141.0966547 |
| 1478.163  | 19.41526542 | 1477.7747 | 18.60130899 | 1488.0538           | 23.17573782 | 1479.0135   | 21.26067762 | 1488.2603           | 19.18543083 | 1479.6162   | 22.64138882 |
| 1494.7703 | 11.3193527  | 1492.1041 | 39.64227177 | 1491.7151           | 7.759415725 | 1496.6642   | 37.58285093 | 1500.1666           | 10.66805953 | 1496.6008   | 32.87052711 |
| 1519.1433 | 2.32539708  | 1510.9598 | 6.311125283 | 1499.8606           | 25.64117614 | 1514.4578   | 9.617231297 | 1510.3618           | 5.878857492 | 1512.6009   | 5.850637959 |
| 1731.2201 | 18.69939186 | 1744.1734 | 27.04949665 | 1778.0009           | 21.61094517 | 1767.5671   | 15.53131377 | 1526.5981           | 7.315559393 | 1767.8626   | 15.21391894 |
| 3039.4607 | 44.37364543 | 2988.1268 | 7.195964048 | 2916.2116           | 28.56685549 | 2915.7933   | 26.61250779 | 3038.1392           | 32.45918093 | 2913.1485   | 20.62001112 |
| 3078.2644 | 8.546530332 | 3057.8186 | 30.38005878 | 3011.245            | 57.34315351 | 3039.4437   | 5.486950416 | 3066.1427           | 6.071382479 | 3047.388    | 4.47287122  |
| 3118.7987 | 17.30914139 | 3061.7469 | 30.87230565 | 3041.512            | 8.067561976 | 3057.8116   | 21.60813193 | 3072.4391           | 37.89814373 | 3056.3024   | 23.77711874 |
| 3163.1326 | 6.953090693 | 3117.6125 | 11.08929279 | 3058.0747           | 29.32448551 | 3072.882    | 36.91080795 | 3111.0443           | 27.48567184 | 3071.6819   | 46.05854423 |
| 3168.8973 | 8.345274047 | 3150.5966 | 8.819710426 | 3080.0053           | 18.6739744  | 3107.7022   | 33.12877874 | 3134.8053           | 14.53312565 | 3103.5789   | 20.19392292 |
| 3177.9988 | 9.861774001 | 3156.5911 | 2.406965964 | 3104.8008           | 14.91423651 | 3118.4473   | 11.33552985 | 3157.7583           | 13.49676771 | 3118.4889   | 10.38347189 |
| 3178.5365 | 0.599187178 | 3157.4435 | 15.55204223 | 3172.5022           | 15.73273888 | 3153.5768   | 9.788744675 | 3190.3645           | 4.657558244 | 3154.8509   | 2.652347544 |
| 3255.011  | 6.857573233 | 3241.9945 | 9.912598778 | 3184.04             | 2.175973435 | 3164.9952   | 14.29113976 | 3204.2142           | 18.21877329 | 3159.5919   | 23.24566054 |
| 3836.2135 | 53.75871381 | 3857.1104 | 62.46025996 | 3867.9529           | 38.63955827 | 3869.4984   | 38.3147266  | 3864.7744           | 34.63546165 | 3873.6994   | 37.18182388 |

Table S44: Vibrational frequencies of ISOPOs calculated by G16 at the M06-2X/aug-cc-pV(T+d)Z level of theory.

| 1,2-ISOPO |             | 4,3-ISOPO |             | <i>E</i> -1,4-ISOPO |             | Z-1,4-ISOPO |             | <i>E</i> -4,1-ISOPO |             | Z-4,1-ISOPO |             |
|-----------|-------------|-----------|-------------|---------------------|-------------|-------------|-------------|---------------------|-------------|-------------|-------------|
| Freq.     | Intensity   | Freq.     | Intensity   | Freq.               | Intensity   | Freq.       | Intensity   | Freq.               | Intensity   | Freq.       | Intensity   |
| 97.1099   | 1.696656185 | 51.7701   | 58.6425643  | 52.5828             | 510.8174864 | 39.0668     | 752.2575398 | 20.4534             | 575.0018834 | 40.9069     | 648.6407187 |
| 147.0641  | 228.5389512 | 124.5723  | 199.0306503 | 85.5648             | 100.1909204 | 70.4012     | 28.82630488 | 65.2201             | 25.15237188 | 74.2755     | 28.91252995 |
| 217.2817  | 9.299585657 | 169.247   | 147.6114986 | 138.3313            | 127.2857578 | 149.1523    | 46.97065192 | 226.1855            | 65.69346638 | 146.8911    | 15.78473962 |
| 220.2895  | 17.59366456 | 190.3481  | 19.86230444 | 151.8363            | 66.46880576 | 192.6459    | 97.75008202 | 251.8117            | 0.711340828 | 192.6705    | 10.34254854 |
| 303.7492  | 2.203860563 | 264.3238  | 248.247068  | 224.0806            | 186.2716725 | 257.7661    | 83.2420318  | 310.6907            | 947.5866432 | 251.6753    | 271.0076412 |
| 317.2474  | 201.7752511 | 296.8422  | 216.2784618 | 308.3336            | 8.985840308 | 264.7602    | 12.89968473 | 347.3661            | 418.7185847 | 283.4806    | 41.81906381 |
| 337.1898  | 156.4253123 | 332.6426  | 233.3810417 | 333.246             | 1311.858899 | 307.8398    | 1180.451067 | 371.5184            | 98.60142229 | 324.2965    | 1291.365759 |
| 384.947   | 69.70384999 | 395.8557  | 888.0652685 | 405.5182            | 341.8794556 | 393.1363    | 254.1024688 | 420.8864            | 63.44190415 | 389.3274    | 18.55507936 |
| 434.6479  | 925.2491212 | 453.294   | 258.749245  | 433.6028            | 22.15867768 | 444.3727    | 49.55182648 | 441.7581            | 39.48415047 | 433.1344    | 55.49068023 |
| 497.5478  | 36.2475099  | 527.7862  | 51.07061061 | 494.4496            | 29.85696634 | 491.5878    | 16.10974229 | 458.9302            | 23.79137771 | 497.5558    | 12.85764866 |
| 554.4984  | 11.25596075 | 570.5578  | 75.66641241 | 586.3035            | 22.08002263 | 628.0323    | 39.45044311 | 593.4888            | 134.2271023 | 612.4341    | 37.23273677 |
| 689.6394  | 70.31084744 | 709.4641  | 124.7740844 | 732.3464            | 65.75633457 | 707.9247    | 95.65879381 | 756.6738            | 11.86368818 | 739.4327    | 57.24105873 |
| 769.3299  | 25.81832669 | 784.551   | 303.1821202 | 842.6963            | 5.007716974 | 824.7186    | 2.235792277 | 803.2001            | 130.4714574 | 784.8409    | 25.74267494 |
| 888.1385  | 42.87169801 | 844.9173  | 16.54321867 | 876.3385            | 78.9367955  | 898.3576    | 39.43312885 | 898.2718            | 119.5253521 | 901.8667    | 38.21496352 |
| 928.4238  | 7.867728759 | 895.6118  | 31.43635801 | 978.2514            | 22.29573445 | 953.2177    | 116.3842808 | 939.7583            | 46.32329751 | 967.2654    | 120.2830049 |
| 960.6956  | 13.68120002 | 956.3412  | 186.635518  | 990.7936            | 66.13431221 | 1017.7381   | 55.87024797 | 976.8642            | 57.21517639 | 1027.4396   | 106.1036299 |
| 980.9027  | 166.5106199 | 975.8508  | 3.620032277 | 1052.7549           | 20.96531784 | 1059.8212   | 156.0674645 | 1050.1082           | 236.0799886 | 1057.3827   | 32.49823683 |
| 1036.6817 | 39.15658623 | 1034.9612 | 44.13171313 | 1069.0205           | 58.0403274  | 1073.1327   | 4.229427933 | 1081.2211           | 198.2055706 | 1070.2792   | 20.64142325 |
| 1045.1658 | 39.6479378  | 1068.2225 | 18.16851769 | 1099.5075           | 33.59488724 | 1090.701    | 257.1061301 | 1099.2012           | 59.84851726 | 1081.0295   | 323.6874024 |
| 1091.4904 | 166.5108343 | 1071.369  | 38.09400139 | 1137.9717           | 225.9944657 | 1114.0073   | 21.93044041 | 1137.2401           | 37.16863317 | 1114.9079   | 113.9290684 |
| 1138.0812 | 318.8426319 | 1129.3654 | 595.8227799 | 1151.6193           | 81.59802177 | 1139.7868   | 29.49451163 | 1147.2463           | 11.65752797 | 1163.1406   | 3.909685632 |
| 1181.7975 | 27.89208381 | 1191.1213 | 28.99102293 | 1217.5507           | 81.23647629 | 1201.8214   | 70.66797209 | 1165.6818           | 7.508685377 | 1201.1857   | 34.0168926  |
| 1227.9085 | 17.6560234  | 1218.454  | 37.52106873 | 1229.5871           | 7.931184325 | 1240.1013   | 13.63844249 | 1193.4071           | 39.55443594 | 1248.1146   | 8.339887767 |
| 1243.9661 | 33.31333814 | 1302.3431 | 35.42368399 | 1312.1827           | 12.6022475  | 1328.3429   | 18.0479639  | 1278.1506           | 29.14070604 | 1329.0391   | 8.488551537 |
| 1322.9202 | 0.588645008 | 1319.776  | 15.78074464 | 1370.8424           | 38.14866949 | 1363.642    | 61.94258541 | 1339.8586           | 58.85518102 | 1357.8141   | 51.52550863 |
| 1365.9513 | 5.842368282 | 1362.1754 | 60.60877419 | 1372.4754           | 49.99582079 | 1372.8497   | 36.7692422  | 1365.5082           | 38.2269914  | 1367.7789   | 49.24960517 |
| 1376.128  | 30.18817428 | 1410.1184 | 26.53377212 | 1388.8801           | 44.43463619 | 1389.2612   | 13.41925692 | 1398.6976           | 93.84840308 | 1385.0314   | 42.10288634 |
| 1418.0325 | 134.2283296 | 1411.9324 | 114.8840406 | 1420.5509           | 59.62510169 | 1413.0448   | 31.63438192 | 1426.5214           | 48.00992254 | 1415.703    | 11.54434533 |
| 1457.7122 | 29.60536669 | 1452.6992 | 2.056901146 | 1429.4089           | 24.25719367 | 1421.2683   | 98.42716621 | 1456.7523           | 46.07510516 | 1422.3363   | 141.0947906 |
| 1478.163  | 19.41553531 | 1477.7742 | 18.60131529 | 1488.0541           | 23.17573314 | 1479.0134   | 21.26067905 | 1488.2602           | 19.18516406 | 1479.6161   | 22.64139035 |
| 1494.7703 | 11.3193527  | 1492.1042 | 39.64226912 | 1491.7154           | 7.759949038 | 1496.6641   | 37.58285344 | 1500.1661           | 10.66832901 | 1496.6007   | 32.86839679 |
| 1519.1433 | 2.325134472 | 1510.9597 | 6.3111257   | 1499.8611           | 25.64090161 | 1514.4579   | 9.617230662 | 1510.3614           | 5.879123184 | 1512.6004   | 5.850903637 |
| 1731.2184 | 18.69871891 | 1744.1721 | 27.04974554 | 1778.0008           | 21.61094638 | 1767.5678   | 15.53108192 | 1526.5981           | 7.315559393 | 1767.8616   | 15.21279924 |
| 3039.4675 | 44.37315239 | 2988.1298 | 7.195956823 | 2916.2134           | 28.56697466 | 2915.7944   | 26.61249775 | 3038.1439           | 32.45808023 | 2913.1529   | 20.62039081 |
| 3078.2637 | 8.546402677 | 3057.8204 | 30.36321086 | 3011.2433           | 57.34331837 | 3039.4433   | 5.487082392 | 3066.1454           | 6.071767466 | 3047.3894   | 4.476927436 |
| 3118.798  | 17.30876154 | 3061.746  | 30.88912319 | 3041.5129           | 8.066903764 | 3057.8115   | 21.60813264 | 3072.4445           | 37.89833681 | 3056.3031   | 23.77659118 |
| 3163.1307 | 6.954860575 | 3117.6092 | 11.08879268 | 3058.0734           | 29.32593298 | 3072.8808   | 36.90965393 | 3111.0424           | 27.4855604  | 3071.6865   | 46.05730637 |
| 3168.9001 | 8.343881859 | 3150.596  | 8.82059847  | 3080.0024           | 18.67373293 | 3107.7015   | 33.13045503 | 3134.8077           | 14.53324179 | 3103.5831   | 20.19261018 |
| 3178.0008 | 9.863650769 | 3156.5903 | 2.40721934  | 3104.7985           | 14.91399058 | 3118.4483   | 11.33539828 | 3157.7576           | 13.49651803 | 3118.4893   | 10.38385434 |
| 3178.5381 | 0.596676668 | 3157.4494 | 15.55176048 | 3172.4992           | 15.73300525 | 3153.5779   | 9.78874126  | 3190.3685           | 4.65692718  | 3154.8519   | 2.646656329 |
| 3255.0134 | 6.8578133   | 3241.9961 | 9.912347779 | 3184.0461           | 2.175593387 | 3164.9969   | 14.29075394 | 3204.2122           | 18.21940719 | 3159.5911   | 23.25033816 |
| 3836.2095 | 53.75876987 | 3857.1017 | 62.46019398 | 3867.956            | 38.63963044 | 3869.4891   | 38.31471559 | 3864.7724           | 34.6355828  | 3873.7004   | 37.1817113  |

Table S45: Vibrational frequencies of the complexes of *E*-1,4-ISOPOO-SO<sub>2</sub> and *E*-1,4-ISOPO-SO<sub>3</sub> calculated by G16 at the M06-2X/aug-cc-pVTZ level of theory.

| <i>E</i> -1,4-ISOPOO-SO <sub>2</sub> |             | <i>E</i> -1,4-ISOPO-SO <sub>3</sub> |             |
|--------------------------------------|-------------|-------------------------------------|-------------|
| Freq.                                | Intensity   | Freq.                               | Intensity   |
| 27.9789                              | 333.5797764 | 15.9142                             | 204.581268  |
| 57.1054                              | 235.9180569 | 64.811                              | 270.0942252 |
| 75.1137                              | 78.61025466 | 89.3352                             | 93.10880336 |
| 82.6254                              | 0.878749544 | 134.201                             | 36.34129638 |
| 86.6241                              | 38.60257015 | 141.7573                            | 54.6554476  |
| 107.4875                             | 34.64313087 | 154.1849                            | 509.8907786 |
| 121.0581                             | 33.20815175 | 173.2564                            | 88.74440715 |
| 131.2182                             | 54.53953787 | 201.0246                            | 19.61312917 |
| 159.5269                             | 32.18988351 | 210.6557                            | 52.09275332 |
| 163.9178                             | 804.6220211 | 216.8134                            | 142.6563026 |
| 181.3958                             | 19.01715436 | 272.3866                            | 664.8312175 |
| 244.5846                             | 63.27817531 | 300.5258                            | 427.2775608 |
| 331.3016                             | 17.46993598 | 402.0126                            | 167.0324214 |
| 359.6597                             | 25.8835194  | 454.843                             | 560.3977021 |
| 435.0821                             | 25.40445682 | 468.2048                            | 1064.866779 |
| 469.1436                             | 128.2764162 | 481.5592                            | 638.5042961 |
| 489.178                              | 804.6867149 | 487.7545                            | 1151.642317 |
| 540.479                              | 290.5479188 | 522.2754                            | 149.1293695 |
| 577.0063                             | 85.90800388 | 529.1169                            | 99.44599367 |
| 599.3537                             | 21.34831948 | 589.7568                            | 35.09546913 |
| 808.803                              | 5.264426369 | 671.5821                            | 27.33665456 |
| 871.2356                             | 19.75705876 | 859.3977                            | 18.67696583 |
| 910.1294                             | 208.2375377 | 880.2386                            | 87.80368357 |
| 979.837                              | 32.67412135 | 987.2902                            | 77.28387614 |
| 986.2252                             | 100.1433705 | 994.6652                            | 87.62061182 |
| 1024.1888                            | 15.93750916 | 1058.1467                           | 42.18297113 |
| 1071.673                             | 34.77344204 | 1073.481                            | 7.269490793 |
| 1133.9076                            | 124.4272711 | 1081.5265                           | 123.4882818 |
| 1148.4085                            | 154.4570408 | 1105.5437                           | 50.78477155 |
| 1219.692                             | 22.4303271  | 1153.7813                           | 238.5672722 |
| 1230.3791                            | 153.9316197 | 1162.9111                           | 45.41777006 |
| 1244.4123                            | 67.68860735 | 1208.1116                           | 65.58947515 |
| 1255.4437                            | 33.13969913 | 1237.8447                           | 98.42994338 |
| 1297.4784                            | 42.8236271  | 1306.2421                           | 0.716797881 |
| 1351.6273                            | 2.833194151 | 1359.1374                           | 24.51455546 |
| 1390.3956                            | 52.38654287 | 1374.5915                           | 518.2557032 |
| 1396.0647                            | 644.5372936 | 1394.2877                           | 229.5081112 |
| 1412.3476                            | 22.49754482 | 1399.1953                           | 267.6509161 |
| 1420.9684                            | 32.44286044 | 1411.0982                           | 205.9349861 |
| 1431.7656                            | 7.002092839 | 1412.9861                           | 17.88131569 |
| 1478.2151                            | 5.543861736 | 1425.0463                           | 15.58809884 |
| 1487.4751                            | 23.21747461 | 1470.2267                           | 13.6902062  |
| 1489.8918                            | 14.15964056 | 1477.8906                           | 49.24949023 |
| 1505.503                             | 38.49714443 | 1493.7458                           | 41.05906021 |
| 1769.1597                            | 41.46884993 | 1705.367                            | 175.5488126 |
| 3024.636                             | 30.97899167 | 2946.5977                           | 11.9172949  |
| 3062.5195                            | 15.68340998 | 2989.4699                           | 1.391732542 |
| 3076.4446                            | 24.16167287 | 3028.0789                           | 24.6889572  |
| 3106.8039                            | 17.94918394 | 3059.1565                           | 3.17453196  |
| 3118.8027                            | 5.605848067 | 3072.8351                           | 9.341507158 |
| 3161.8061                            | 6.125904841 | 3123.9684                           | 2.258425307 |
| 3174.7447                            | 15.164699   | 3172.0344                           | 4.981913489 |
| 3192.5555                            | 0.820483256 | 3186.4354                           | 4.441573239 |
| 3839.2493                            | 128.2835817 | 3850.3167                           | 79.39553333 |

Table S46: Vibrational frequencies of the complexes of *E*-1,4-ISOPOO-SO<sub>2</sub> and *E*-1,4-ISOPO-SO<sub>3</sub> calculated by G16 at the M06-2X/aug-cc-pV(T+d)Z level of theory.

| <i>E</i> -1,4-ISOPOO_SO <sub>2</sub> |             | <i>E</i> -1,4-ISOPO_SO <sub>3</sub> |             |
|--------------------------------------|-------------|-------------------------------------|-------------|
| Freq.                                | Intensity   | Freq.                               | Intensity   |
| 20.0422                              | 529.2736164 | 22.5981                             | 145.0603298 |
| 58.1403                              | 240.9407935 | 65.7407                             | 278.7390316 |
| 72.1879                              | 53.65036234 | 93.3083                             | 91.0938265  |
| 79.4522                              | 7.832961123 | 136.0329                            | 37.95756063 |
| 87.2886                              | 26.27039067 | 142.8017                            | 57.52150876 |
| 103.9025                             | 8.746514537 | 154.1842                            | 493.1576418 |
| 112.8743                             | 63.19103289 | 174.4243                            | 89.2434695  |
| 129.2663                             | 56.76729023 | 202.5261                            | 26.17495355 |
| 155.9806                             | 39.52040738 | 213.6357                            | 39.72857982 |
| 162.7906                             | 761.2199954 | 219.7297                            | 151.3623703 |
| 181.5352                             | 17.33677879 | 271.7982                            | 663.1206176 |
| 245.209                              | 60.0047122  | 301.5141                            | 412.2303611 |
| 331.8542                             | 18.55163521 | 402.3986                            | 167.3361732 |
| 360.7006                             | 24.10556463 | 455.2103                            | 539.4521283 |
| 435.0606                             | 24.34202115 | 472.2488                            | 662.0177874 |
| 468.136                              | 112.239085  | 484.1875                            | 161.117481  |
| 491.7529                             | 810.6732206 | 494.7703                            | 2011.967907 |
| 545.219                              | 292.2519561 | 535.0377                            | 139.89719   |
| 576.8714                             | 94.15970211 | 541.815                             | 101.7327077 |
| 599.8885                             | 20.08303409 | 589.943                             | 40.35496293 |
| 808.5265                             | 4.580378754 | 671.1627                            | 27.75495748 |
| 870.837                              | 19.22232458 | 859.0695                            | 18.5266744  |
| 909.6563                             | 206.5705445 | 880.516                             | 86.08967673 |
| 978.9                                | 32.55705279 | 987.963                             | 72.07390881 |
| 986.913                              | 101.3691353 | 995.3559                            | 92.02513495 |
| 1024.6225                            | 15.70221302 | 1058.416                            | 41.67658647 |
| 1071.1072                            | 34.63537941 | 1073.4117                           | 5.395327999 |
| 1133.645                             | 125.9914721 | 1105.0804                           | 82.31567724 |
| 1147.9679                            | 158.0012353 | 1105.9865                           | 88.96392642 |
| 1219.4929                            | 20.9870677  | 1153.9774                           | 239.8611661 |
| 1239.9586                            | 104.3587204 | 1163.1357                           | 46.28224335 |
| 1249.983                             | 87.28824468 | 1208.1335                           | 65.65796086 |
| 1254.5707                            | 60.31520821 | 1238.2264                           | 93.90026757 |
| 1296.8815                            | 44.13162713 | 1306.1901                           | 0.745230702 |
| 1352.1912                            | 4.832919985 | 1359.4326                           | 39.05606799 |
| 1388.8234                            | 40.94722262 | 1385.9801                           | 217.3740444 |
| 1410.5916                            | 80.48217394 | 1400.2096                           | 188.4246541 |
| 1416.9655                            | 355.7677497 | 1408.2764                           | 238.937266  |
| 1429.9105                            | 276.0738143 | 1421.6191                           | 151.9222713 |
| 1431.7151                            | 4.391718181 | 1425.0475                           | 30.20838988 |
| 1478.194                             | 3.73383419  | 1430.2442                           | 438.1337022 |
| 1487.2666                            | 23.4347825  | 1470.1951                           | 15.00411337 |
| 1489.0474                            | 15.79579613 | 1478.0373                           | 43.44014834 |
| 1505.153                             | 39.0645552  | 1494.2257                           | 41.69411919 |
| 1769.5444                            | 42.03810797 | 1705.1719                           | 168.7396449 |
| 3023.284                             | 31.4281674  | 2947.323                            | 12.03442354 |
| 3062.694                             | 15.68551233 | 2990.4761                           | 1.388863007 |
| 3076.902                             | 24.64299567 | 3028.7027                           | 24.71890963 |
| 3107.0426                            | 18.10971555 | 3059.0207                           | 3.240792888 |
| 3117.9073                            | 5.448414708 | 3073.2095                           | 9.288963523 |
| 3162.2646                            | 5.777203601 | 3124.2052                           | 2.328740772 |
| 3175.4767                            | 15.29839283 | 3172.1431                           | 4.953194464 |
| 3192.2536                            | 0.975400158 | 3186.4639                           | 4.43890435  |
| 3839.8155                            | 126.1667028 | 3850.9013                           | 80.12201956 |

Table S47: Vibrational frequencies of SO<sub>2</sub> and SO<sub>3</sub> calculated by G16 at the M06-2X/aug-cc-pVTZ level of theory.

| SO <sub>2</sub> |             | SO <sub>3</sub> |             |
|-----------------|-------------|-----------------|-------------|
| Freq.           | Intensity   | Freq.           | Intensity   |
| 535.5235        | 259.5333667 | 502.1363        | 322.9343028 |
| 1234.5494       | 118.5920085 | 527.6276        | 223.545788  |
| 1419.1182       | 714.5343309 | 527.8038        | 224.146889  |
| -               | -           | 1108.5291       | 0.007197641 |
| -               | -           | 1429.2422       | 605.8856566 |
| -               | -           | 1430.1431       | 605.5608929 |

Table S48: Vibrational frequencies of SO<sub>2</sub> and SO<sub>3</sub> calculated by G16 at the M06-2X/aug-cc-pV(T+d)Z level of theory.

| SO <sub>2</sub> |             | SO <sub>3</sub> |             |
|-----------------|-------------|-----------------|-------------|
| Freq.           | Intensity   | Freq.           | Intensity   |
| 540.39          | 260.197831  | 519.6272        | 314.109445  |
| 1254.613        | 125.3591387 | 541.8686        | 222.6491038 |
| 1454.322        | 714.8541964 | 541.8969        | 222.4814036 |
| -               | -           | 1134.3342       | 0           |
| -               | -           | 1459.7754       | 615.4021105 |
| -               | -           | 1459.7966       | 615.2229171 |

Table S49: Rotational constants of the optimised molecules at the M06-2X/aug-cc-pVTZ level of theory (GHz).

| Species                          | Coordinate | 1,2-isomer | 4,3-isomer | <i>E</i> -1,4-isomer | <i>Z</i> -1,4-isomer | <i>E</i> -4,1-isomer | <i>Z</i> -4,1-isomer | SO <sub>2</sub> | SO <sub>3</sub> |
|----------------------------------|------------|------------|------------|----------------------|----------------------|----------------------|----------------------|-----------------|-----------------|
| ISOPOO                           | X          | 2.8148848  | 2.9576288  | 3.3873656            | 2.8931585            | 4.7760783            | 2.4120726            | -               | -               |
|                                  | Y          | 1.6810235  | 1.4225951  | 1.1545784            | 1.5166968            | 0.8955393            | 1.7363124            | -               | -               |
|                                  | Z          | 1.4652277  | 1.2370739  | 1.0144532            | 1.1604781            | 0.8398830            | 1.1804250            | -               | -               |
| ISOPOO-SO <sub>2</sub> (complex) | X          | -          | -          | 0.9197172            | -                    | -                    | -                    | -               | -               |
|                                  | Y          | -          | -          | 0.8892175            | -                    | -                    | -                    | -               | -               |
|                                  | Z          | -          | -          | 0.6279472            | -                    | -                    | -                    | -               | -               |
| ISOPOO-SO <sub>2</sub> (TS)      | X          | 1.4941990  | 1.6547757  | 1.1767346            | 1.6324150            | 3.0069918            | 1.4160253            | -               | -               |
|                                  | Y          | 0.6452438  | 0.5834069  | 0.8824476            | 0.6084895            | 0.3280560            | 0.6534188            | -               | -               |
|                                  | Z          | 0.5258287  | 0.5092739  | 0.7182876            | 0.4814527            | 0.3117069            | 0.4949039            | -               | -               |
| ISOPOOSO <sub>2</sub>            | X          | 1.4982629  | 1.6563408  | 1.2081587            | 1.6190497            | 3.0414101            | 1.3634829            | -               | -               |
|                                  | Y          | 0.6865762  | 0.6030143  | 0.8582783            | 0.6548547            | 0.3363734            | 0.7182649            | -               | -               |
|                                  | Z          | 0.5448706  | 0.5114211  | 0.7219976            | 0.5054440            | 0.3213419            | 0.5177009            | -               | -               |
| ISOPO-SO <sub>3</sub> (TS)       | X          | 1.6447592  | 1.4979183  | 1.2180790            | 1.2979951            | 1.6461870            | 1.4618900            | -               | -               |
|                                  | Y          | 0.5794076  | 0.5985448  | 0.8204675            | 0.7742485            | 0.4719647            | 0.7300960            | -               | -               |
|                                  | Z          | 0.5306003  | 0.5267972  | 0.7057158            | 0.6574845            | 0.3877219            | 0.5665557            | -               | -               |
| ISOPO-SO <sub>3</sub> (complex)  | X          | -          | -          | 1.0487077            | -                    | -                    | -                    | -               | -               |
|                                  | Y          | -          | -          | 0.9200571            | -                    | -                    | -                    | -               | -               |
|                                  | Z          | -          | -          | 0.7248919            | -                    | -                    | -                    | -               | -               |
| ISOPO                            | X          | 3.7597207  | 4.4763937  | 3.9443592            | 4.2438549            | 5.4681125            | 4.3974923            | -               | -               |
|                                  | Y          | 2.0990515  | 1.7356070  | 1.5380095            | 1.4629537            | 1.4942408            | 1.4330600            | -               | -               |
|                                  | Z          | 1.7867971  | 1.4978162  | 1.1593200            | 1.2022347            | 1.3400175            | 1.1956059            | -               | -               |
| SO <sub>2</sub>                  | X          | -          | -          | -                    | -                    | -                    | -                    | 57.6553304      | -               |
|                                  | Y          | -          | -          | -                    | -                    | -                    | -                    | 10.4334157      | -               |
|                                  | Z          | -          | -          | -                    | -                    | -                    | -                    | 8.8346763       | -               |
| SO <sub>3</sub>                  | X          | -          | -          | -                    | -                    | -                    | -                    | -               | 10.3556149      |
|                                  | Y          | -          | -          | -                    | -                    | -                    | -                    | -               | 10.3494440      |
|                                  | Z          | -          | -          | -                    | -                    | -                    | -                    | -               | 5.1762643       |



Table S50: Rotational constants of the optimised molecules at the M06-2X/aug-cc-pV(T+d)Z level of theory (GHz).

| Species                          | Coordinate | 1,2-isomer | 4,3-isomer | <i>E</i> -1,4-isomer | <i>Z</i> -1,4-isomer | <i>E</i> -4,1-isomer | <i>Z</i> -4,1-isomer | SO <sub>2</sub> | SO <sub>3</sub> |
|----------------------------------|------------|------------|------------|----------------------|----------------------|----------------------|----------------------|-----------------|-----------------|
| ISOPOO                           | X          | 2.8148848  | 2.9576288  | 3.3873656            | 2.8931585            | 4.7760783            | 2.4120726            | -               | -               |
|                                  | Y          | 1.6810235  | 1.4225951  | 1.1545784            | 1.5166968            | 0.8955393            | 1.7363124            | -               | -               |
|                                  | Z          | 1.4652277  | 1.2370739  | 1.0144532            | 1.1604781            | 0.8398830            | 1.1804250            | -               | -               |
| ISOPOO-SO <sub>2</sub> (complex) | X          | -          | -          | 0.9197172            | -                    | -                    | -                    | -               | -               |
|                                  | Y          | -          | -          | 0.8892175            | -                    | -                    | -                    | -               | -               |
|                                  | Z          | -          | -          | 0.6279472            | -                    | -                    | -                    | -               | -               |
| ISOPOO-SO <sub>2</sub> (TS)      | X          | 1.4941990  | 1.6547757  | 1.1767346            | 1.6324150            | 3.0069918            | 1.4160253            | -               | -               |
|                                  | Y          | 0.6452438  | 0.5834069  | 0.8824476            | 0.6084895            | 0.3280560            | 0.6534188            | -               | -               |
|                                  | Z          | 0.5258287  | 0.5092739  | 0.7182876            | 0.4814527            | 0.3117069            | 0.4949039            | -               | -               |
| ISOPOOSO <sub>2</sub>            | X          | 1.4982629  | 1.6563408  | 1.2081587            | 1.6190497            | 3.0414101            | 1.3634829            | -               | -               |
|                                  | Y          | 0.6865762  | 0.6030143  | 0.8582783            | 0.6548547            | 0.3363734            | 0.7182649            | -               | -               |
|                                  | Z          | 0.5448706  | 0.5114211  | 0.7219976            | 0.5054440            | 0.3213419            | 0.5177009            | -               | -               |
| ISOPO-SO <sub>3</sub> (TS)       | X          | 1.6447592  | 1.4979183  | 1.2180790            | 1.2979951            | 1.6461870            | 1.4618900            | -               | -               |
|                                  | Y          | 0.5794076  | 0.5985448  | 0.8204675            | 0.7742485            | 0.4719647            | 0.7300960            | -               | -               |
|                                  | Z          | 0.5306003  | 0.5267972  | 0.7057158            | 0.6574845            | 0.3877219            | 0.5665557            | -               | -               |
| ISOPO-SO <sub>3</sub> (complex)  | X          | -          | -          | 1.0487077            | -                    | -                    | -                    | -               | -               |
|                                  | Y          | -          | -          | 0.9200571            | -                    | -                    | -                    | -               | -               |
|                                  | Z          | -          | -          | 0.7248919            | -                    | -                    | -                    | -               | -               |
| ISOPO                            | X          | 3.7597207  | 4.4763937  | 3.9443592            | 4.2438549            | 5.4681125            | 4.3974923            | -               | -               |
|                                  | Y          | 2.0990515  | 1.7356070  | 1.5380095            | 1.4629537            | 1.4942408            | 1.4330600            | -               | -               |
|                                  | Z          | 1.7867971  | 1.4978162  | 1.1593200            | 1.2022347            | 1.3400175            | 1.1956059            | -               | -               |
| SO <sub>2</sub>                  | X          | -          | -          | -                    | -                    | -                    | -                    | 57.6553304      | -               |
|                                  | Y          | -          | -          | -                    | -                    | -                    | -                    | 10.4334157      | -               |
|                                  | Z          | -          | -          | -                    | -                    | -                    | -                    | 8.8346763       | -               |
| SO <sub>3</sub>                  | X          | -          | -          | -                    | -                    | -                    | -                    | -               | 10.3535751      |
|                                  | Y          | -          | -          | -                    | -                    | -                    | -                    | -               | 10.3535751      |
|                                  | Z          | -          | -          | -                    | -                    | -                    | -                    | -               | 5.1767876       |

Table S51: Electronic state (point group) of the optimised molecules at the M06-2X/aug-cc-pVTZ and M06-2X/aug-cc-pV(T+d)Z levels of theory.

| Species                          | 1,2-isomer          | 4,3-isomer          | <i>E</i> -1,4-isomer | <i>Z</i> -1,4-isomer | <i>E</i> -4,1-isomer | <i>Z</i> -4,1-isomer | SO <sub>2</sub>      | SO <sub>3</sub>     |
|----------------------------------|---------------------|---------------------|----------------------|----------------------|----------------------|----------------------|----------------------|---------------------|
| ISOPOO                           | <sup>2</sup> A (C1) | <sup>2</sup> A (C1) | <sup>2</sup> A (C1)  | <sup>2</sup> A (C1)  | <sup>2</sup> A (C1)  | <sup>2</sup> A (C1)  | -                    | -                   |
| ISOPOO-SO <sub>2</sub> (complex) | -                   | -                   | <sup>2</sup> A (C1)  | -                    | -                    | -                    | -                    | -                   |
| ISOPOO-SO <sub>2</sub> (TS)      | <sup>2</sup> A (C1) | <sup>2</sup> A (C1) | <sup>2</sup> A (C1)  | <sup>2</sup> A (C1)  | <sup>2</sup> A (C1)  | <sup>2</sup> A (C1)  | -                    | -                   |
| ISOPOOSO <sub>2</sub>            | <sup>2</sup> A (C1) | <sup>2</sup> A (C1) | <sup>2</sup> A (C1)  | <sup>2</sup> A (C1)  | <sup>2</sup> A (C1)  | <sup>2</sup> A (C1)  | -                    | -                   |
| ISOPO-SO <sub>3</sub> (TS)       | <sup>2</sup> A (C1) | <sup>2</sup> A (C1) | <sup>2</sup> A (C1)  | <sup>2</sup> A (C1)  | <sup>2</sup> A (C1)  | <sup>2</sup> A (C1)  | -                    | -                   |
| ISOPO-SO <sub>3</sub> (complex)  | -                   | -                   | <sup>2</sup> A (C1)  | -                    | -                    | -                    | -                    | -                   |
| ISOPO                            | <sup>2</sup> A (C1) | <sup>2</sup> A (C1) | <sup>2</sup> A (C1)  | <sup>2</sup> A (C1)  | <sup>2</sup> A (C1)  | <sup>2</sup> A (C1)  | -                    | -                   |
| SO <sub>2</sub>                  | -                   | -                   | -                    | -                    | -                    | -                    | <sup>1</sup> A (C2v) | -                   |
| SO <sub>3</sub>                  | -                   | -                   | -                    | -                    | -                    | -                    | -                    | <sup>1</sup> A (Cs) |

Table S52: Spin contamination of the open-shell molecules at the M06-2X/aug-cc-pVTZ level of theory. “Before” and “After” indicate the values before and after the annihilation of spin contamination.

| Species                          |        | 1,2-isomer | 4,3-isomer | <i>E</i> -1,4-isomer | <i>Z</i> -1,4-isomer | <i>E</i> -4,1-isomer | <i>Z</i> -4,1-isomer |
|----------------------------------|--------|------------|------------|----------------------|----------------------|----------------------|----------------------|
| ISOPOO                           | Before | 0.7557     | 0.7558     | 0.7557               | 0.7558               | 0.7557               | 0.7558               |
|                                  | After  | 0.7500     | 0.7500     | 0.7500               | 0.7500               | 0.7500               | 0.7500               |
| ISOPOO-SO <sub>2</sub> (complex) | Before | -          | -          | 0.7562               | -                    | -                    | -                    |
|                                  | After  | -          | -          | 0.7500               | -                    | -                    | -                    |
| ISOPOO-SO <sub>2</sub> (TS)      | Before | 0.7641     | 0.7685     | 0.7754               | 0.7644               | 0.7763               | 0.7690               |
|                                  | After  | 0.7501     | 0.7502     | 0.7503               | 0.7501               | 0.7502               | 0.7502               |
| ISOPOOSO <sub>2</sub>            | Before | 0.7579     | 0.7582     | 0.7578               | 0.7580               | 0.7581               | 0.7579               |
|                                  | After  | 0.7500     | 0.7501     | 0.7500               | 0.7500               | 0.7500               | 0.7500               |
| ISOPO-SO <sub>3</sub> (TS)       | Before | 1.0050     | 0.9294     | 0.7602               | 0.8004               | 0.7701               | 0.7592               |
|                                  | After  | 0.7573     | 0.7571     | 0.7501               | 0.7504               | 0.7502               | 0.7500               |
| ISOPO-SO <sub>3</sub> (complex)  | Before | -          | -          | 0.7543               | -                    | -                    | -                    |
|                                  | After  | -          | -          | 0.7500               | -                    | -                    | -                    |
| ISOPO                            | Before | 0.7552     | 0.7559     | 0.7546               | 0.7544               | 0.7567               | 0.7544               |
|                                  | After  | 0.7500     | 0.7500     | 0.7500               | 0.7500               | 0.7500               | 0.7500               |

Table S53: Spin contamination of the open-shell molecules at the CCSD(T)/aug-cc-pVTZ//M06-2X/aug-cc-pVTZ level of theory. “Before” and “After” indicate the values before and after the annihilation of spin contamination.

| Species                          |        | 1,2-isomer | 4,3-isomer | <i>E</i> -1,4-isomer | <i>Z</i> -1,4-isomer | <i>E</i> -4,1-isomer | <i>Z</i> -4,1-isomer |
|----------------------------------|--------|------------|------------|----------------------|----------------------|----------------------|----------------------|
| ISOPOO                           | Before | 0.7649     | 0.7663     | 0.7666               | 0.7687               | 0.7648               | 0.7701               |
|                                  | After  | 0.7502     | 0.7502     | 0.7502               | 0.7503               | 0.7502               | 0.7503               |
| ISOPOO-SO <sub>2</sub> (complex) | Before | -          | -          | 0.7688               | -                    | -                    | -                    |
|                                  | After  | -          | -          | 0.7503               | -                    | -                    | -                    |
| ISOPOO-SO <sub>2</sub> (TS)      | Before | 0.8903     | 0.8891     | 0.8992               | 0.8899               | 0.8916               | 0.8921               |
|                                  | After  | 0.7562     | 0.7565     | 0.7576               | 0.7562               | 0.7563               | 0.7563               |
| ISOPOOSO <sub>2</sub>            | Before | 0.7866     | 0.7871     | 0.7848               | 0.7872               | 0.7872               | 0.7873               |
|                                  | After  | 0.751      | 0.751      | 0.7509               | 0.751                | 0.7511               | 0.751                |
| ISOPO-SO <sub>3</sub> (TS)       | Before | 1.2981     | 1.296      | 1.1724               | 1.176                | 1.8284               | 1.2255               |
|                                  | After  | 0.8771     | 0.8618     | 0.7833               | 0.7844               | 1.3822               | 0.7995               |
| ISOPO-SO <sub>3</sub> (complex)  | Before | -          | -          | 0.7604               | -                    | -                    | -                    |
|                                  | After  | -          | -          | 0.7501               | -                    | -                    | -                    |
| ISOPO                            | Before | 0.7696     | 0.7648     | 0.7656               | 0.7671               | 0.7704               | 0.7652               |
|                                  | After  | 0.7503     | 0.7502     | 0.7502               | 0.7502               | 0.7503               | 0.7502               |

Table S54: Spin contamination of the open-shell molecules at the M06-2X/aug-cc-pV(T+d)Z level of theory. “Before” and “After” indicate the values before and after the annihilation of spin contamination.

| Species                          |        | 1,2-isomer | 4,3-isomer | <i>E</i> -1,4-isomer | <i>Z</i> -1,4-isomer | <i>E</i> -4,1-isomer | <i>Z</i> -4,1-isomer |
|----------------------------------|--------|------------|------------|----------------------|----------------------|----------------------|----------------------|
| ISOPOO                           | Before | 0.7556     | 0.7557     | 0.7557               | 0.7557               | 0.7557               | 0.7557               |
|                                  | After  | 0.7500     | 0.7500     | 0.7500               | 0.7500               | 0.7500               | 0.7500               |
| ISOPOO-SO <sub>2</sub> (complex) | Before | -          | -          | 0.7562               | -                    | -                    | -                    |
|                                  | After  | -          | -          | 0.75                 | -                    | -                    | -                    |
| ISOPOO-SO <sub>2</sub> (TS)      | Before | 0.7750     | 0.7741     | 0.7754               | 0.7755               | 0.7761               | 0.7762               |
|                                  | After  | 0.7502     | 0.7502     | 0.7502               | 0.7502               | 0.7502               | 0.7502               |
| ISOPOOSO <sub>2</sub>            | Before | 0.7575     | 0.7577     | 0.7575               | 0.7576               | 0.7578               | 0.7576               |
|                                  | After  | 0.7500     | 0.7500     | 0.7500               | 0.7500               | 0.7500               | 0.7500               |
| ISOPO-SO <sub>3</sub> (TS)       | Before | 0.8061     | 0.8072     | 0.7996               | 0.8004               | 0.8399               | 0.8053               |
|                                  | After  | 0.7506     | 0.7506     | 0.7504               | 0.7504               | 0.7516               | 0.7505               |
| ISOPO-SO <sub>3</sub> (complex)  | Before | -          | -          | 0.7544               | -                    | -                    | -                    |
|                                  | After  | -          | -          | 0.75                 | -                    | -                    | -                    |
| ISOPO                            | Before | 0.7545     | 0.7557     | 0.7545               | 0.7545               | 0.7568               | 0.7545               |
|                                  | After  | 0.7500     | 0.7500     | 0.7500               | 0.7500               | 0.7500               | 0.7500               |

Table S55: Spin contamination of the open-shell molecules at the CCSD(T)/aug-cc-pV(T+d)Z//M06-2X/aug-cc-pV(T+d)Z level of theory. “Before” and “After” indicate the values before and after the annihilation of spin contamination.

| Species                          |        | 1,2-isomer | 4,3-isomer | <i>E</i> -1,4-isomer | <i>Z</i> -1,4-isomer | <i>E</i> -4,1-isomer | <i>Z</i> -4,1-isomer |
|----------------------------------|--------|------------|------------|----------------------|----------------------|----------------------|----------------------|
| ISOPOO                           | Before | 0.7649     | 0.7663     | 0.7666               | 0.7687               | 0.7648               | 0.7701               |
|                                  | After  | 0.7502     | 0.7502     | 0.7502               | 0.7503               | 0.7502               | 0.7503               |
| ISOPOO-SO <sub>2</sub> (complex) | Before | -          | -          | 0.7679               | -                    | -                    | -                    |
|                                  | After  | -          | -          | 0.7502               | -                    | -                    | -                    |
| ISOPOO-SO <sub>2</sub> (TS)      | Before | 0.8856     | 0.8846     | 0.8958               | 0.8853               | 0.8866               | 0.8868               |
|                                  | After  | 0.7555     | 0.7558     | 0.7569               | 0.7556               | 0.7556               | 0.7557               |
| ISOPOOSO <sub>2</sub>            | Before | 0.7817     | 0.7821     | 0.7801               | 0.7823               | 0.7821               | 0.7823               |
|                                  | After  | 0.7508     | 0.7508     | 0.7507               | 0.7508               | 0.7508               | 0.7508               |
| ISOPO-SO <sub>3</sub> (TS)       | Before | 1.2716     | 1.2683     | 1.1511               | 1.1546               | 1.9148               | 1.2023               |
|                                  | After  | 0.8631     | 0.8487     | 0.7789               | 0.7789               | 1.38558              | 0.7938               |
| ISOPO-SO <sub>3</sub> (complex)  | Before | -          | -          | 0.7604               | -                    | -                    | -                    |
|                                  | After  | -          | -          | 0.7501               | -                    | -                    | -                    |
| ISOPO                            | Before | 0.7696     | 0.7648     | 0.7656               | 0.7671               | 0.7704               | 0.7652               |
|                                  | After  | 0.7503     | 0.7502     | 0.7502               | 0.7502               | 0.7503               | 0.7502               |

Table S56: Results of  $T_1$ -diagnostic at the CCSD(T)/aug-cc-pVTZ//M06-2X/aug-cc-pVTZ level of theory.

| Species                          | 1,2-isomer | 4,3-isomer | <i>E</i> -1,4-isomer | <i>Z</i> -1,4-isomer | <i>E</i> -4,1-isomer | <i>Z</i> -4,1-isomer | SO <sub>2</sub> | SO <sub>3</sub> |
|----------------------------------|------------|------------|----------------------|----------------------|----------------------|----------------------|-----------------|-----------------|
| ISOPOO                           | 0.02068415 | 0.02076303 | 0.02061027           | 0.02107679           | 0.02026341           | 0.02103601           | -               | -               |
| ISOPOO-SO <sub>2</sub> (complex) | -          | -          | 0.02141138           | -                    | -                    | -                    | -               | -               |
| ISOPOO-SO <sub>2</sub> (TS1)     | 0.02401188 | 0.02392258 | 0.02446145           | 0.0247022            | 0.02392523           | 0.02413011           | -               | -               |
| ISOPOOSO <sub>2</sub>            | 0.01791046 | 0.01795712 | 0.01783919           | 0.01787137           | 0.01777258           | 0.01782545           | -               | -               |
| ISOPO-SO <sub>3</sub> (TS2)      | 0.03395381 | 0.03411182 | 0.03101153           | 0.03106571           | 0.04792527           | 0.03276026           | -               | -               |
| ISOPO-SO <sub>3</sub> (complex)  | -          | -          | 0.01714205           | -                    | -                    | -                    | -               | -               |
| ISOPO                            | 0.01677333 | 0.01858451 | 0.01583723           | 0.01599266           | 0.01372785           | 0.01530928           | -               | -               |
| SO <sub>2</sub>                  | -          | -          | -                    | -                    | -                    | -                    | 0.02109463      | -               |
| SO <sub>3</sub>                  | -          | -          | -                    | -                    | -                    | -                    | -               | 0.01833553      |

Table S57: Results of  $T_1$ -diagnostic at the CCSD(T)/aug-cc-pV(T+d)Z//M06-2X/aug-cc-pV(T+d)Z level of theory.

| Species                          | 1,2-isomer | 4,3-isomer | <i>E</i> -1,4-isomer | <i>Z</i> -1,4-isomer | <i>E</i> -4,1-isomer | <i>Z</i> -4,1-isomer | SO <sub>2</sub> | SO <sub>3</sub> |
|----------------------------------|------------|------------|----------------------|----------------------|----------------------|----------------------|-----------------|-----------------|
| ISOPOO                           | 0.02068415 | 0.02075969 |                      | 0.02107679           | 0.02026341           | 0.02103601           | -               | -               |
| ISOPOO-SO <sub>2</sub> (complex) | -          | -          | 0.02119027           | -                    | -                    | -                    | -               | -               |
| ISOPOO-SO <sub>2</sub> (TS1)     | 0.02386706 | 0.02379334 | 0.02436636           | 0.02392955           | 0.02377627           | 0.0239619            | -               | -               |
| ISOPOOSO <sub>2</sub>            | 0.01748244 | 0.01751658 | 0.01742283           | 0.01746881           | 0.01734652           | 0.01742249           | -               | -               |
| ISOPO-SO <sub>3</sub> (TS2)      | 0.03332761 | 0.03341617 | 0.03060486           | 0.03062592           | 0.13040866           | 0.03212904           | -               | -               |
| ISOPO-SO <sub>3</sub> (complex)  | -          | -          | 0.01688054           | -                    | -                    | -                    | -               | -               |
| ISOPO                            | 0.01677337 | 0.01858449 | 0.0158383            | 0.01599316           | 0.01372785           | 0.01530928           | -               | -               |
| SO <sub>2</sub>                  | -          | -          | -                    | -                    | -                    | -                    | 0.0204715       | -               |
| SO <sub>3</sub>                  | -          | -          | -                    | -                    | -                    | -                    | -               | 0.01782716      |

Table S58: Kinetic parameters of ISOPOOs + SO<sub>2</sub> reactions used in Fig. 3 of the main manuscript.

| ISOPOOs              | <i>A</i>                | <i>E</i> a/R | <i>k</i> <sub>TS1</sub> (298K) |
|----------------------|-------------------------|--------------|--------------------------------|
| 1,2-ISOPOO           | $7.317 \times 10^{-15}$ | 4603         | $1.440 \times 10^{-21}$        |
| 4,3-ISOPOO           | $2.915 \times 10^{-15}$ | 4734         | $3.701 \times 10^{-22}$        |
| <i>Z</i> -1,4-ISOPOO | $1.281 \times 10^{-14}$ | 4681         | $1.939 \times 10^{-21}$        |
| <i>Z</i> -4,1-ISOPOO | $5.776 \times 10^{-15}$ | 4671         | $9.057 \times 10^{-22}$        |
| <i>E</i> -1,4-ISOPOO | $3.399 \times 10^{-16}$ | 7020         | $2.015 \times 10^{-26}$        |
| <i>E</i> -4,1-ISOPOO | $7.383 \times 10^{-15}$ | 4216         | $5.323 \times 10^{-21}$        |

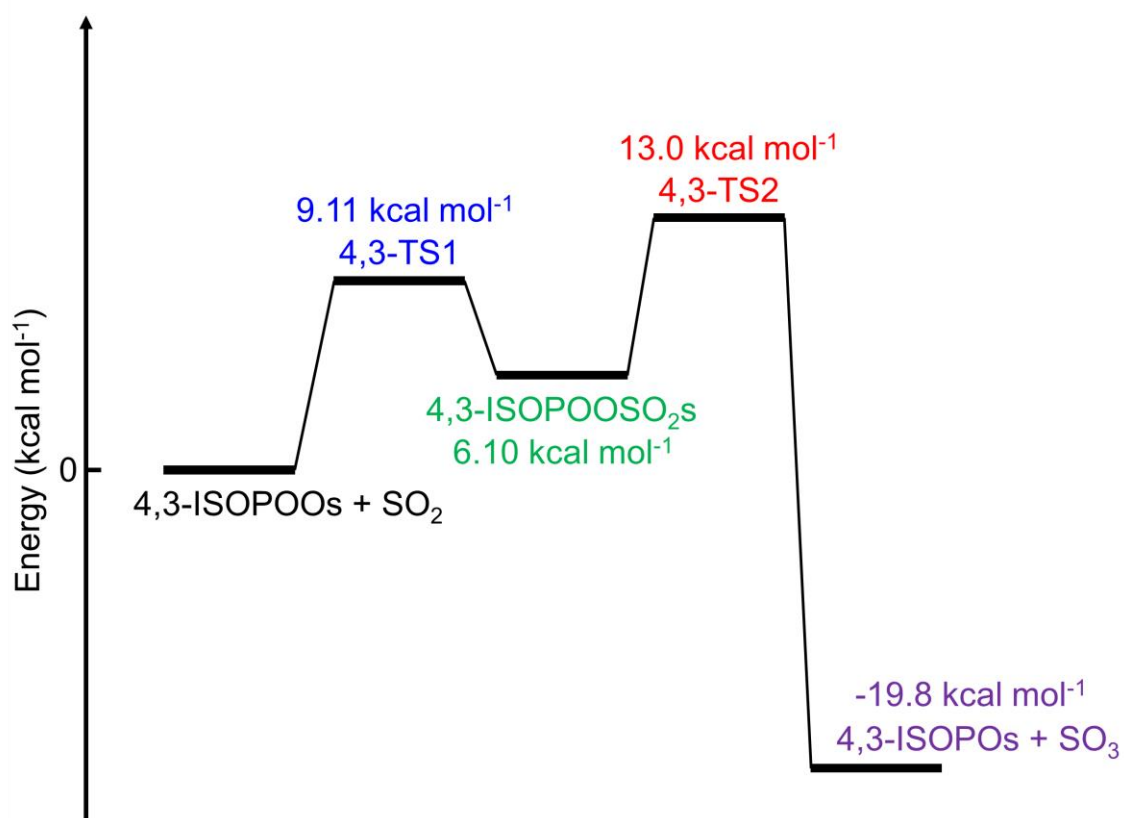

Figure S10: Potential diagram of the entire 4,3-ISOPOO + SO<sub>2</sub> reaction obtained from the quantum chemical calculations for evaluated by CCSD(T)/aug-cc-pV(T+d)Z//M06-2X/aug-cc-pV(T+d)Z level of theory.

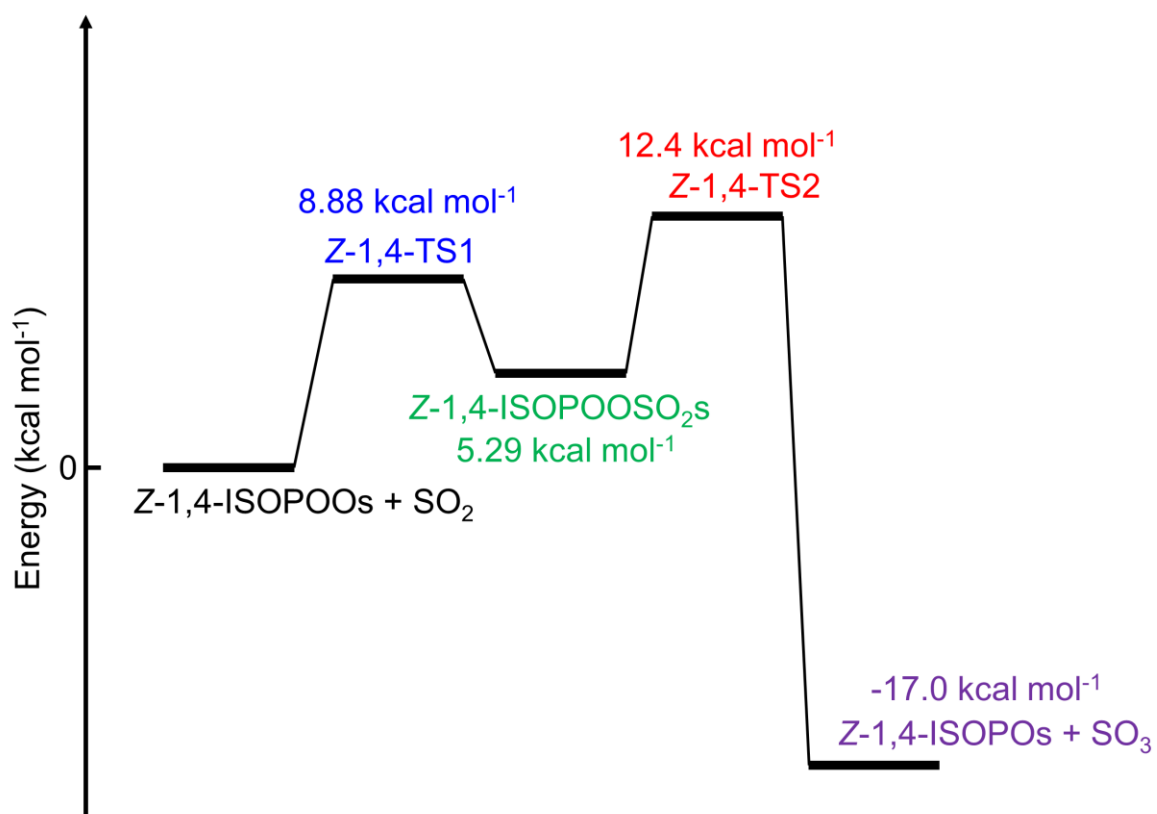

Figure S11: Potential diagram of the entire Z-1,4-ISOPOO + SO<sub>2</sub> reaction obtained from the quantum chemical calculations for evaluated by CCSD(T)/aug-cc-pV(T+d)Z//M06-2X/aug-cc-pV(T+d)Z level of theory.

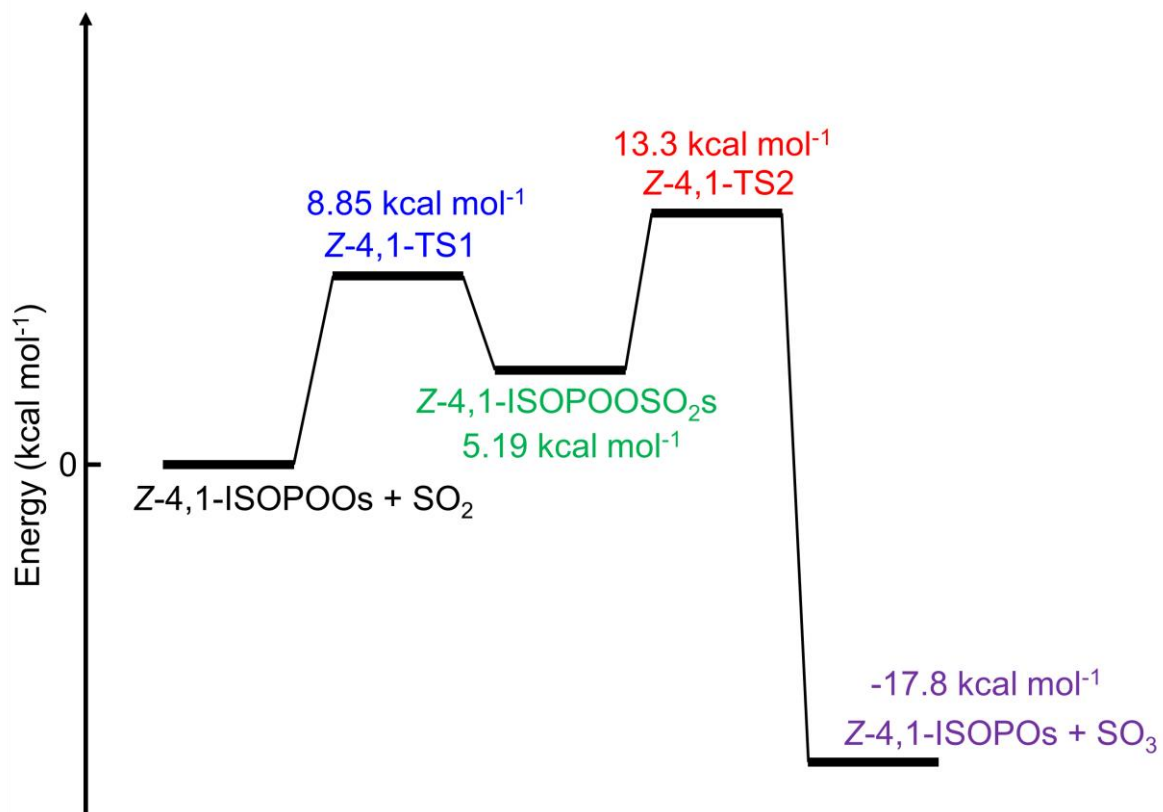

Figure S12: Potential diagram of the entire Z-4,1-ISOPOO + SO<sub>2</sub> reaction obtained from the quantum chemical calculations for evaluated by CCSD(T)/aug-cc-pV(T+d)Z//M06-2X/aug-cc-pV(T+d)Z level of theory.



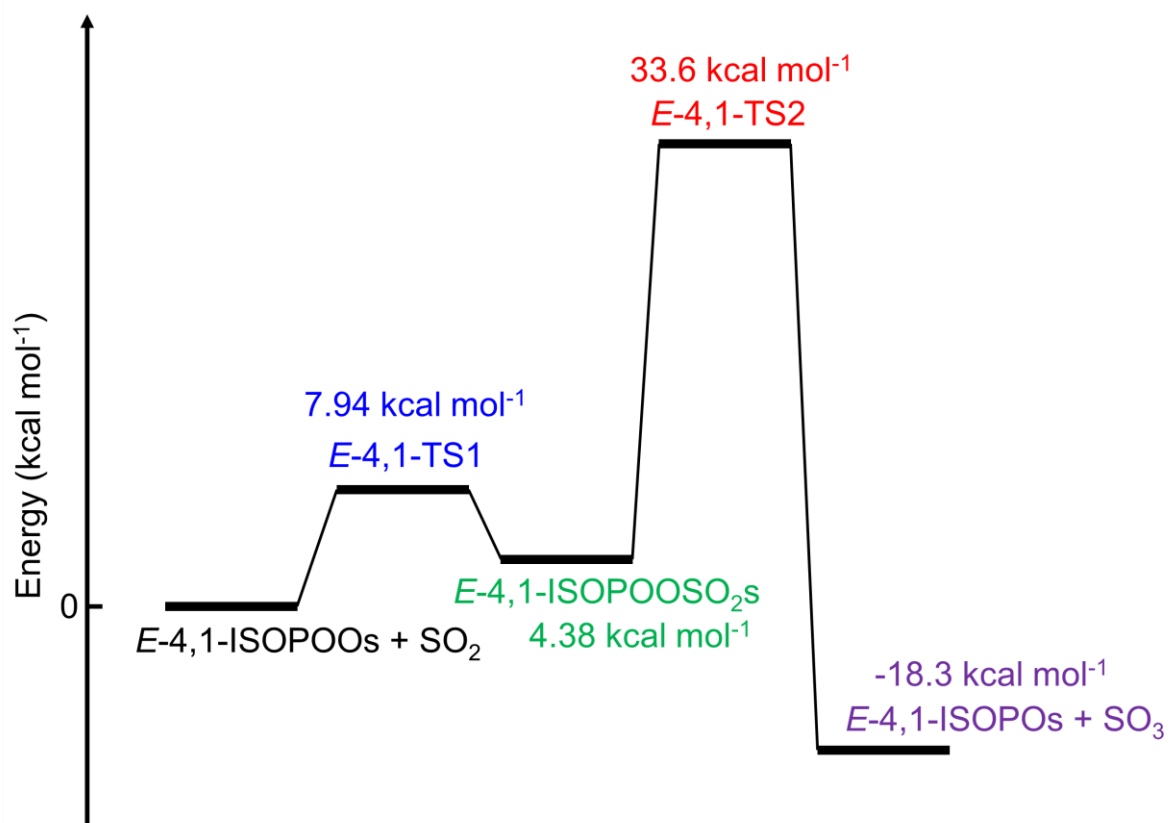

Figure S13: Potential diagram of the entire *E-4,1-ISOPOO* +  $\text{SO}_2$  reaction obtained from the quantum chemical calculations for evaluated by CCSD(T)/aug-cc-pV(T+d)Z//M06-2X/aug-cc-pV(T+d)Z level of theory.

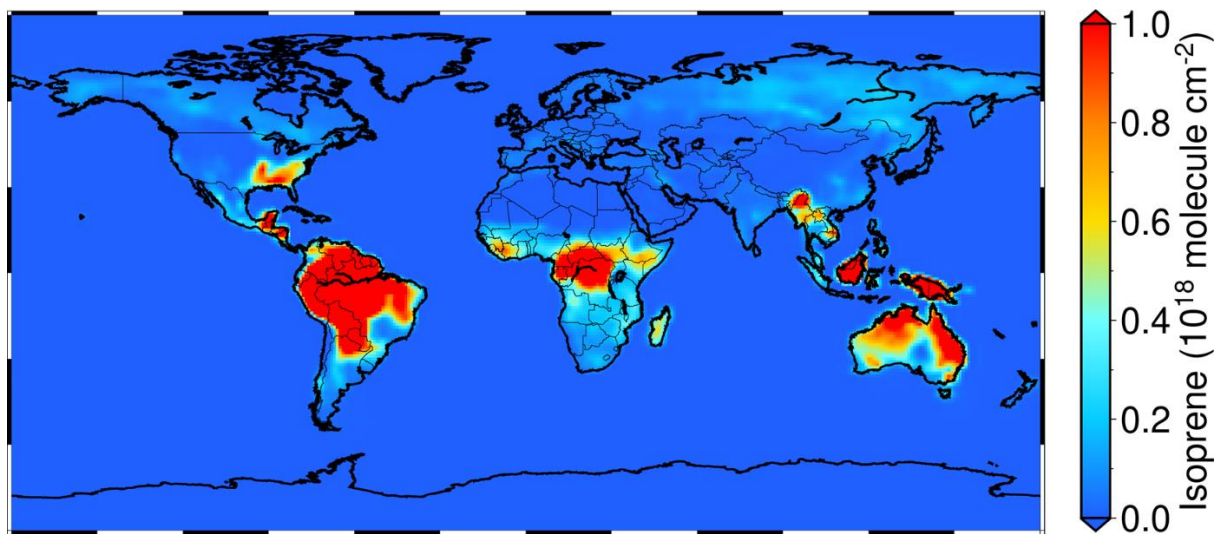

Figure S14: Calculated annual-mean column concentration of isoprene.

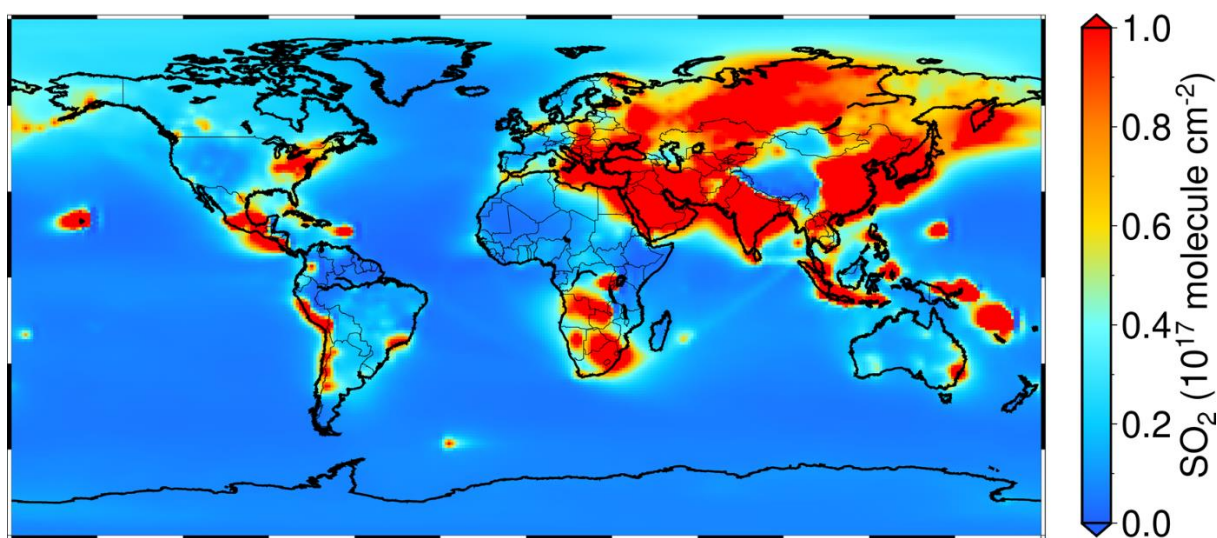

Figure S15: Calculated annual-mean column concentrations of  $\text{SO}_2$ .

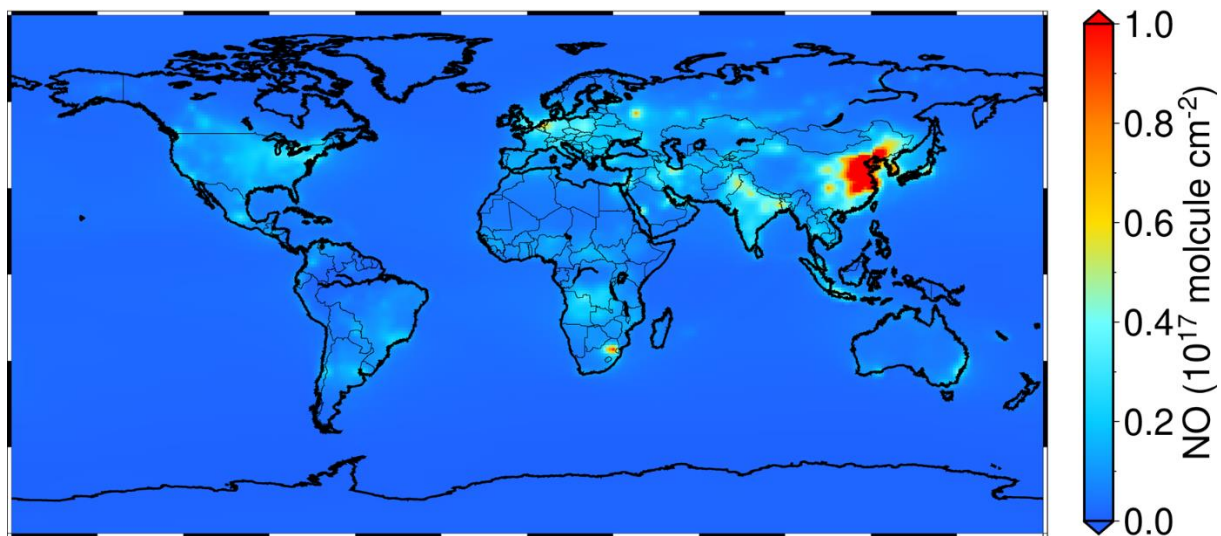

Figure S16: Calculated annual-mean column concentration of NO.

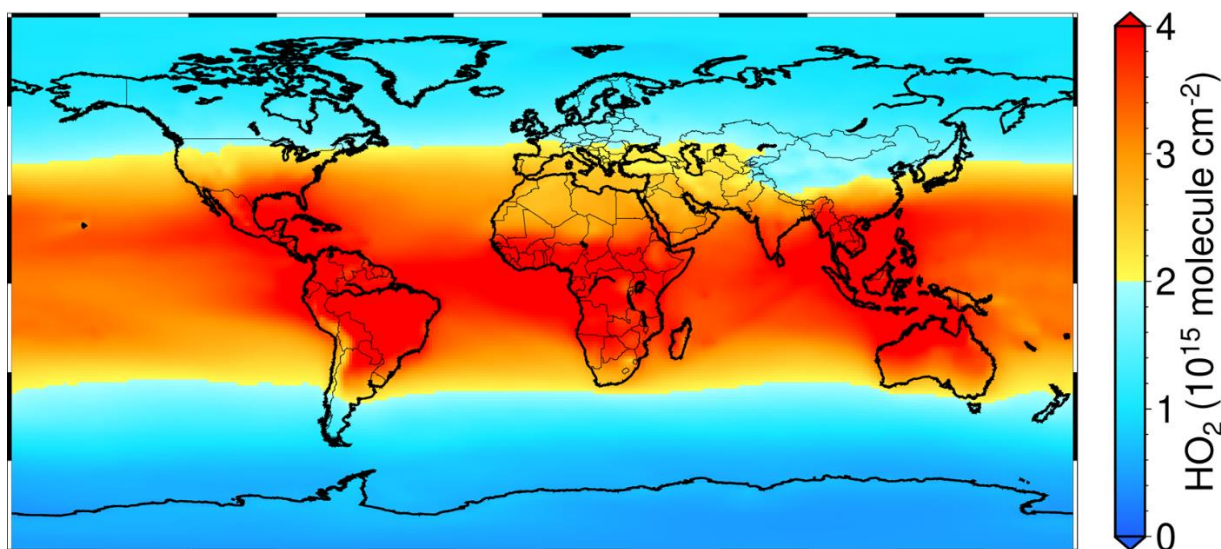

Figure S17: Calculated results of annual-mean column concentration of HO<sub>2</sub>.
